# Supplementary material for: Enantioselective synthesis of pyrazolone α-aminonitrile derivatives via an organocatalytic Strecker reaction
Source: Royal Society of Chemistry journal article supplement (doi:10.1039/c7cc02874a), 2017-01-01
Supplement: c7cc02874a1.pdf [file c7cc02874a1.pdf]

## **Enantioselective synthesis of pyrazolone $\alpha$ -aminonitrile derivatives via an organocatalytic Strecker reaction**

Suruchi Mahajan,<sup>†a</sup> Pankaj Chauhan,<sup>†a</sup> Uğur Kaya,<sup>a</sup> Kristina Deckers,<sup>a</sup> Kari Rissanen<sup>b</sup> and Dieter Enders<sup>\*a</sup>

### **Contents**

|                               |       |
|-------------------------------|-------|
| General Methods and Materials | 1     |
| General Procedure             | 1-3   |
| Analytical Data               | 3-17  |
| NMR Spectra                   | 18-50 |
| HPLC Data                     | 51-66 |

## General Methods and Materials:

All reactions were performed in oven-dried glassware. Analytical TLC were carried out using SIL G-25 UV254 from Machery & Nagel and visualized with ultraviolet radiation at 254 nm.  $^1\text{H}$  and  $^{13}\text{C}$  NMR spectra were recorded in  $\text{CDCl}_3$  at ambient temperature on Varian Innova 400 or Innova 600 instruments. Chemical shifts for  $^1\text{H}$  NMR and  $^{13}\text{C}$  NMR spectra were reported in parts per million (ppm), with coupling constants given in Hertz (Hz). The following abbreviations are used for spin multiplicity: s = singlet, d = doublet, dd = doublet of doublet, t = triplet, q = quartet, m = multiplet and br = broad signal. Mass spectra were recorded with the spectrometer SSQ 7000 from Finnigan at 70 eV, whereas HRMS data (ESI) were collected with a ThermoFisher Scientific LTQ-Orbitrap XL apparatus. IR spectra were taken on a PerkinElmer Spectrum 100 FT-IR spectrometer. Analytical HPLC was carried out either on a Hewlett-Packard 1050 series instrument or Agilent 1100 instrument using chiral stationary phases. Analytical SFC was carried out on a Thar SFC Waters Method Station II instrument using chiral stationary phases. The diastomeric ratio was determined by the  $^1\text{H}$  NMR and HPLC analysis of the isolated product. Optical rotation values were measured on a Perkin-Elmer 241 polarimeter. Melting points were measured on a LLG MPM-H2 melting point instrument.

Unless specified, the starting materials and reagents were purchased directly from the commercial suppliers and used without further purification. The catalysts **C1** to **C5**<sup>1</sup> and **C-7** to **C-8**<sup>2</sup> were synthesized using known literature procedures.

## General Procedures:

**General procedure for the synthesis of pyrazolone derived aryl ketimines 2a,g-p (Scheme 1):** Nitrosoarene **5** (1.0 equiv.) and  $\text{K}_2\text{CO}_3$  (0.2 equiv.) were added to a solution of pyrazolone derivative **6** (1.0 equiv.) in MeOH (0.6 M) at room temperature. The reaction mixture was then refluxed for 3 hours. The solvent was removed under reduced pressure and the residue was dissolved in ethyl acetate. The organic layer was washed three times with water, once with brine and then dried over anhydrous  $\text{MgSO}_4$ . After evaporation of ethyl acetate under reduced pressure, the crude product was purified by flash column chromatography (*n*-pentane/diethyl ether, 3:1) to afford the ketimine products **2a,g-p**.

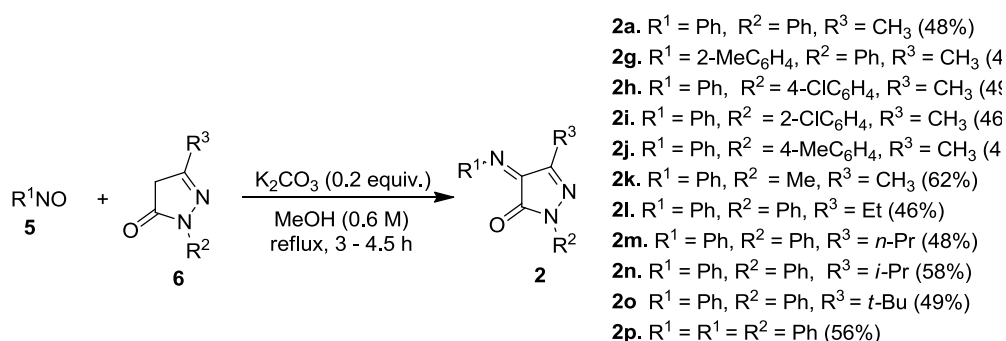

Scheme 1

1. (a) J. P. Malerich, K. Hagihara and V. H. Rawal, *J. Am. Chem. Soc.*, **2008**, *130*, 14416; (b) Y. Zhu, J. P. Malerich and V. H. Rawal, *Angew. Chem., Int. Ed.*, **2010**, *49*, 153.
2. H. L. Yi, W. L. Tang and L. Deng, *J. Am. Chem. Soc.*, **2004**, *126*, 9906.

**Procedure for the synthesis of pyrazolone-derived ketone 7 (Scheme 2):** The ketimine **2a** (20 mmol) was dissolved in THF (0.13 M) and a 2.0 N HCl solution (20 mL) was added to the reaction mixture at room temperature. The progress of the reaction was monitored on TLC. After completion of the reaction, the mixture was diluted with water. The organic layer was extracted three times with dichloromethane and the combined organic layers were dried over anhydrous MgSO<sub>4</sub>. The solvent was removed under reduced pressure and the crude product was directly purified by flash column chromatography (*n*-hexane/EtOAc, 1:1) to afford the desired product **7**.

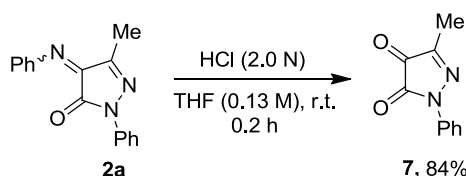

**Scheme 2**

**General procedure for the synthesis of pyrazolone derived aryl ketimines 2c-f (Scheme 3):** A mixture of pyrazolone-derived ketone **7** (1.0 equiv.) and aniline derivative (1.0 equiv.) in EtOH (2.0 M) was refluxed for 5 hours. In the case of **2e**, *p*-TSA (30 mol%) was added as catalyst. After completion of the reaction, the solvent was removed under reduced pressure and the crude product was directly purified by flash column chromatography (*n*-pentane/diethyl ether, 3:1) to afford the desired product **2c-f**.

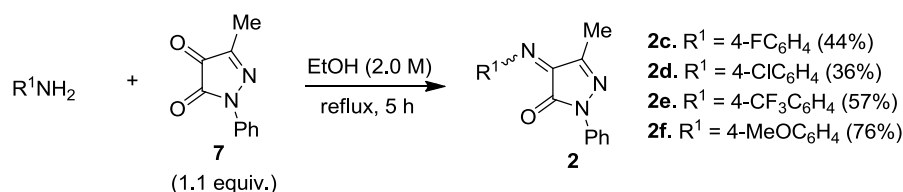

**Scheme 3**

**General procedure for the synthesis of pyrazolone derived *N*-Boc ketimine 2b (Scheme 4):** The *tert*-butyl(triphenylphosphoranylidene)acetate (1.1 equiv.) was added to a solution of the pyrazolone-derived ketone **7** in 1,4-dioxane (0.2 M) at room temperature and the mixture was refluxed for 3-3.5 hours. After completion of the reaction, the solvent was removed under reduced pressure and the crude product was directly purified by flash column chromatography (*n*-pentane/diethyl ether, 1:1) to afford the desired product **2b**.

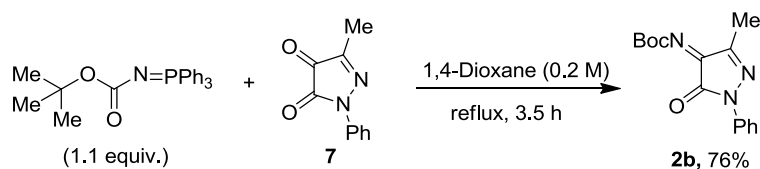

**Scheme 4**

**General procedure for the organocatalytic enantioselective Strecker synthesis of 3 and *ent*-3 (Scheme 5):** In a 10 mL reaction tube equipped with a magnetic stirring bar, the imine **2** (1 equiv., 0.2 mmol), catalyst **C-2** or **C-5** (5 mol%) were stirred in dichloroethane (4.5 mL) at room temperature. After 10 minutes, trimethylsilyl cyanide **1a** (1.5 equiv. 0.45 mmol) was added and the stirring was continued for 4 days at room temperature. The crude product was

directly purified by flash column chromatography (*n*-hexane/EtOAc, 4:1) to afford the products **3** or *ent*-**3**.

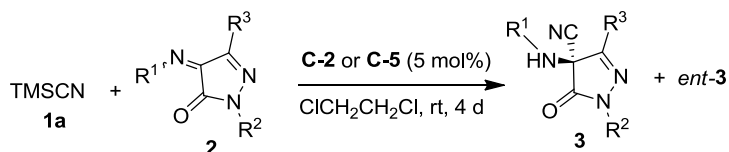

**Scheme 5**

**Procedure for the deprotection of the 4-methoxyphenyl group (Scheme 6):** The  $\alpha$ -amino nitrile *ent*-**3e** (64 mg, 0.2 mmol) was dissolved in CH<sub>3</sub>CN/H<sub>2</sub>O (1:1, 4 mL). Periodic acid (182 mg, 0.8 mmol, 4 equiv.) and sulfuric acid (0.4 mL) were added and the mixture was stirred until completion of the reaction in 1 h. Diethyl ether was added to the solution, the phases were separated and the aqueous phase was extracted twice with diethyl ether. The combined organic phases were dried over sodium sulfate and concentrated under vacuum. The crude product was directly purified by flash column chromatography (*n*-hexane/EtOAc, 6:4) to afford the product **4**.

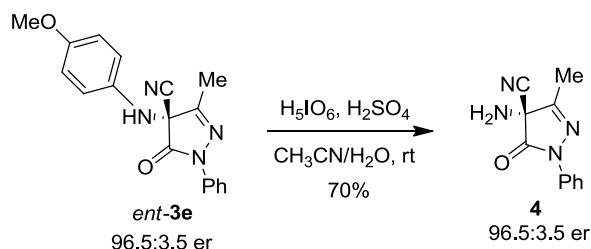

**Scheme 6**

### Analytical data:

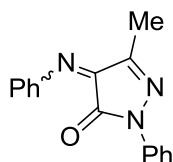

**5-Methyl-2-phenyl-4-(phenylimino)-2,4-dihydro-3H-pyrazol-3-one (2a).** Red solid; mp = 102–104 °C; IR (Capillary): 3060, 2287, 2084, 1937, 1664, 1587, 1488, 1412, 1360, 1297, 1132, 998, 911, 831, 744, 687 cm<sup>-1</sup>; <sup>1</sup>H NMR (600 MHz, CDCl<sub>3</sub>):  $\delta$  7.88–7.86 (m, 2H, ArH), 7.45–7.23 (m, 7H, ArH), 7.22–7.19 (m, 1H, ArH), 2.35 (s, 3H, CH<sub>3</sub>); <sup>13</sup>C NMR (151 MHz, CDCl<sub>3</sub>):  $\delta$  152.7, 151.2, 150.8, 146.3, 137.7, 129.0 (2C), 128.7 (2C), 125.6, 121.8 (2C), 118.5 (2C), 118.4, 12.4; MS (EI):  $m/z$  262.9 M<sup>+</sup>; HRMS Calcd for [C<sub>16</sub>H<sub>13</sub>N<sub>3</sub>O + H]<sup>+</sup>: 264.1131, found: 264.1131.

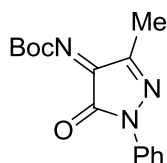



**tert-Butyl (3-methyl-5-oxo-1-phenyl-1,5-dihydro-4H-pyrazol-4-ylidene)carbamate (2b).** Orange solid; mp = 173-175 °C; IR (Capillary): 2979, 2319, 2110, 1722, 1596, 1482, 1369, 1250, 1143, 843, 759 cm<sup>-1</sup>; <sup>1</sup>H NMR (600 MHz, CDCl<sub>3</sub>): δ 7.84-7.82 (m, 2H, ArH), 7.42-7.40 (m, 2H, ArH), 7.24-7.21 (m, 1H, ArH), 2.28 (s, 3H, Me), 1.64 (s, 9H, *t*-Bu); <sup>13</sup>C NMR (151 MHz, CDCl<sub>3</sub>): δ 158.9, 153.9, 150.2, 150.0, 137.0, 129.1 (2C), 126.0, 118.3 (2C), 85.4, 28.1 (3C), 12.1; MS (EI): *m/z* 286.9 M<sup>+</sup>; HRMS Calcd for [C<sub>15</sub>H<sub>17</sub>N<sub>3</sub>O<sub>3</sub> + Na]<sup>+</sup>: 310.1162, found: 310.1161.

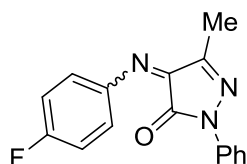

**4-((4-Fluorophenyl)imino)-5-methyl-2-phenyl-2,4-dihydro-3H-pyrazol-3-one (2c).** Red solid; mp = 98-100 °C; IR (Capillary): 3076, 2674, 2345, 2110, 1906, 1694, 1490, 1310, 1231, 1117, 1013, 840, 758, 688, 660 cm<sup>-1</sup>; <sup>1</sup>H NMR (400 MHz, CDCl<sub>3</sub>): δ 7.87 – 7.84 (m, 2H, ArH), 7.60 – 7.57 (m, 2H, ArH), 7.41 – 7.37 (m, 2H, ArH), 7.22 – 7.20 (m, 1H, ArH), 7.13 – 7.09 (m, 2H, ArH), 2.31 (s, 3H, CH<sub>3</sub>); <sup>13</sup>C NMR (101 MHz, CDCl<sub>3</sub>): δ 163.2, 152.0, 151.5, 151.1, 142.0, 137.7, 129.0 (2C), 126.1 (2C), 125.7, 118.6 (2C), 115.7 (2C), 12.4; MS (EI): *m/z* 280.9 M<sup>+</sup>; Elemental Analysis (CHN): calculated for [C<sub>16</sub>H<sub>12</sub>N<sub>3</sub>OF]: C = 68.32%, H = 4.30%, N = 14.94%, found C = 68.15%, H = 4.52%, N = 16.63%.

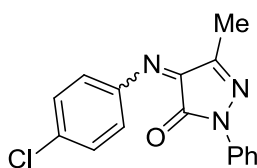

**4-((4-Chlorophenyl)imino)-5-methyl-2-phenyl-2,4-dihydro-3H-pyrazol-3-one (2d).** Red solid; mp = 118- 120 °C; IR (Capillary): 3470, 2972, 2287, 2089, 1887, 1732, 1587, 1484, 1368, 1214, 1084, 1018, 836, 757 cm<sup>-1</sup>; <sup>1</sup>H NMR (600 MHz, CDCl<sub>3</sub>): δ 7.86 (d, *J* = 8.1 Hz, 2H, ArH), 7.42 – 7.37 (m, 6H, ArH), 7.22 (t, *J* = 7.4 Hz, 1H, ArH), 2.33 (s, 3H, CH<sub>3</sub>); <sup>13</sup>C NMR (151 MHz, CDCl<sub>3</sub>): δ 152.8, 151.2, 150.8, 144.5, 137.5, 134.7, 129.0 (2C), 128.9 (2C), 125.7, 123.9 (2C), 118.5 (2C), 12.4; MS (EI): *m/z* 296.8 M<sup>+</sup>; Elemental Analysis (CHN): calculated for [C<sub>16</sub>H<sub>12</sub>N<sub>3</sub>OCl]: C = 64.54%, H = 4.06%, N = 14.11%, found C = 64.73%, H = 4.25%, N = 14.05%.

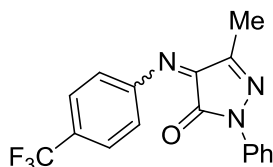

**4-((4-Trifluoromethylphenyl)imino)-5-methyl-2-phenyl-2,4-dihydro-3H-pyrazol-3-one (2e).** Red solid; mp = 155-157 °C; IR (Capillary): 3081, 2653, 2295, 2176, 2111, 2060, 2015, 1926, 1893, 1702, 1592, 1492, 1416, 1309, 1155. 1106, 1058, 840, 755, 692 cm<sup>-1</sup>; <sup>1</sup>H NMR (400 MHz, CDCl<sub>3</sub>): δ 7.84 – 7.81 (m, 2H, ArH), 7.66 (d, *J* = 8.3 Hz, 2H, ArH), 7.40 – 7.36 (m, 2H, ArH), 7.24 – 7.18 (m, 3H, ArH), 2.34 (s, 3H, CH<sub>3</sub>); <sup>13</sup>C NMR (101 MHz, CDCl<sub>3</sub>): δ

154.2, 150.7, 150.3, 149.6, 137.4, 129.2, 129.1 (2C), 126.1 (2C), 125.9, 120.0 (2C), 118.5, 118.4 (2C), 12.3;  $^{19}\text{F}$  NMR (376 MHz,  $\text{CDCl}_3$ ):  $\delta$  -62.4; MS (EI):  $m/z$  331.1  $\text{M}^+$ ; Elemental Analysis (CHN): calculated for  $[\text{C}_{17}\text{H}_{12}\text{N}_3\text{OF}_3]$ : C = 61.63%, H = 3.65%, N = 12.68%, found C = 61.63%, H = 3.64%, N = 12.69%.

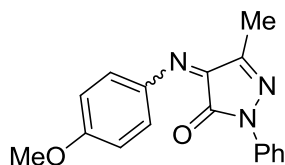

**4-((4-Methoxyphenyl)imino)-5-methyl-2-phenyl-2,4-dihydro-3H-pyrazol-3-one (2f).** Red solid; mp = 111-113 °C; IR (Capillary): 2929, 2661, 2340, 2092, 1906, 1686, 1499, 1253, 1113, 1012, 837, 755  $\text{cm}^{-1}$ ;  $^1\text{H}$  NMR (600 MHz,  $\text{CDCl}_3$ ):  $\delta$  7.95 – 7.91 (m, 4H, ArH), 7.43 – 7.41 (m, 2H, ArH), 7.22 – 7.19 (m, 1H, ArH), 6.97 – 6.89 (m, 2H, ArH), 3.88 (s, 3H,  $\text{OCH}_3$ ), 2.32 (s, 3H,  $\text{CH}_3$ );  $^{13}\text{C}$  NMR (151 MHz,  $\text{CDCl}_3$ ):  $\delta$  162.2, 152.4, 151.6, 148.9, 139.4, 138.0, 129.4 (2C), 129.0 (2C), 125.4, 118.7 (2C), 114.0 (2C), 55.6, 12.5; MS (EI):  $m/z$  292.8  $\text{M}^+$ ; Elemental Analysis (CHN): calculated for  $[\text{C}_{17}\text{H}_{15}\text{N}_3\text{O}_2]$ : C = 69.61%, H = 5.15%, N = 14.33%, found C = 69.58%, H = 5.16%, N = 14.41%.

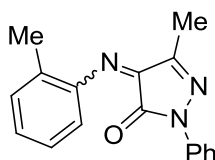

**5-Methyl-2-phenyl-4-(o-tolylimino)-2,4-dihydro-3H-pyrazol-3-one (2g).** Red solid; mp = 71-73 °C; IR (Capillary): 3389, 2920, 2648, 2325, 2093, 1906, 1712, 1594, 1481, 1307, 1151, 1036, 843, 758  $\text{cm}^{-1}$ ;  $^1\text{H}$  NMR (600 MHz,  $\text{CDCl}_3$ ):  $\delta$  7.89 – 7.87 (m, 2H, ArH), 7.41 – 7.38 (m, 2H, ArH), 7.30 – 7.17 (m, 5H, ArH), 2.37 (s, 3H,  $\text{CH}_3$ ), 2.30 (s, 3H,  $\text{CH}_3$ );  $^{13}\text{C}$  NMR (151 MHz,  $\text{CDCl}_3$ ):  $\delta$  152.2, 151.3, 150.6, 145.4, 137.7, 130.8, 129.2, 129.0 (2C), 128.6, 125.8, 125.6, 118.5, 118.4 (2C), 18.2, 12.4; MS (EI):  $m/z$  276.9  $\text{M}^+$ ; HRMS Calcd for  $[\text{C}_{17}\text{H}_{15}\text{N}_3\text{O} + \text{Na}]^+$ : 300.1107, found: 300.1107.

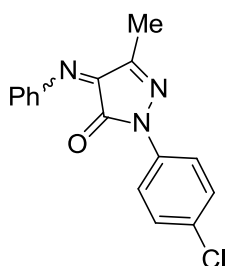

**2-(4-Chlorophenyl)-5-methyl-4-(phenylimino)-2,4-dihydro-3H-pyrazol-3-one (2h).** Red solid (83 mg, 95%); mp = 121-123 °C; IR (Capillary): 3461, 2993, 2678, 2338, 2093, 1902, 1716, 1577, 1479, 1305, 1105, 994, 820  $\text{cm}^{-1}$ ;  $^1\text{H}$  NMR (400 MHz,  $\text{CDCl}_3$ ):  $\delta$  7.85 – 7.83 (m, 2H, ArH), 7.44 – 7.31 (m, 7H, ArH), 2.32 (s, 3H,  $\text{CH}_3$ );  $^{13}\text{C}$  NMR (101 MHz,  $\text{CDCl}_3$ ):  $\delta$  152.2, 151.2, 151.1, 146.2, 136.3, 129.1 (2C), 129.0, 128.7 (2C), 122.03, 122.01, 119.4 (2C), 118.8, 12.4; MS (EI):  $m/z$  296.8  $\text{M}^+$ ; HRMS Calcd for  $[\text{C}_{16}\text{H}_{12}\text{N}_3\text{OCl} + \text{H}]^+$ : 298.0742, found: 298.0742.

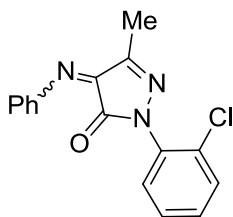

**2-(2-Chlorophenyl)-5-methyl-4-(phenylimino)-2,4-dihydro-3H-pyrazol-3-one (2i).** Red solid; mp = 119-120 °C; IR (Capillary): 3460, 2999, 2332, 2090, 1904, 1737, 1366, 1216, 1061, 885, 739  $\text{cm}^{-1}$ ;  $^1\text{H}$  NMR (600 MHz,  $\text{CDCl}_3$ ):  $\delta$  7.51 – 7.47 (m, 3H, ArH), 7.44 – 7.39 (m, 3H, ArH), 7.35 – 7.31 (m, 3H, ArH), 2.33 (s, 3H,  $\text{CH}_3$ );  $^{13}\text{C}$  NMR (151 MHz,  $\text{CDCl}_3$ ):  $\delta$  151.9, 151.4, 150.9, 146.1, 130.7, 130.1, 129.3, 129.1, 128.7 (2C), 128.6, 127.7, 122.9 (2C), 118.9, 12.5; MS (EI):  $m/z$  296.7  $\text{M}^+$ ; Elemental Analysis (CHN): calculated for  $[\text{C}_{16}\text{H}_{12}\text{N}_3\text{OCl}]$ : C = 64.54%, H = 4.06%, N = 14.11%, found C = 64.52%, H = 4.01%, N = 14.32%.

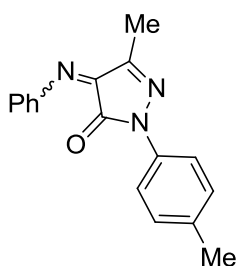

**5-Methyl-4-(phenylimino)-2-(p-tolyl)-2,4-dihydro-3H-pyrazol-3-one (2j).** Red solid; mp = 75-77 °C; IR (Capillary): 3354, 2934, 2702, 2339, 2092, 1907, 1690, 1497, 1306, 1129, 993, 774, 683  $\text{cm}^{-1}$ ;  $^1\text{H}$  NMR (600 MHz,  $\text{CDCl}_3$ ):  $\delta$  7.75 (d,  $J$  = 8.5 Hz, 2H, ArH), 7.44 – 7.42 (m, 2H, ArH), 7.38 – 7.36 (m, 2H, ArH), 7.34 – 7.31 (m, 1H, ArH), 7.20 – 7.19 (m, 2H, ArH), 2.35 (s, 3H,  $\text{CH}_3$ ), 2.33 (s, 3H,  $\text{CH}_3$ );  $^{13}\text{C}$  NMR (151 MHz,  $\text{CDCl}_3$ ):  $\delta$  152.8, 151.1, 150.6, 146.3, 135.3, 135.2, 129.5(2C), 129.1, 128.7(2C), 128.6, 121.8, 118.4 (2C), 21.1, 12.4; MS (EI):  $m/z$  276.9  $\text{M}^+$ ; HRMS Calcd for  $[\text{C}_{17}\text{H}_{15}\text{N}_3\text{O} + \text{Na}]^+$ : 300.1107, found: 300.1107.

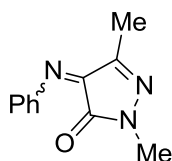

**2,5-Dimethyl-4-(phenylimino)-2,4-dihydro-3H-pyrazol-3-one (2k).** Red wax; IR ( $\text{CDCl}_3$ ): 3339, 2932, 2666, 2340, 2094, 1906, 1705, 1440, 1307, 1218, 1056, 935, 735  $\text{cm}^{-1}$ ;  $^1\text{H}$  NMR (600 MHz,  $\text{CDCl}_3$ ):  $\delta$  7.41 – 7.24 (m, 5H, ArH), 3.28 (s, 3H,  $\text{CH}_3$ ), 2.20 (s, 3H,  $\text{CH}_3$ );  $^{13}\text{C}$  NMR (151 MHz,  $\text{CDCl}_3$ ):  $\delta$  153.0, 152.7, 149.1, 146.3, 128.7 (2C), 122.1 (2C), 115.3, 31.7, 12.2; MS (EI):  $m/z$  201.1  $\text{M}^+$ ; HRMS Calcd for  $[\text{C}_{11}\text{H}_{11}\text{N}_3\text{O} + \text{Na}]^+$ : 224.0794, found: 224.0794.

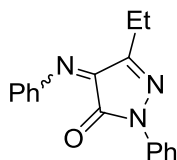

**5-Ethyl-2-phenyl-4-(phenylimino)-2,4-dihydro-3H-pyrazol-3-one (2l).** Red solid; mp = 94-96 °C; IR (Capillary): 3460, 2970, 2663, 2336, 2094, 1912, 1728, 1589, 1479, 1341, 1225, 1117, 1037, 919, 836, 755 cm<sup>-1</sup>; <sup>1</sup>H NMR (600 MHz, CDCl<sub>3</sub>): 7.92 – 7.90 (m, 2H, ArH), 7.45 – 7.32 (m, 6H, ArH), 7.22 – 7.20 (m, 2H, ArH), 2.76 (q, *J* = 7.5 Hz, 2H, CH<sub>2</sub>CH<sub>3</sub>), 1.40 (t, *J* = 7.5 Hz, 3H, CH<sub>2</sub>CH<sub>3</sub>); <sup>13</sup>C NMR (151 MHz, CDCl<sub>3</sub>): δ 154.6, 152.3, 151.3, 146.4, 137.7, 129.0 (2C), 128.7 (2C), 128.5, 125.5, 121.7, 118.4 (2C), 118.3, 20.2, 10.6; MS (EI): *m/z* 276.8 M<sup>+</sup>; HRMS Calcd for [C<sub>17</sub>H<sub>15</sub>N<sub>3</sub>O + Na]<sup>+</sup>: 300.1107, found: 300.1109.

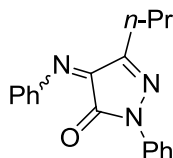

**2-Phenyl-4-(phenylimino)-5-propyl-2,4-dihydro-3H-pyrazol-3-one (2m).** Red Solid; mp = 55-58 °C; IR (Capillary): 3351, 2944, 2338, 2092, 1905, 1703, 102, 1478, 1314, 1101, 894, 753 cm<sup>-1</sup>; <sup>1</sup>H NMR (600 MHz, CDCl<sub>3</sub>): 7.89 – 7.87 (m, 2H, ArH), 7.44 – 7.38 (m, 4H, ArH), 7.35 – 7.30 (m, 3H, ArH), 7.22 – 7.19 (m, 1H, ArH), 2.71 – 2.69 (m, 2H, CH<sub>2</sub>CH<sub>2</sub>CH<sub>3</sub>), 1.89 – 1.83 (m, 2H, CH<sub>2</sub>CH<sub>2</sub>CH<sub>3</sub>), 1.09 (t, *J* = 7.4 Hz, 3H, CH<sub>2</sub>CH<sub>2</sub>CH<sub>3</sub>); <sup>13</sup>C NMR (151 MHz, CDCl<sub>3</sub>): δ 153.7, 152.5, 151.26, 146.5, 137.7, 129.0 (2C), 128.7 (2C), 128.6, 125.6, 121.6 (2C), 118.5 (2C), 28.6, 20.1, 14.1; MS (EI): *m/z* 290.9 M<sup>+</sup>; Elemental Analysis (CHN): calculated for [C<sub>18</sub>H<sub>17</sub>N<sub>3</sub>O]: C = 74.20%, H = 5.88%, N = 14.42%, found C = 74.03%, H = 5.70%, N = 14.44%.

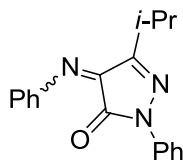

**5-Isopropyl-2-phenyl-4-(phenylimino)-2,4-dihydro-3H-pyrazol-3-one (2n).** Red solid; mp = 77-79 °C; IR (Capillary): 3398, 2959, 2707, 2340, 2093, 1709, 1593, 1467, 1334, 1256, 1102, 977, 835, 747, 685 cm<sup>-1</sup>; <sup>1</sup>H NMR (600 MHz, CDCl<sub>3</sub>): δ 7.92 – 7.91 (m, 2H, ArH), 7.45 – 7.39 (m, 4H, ArH), 7.34 – 7.31 (m, 3H, ArH), 7.22 – 7.19 (m, 1H, ArH), 3.22 – 3.18 (m, 1H, CH(CH<sub>3</sub>)<sub>2</sub>), 1.42 (d, *J* = 7.0 Hz, 6H, CH(CH<sub>3</sub>)<sub>2</sub>); <sup>13</sup>C NMR (151 MHz, CDCl<sub>3</sub>): δ 157.5, 152.0, 151.3, 146.5, 137.8, 129.0 (2C), 128.7 (2C), 128.4, 125.5, 121.4 (2C), 118.4 (2C), 27.1, 20.1 (2C); MS (EI): *m/z* 290.9 M<sup>+</sup>; HRMS Calcd for [C<sub>18</sub>H<sub>17</sub>N<sub>3</sub>O + Na]<sup>+</sup>: 314.1264, found: 314.1264.

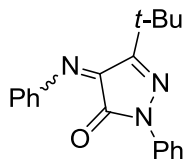

**5-(tert-Butyl)-2-phenyl-4-(phenylimino)-2,4-dihydro-3H-pyrazol-3-one (2o).** Red solid; mp = 95-97 °C; IR (Capillary): 2957, 2340, 2095, 1925, 1717, 1590, 1479, 1375, 1304, 1213, 1108, 963, 839, 689 cm<sup>-1</sup>; <sup>1</sup>H NMR (600 MHz, CDCl<sub>3</sub>): δ 7.93 – 7.91 (m, 2H, ArH), 7.45 – 7.39 (m, 4H, ArH), 7.31 7.29 (m, 1H, ArH), 7.24 – 7.19 (m, 3H, ArH), 1.51 (s, 9H,

$\text{C}(\text{CH}_3)_3$ ;  $^{13}\text{C}$  NMR (151 MHz,  $\text{CDCl}_3$ ):  $\delta$  158.4, 152.0, 150.8, 146.7, 137.7, 128.9 (2C), 128.7 (2C), 127.8, 125.4, 120.3 (2C), 118.3 (2C), 35.1, 28.1(3C); MS (EI):  $m/z$  304.9  $\text{M}^+$ ; HRMS Calcd for  $[\text{C}_{19}\text{H}_{19}\text{N}_3\text{O} + \text{H}]^+$ : 306.1601, found: 306.1602.

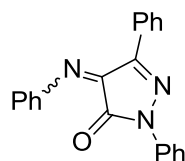

**2,5-Diphenyl-4-(phenylimino)-2,4-dihydro-3H-pyrazol-3-one (2p).** Red solid; mp = 176–178 °C; IR (Capillary): 3449, 3026, 2682, 2338, 2092, 1896, 1714, 1592, 1482, 1399, 1307, 1142, 925, 838, 687  $\text{cm}^{-1}$ ;  $^1\text{H}$  NMR (600 MHz,  $\text{CDCl}_3$ ):  $\delta$  8.32 – 8.30 (m, 2H, ArH), 7.99 – 7.97 (m, 2H, ArH), 7.51 – 7.42 (m, 7H, ArH), 7.35 – 7.21 (m, 3H, ArH), 7.26 – 7.23 (m, 1H, ArH);  $^{13}\text{C}$  NMR (151 MHz,  $\text{CDCl}_3$ ):  $\delta$  152.1, 150.7, 147.1, 146.9, 137.6, 130.8, 129.0 (2C), 128.8 (3C), 128.7 (2C), 128.2, 128.1 (2C), 125.9, 120.6 (2C), 118.7 (2C); MS (EI):  $m/z$  324.8  $\text{M}^+$ ; Elemental Analysis (CHN): Calcd for  $[\text{C}_{21}\text{H}_{15}\text{N}_3\text{O}]$ : C = 77.52%, H = 4.65%, N = 12.91%, found C = 77.69%, H = 4.71%, N = 13.08%.

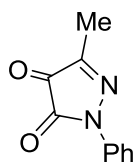

**3-Methyl-1-phenyl-1H-pyrazole-4,5-dione (7).** Red solid; mp = 119–121 °C; IR (Capillary): 3083, 2078, 1765, 1722, 1591, 1492, 1434, 1416, 1370, 1279, 1151, 1086, 1039, 972, 913, 849, 763, 689  $\text{cm}^{-1}$ ;  $^1\text{H}$  NMR (400 MHz,  $\text{CDCl}_3$ ):  $\delta$  7.84 – 7.82 (m, 2H, ArH), 7.44 – 7.40 (m, 2H, ArH), 7.26 – 7.22 (m, 1H, ArH), 2.18 (s, 3H,  $\text{CH}_3$ );  $^{13}\text{C}$  NMR (101 MHz,  $\text{CDCl}_3$ ):  $\delta$  184.6, 149.2, 144.5, 137.0, 129.3 (2C), 126.3, 117.8 (2C), 11.1; MS (EI):  $m/z$  188.1  $\text{M}^+$ ; HRMS Calcd for  $[\text{C}_{10}\text{H}_8\text{N}_2\text{O}_2]^+$ : 188.0580, found: 188.0583.

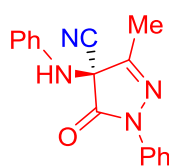

**(R)-3-Methyl-5-oxo-1-phenyl-4-(phenylamino)-4,5-dihydro-1H-pyrazole-4-carbonitrile (3a).** Reddish brown wax (83 mg, 95%);  $[\alpha]_{\text{D}}^{24} = -11.5$  ( $c = 0.6$ ,  $\text{CH}_2\text{Cl}_2$ ); 95.5:4.5 *er*; HPLC: tR 11.08 min (major), 12.44 min (minor), 230 nm, *n*-heptane/*i*-PrOH, 97:3, 0.7 mL/min, Chiralpak IC column; IR ( $\text{CHCl}_3$ ): 3329, 2916, 2314, 2098, 1732, 1467, 1369, 1222, 747  $\text{cm}^{-1}$ ;  $^1\text{H}$  NMR (600 MHz,  $\text{CDCl}_3$ ):  $\delta$  7.85 – 7.83 (m, 2H, ArH), 7.46 – 7.44 (m, 2H, ArH), 7.30 – 7.26 (m, 1H, ArH), 7.22 – 7.20 (m, 2H, ArH), 6.96 (t,  $J = 7.4$  Hz, 1H, ArH), 6.70 – 6.69 (m, 2H, ArH), 4.71 (s, 1H, NH), 2.35 (s, 3H,  $\text{CH}_3$ );  $^{13}\text{C}$  NMR (151 MHz,  $\text{CDCl}_3$ ):  $\delta$  164.7, 154.7, 141.9, 136.9, 129.9 (2C), 129.3 (2C), 126.6, 122.7, 119.2 (2C), 116.6 (2C), 112.4, 62.4, 14.5; MS (EI):  $m/z$  289.9  $\text{M}^+$ ; HRMS Calcd for  $[\text{C}_{17}\text{H}_{14}\text{N}_4\text{O} + \text{Na}]^+$ : 313.1060, found: 313.1061.

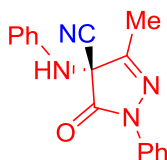

**(S)-3-Methyl-5-oxo-1-phenyl-4-(phenylamino)-4,5-dihydro-1H-pyrazole-4-carbonitrile (*ent*-3a).** Reddish brown wax (75 mg, 86%); 93.9:6.1 *er*; HPLC: tR 11.21 min (minor), 12.51 min (major), 230 nm, *n*-heptane/*i*-PrOH, 97:3, 0.7 mL/min, Chiralpak IC column.

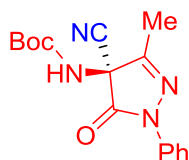

***tert*-Butyl (*R*)-(4-cyano-3-methyl-5-oxo-1-phenyl-4,5-dihydro-1H-pyrazol-4-yl)carbamate (3b).** White Solid (93 mg, 83%); mp = 150 – 152 °C [ $\alpha$ ]<sub>D</sub><sup>24</sup> = –10.0 (*c* = 0.5, CHCl<sub>3</sub>); 62:38 *er*; HPLC: tR 7.73 min (minor), 8.23 min (major), 254 nm, *n*-heptane/*i*-PrOH, 7:3, 0.5 mL/min, Chiralpak IA column; IR (Capillary): 3306, 2980, 2335, 2106, 1715, 1599, 1498, 1364, 1278, 1155, 880, 753 cm<sup>-1</sup>; <sup>1</sup>H NMR (600 MHz, CDCl<sub>3</sub>):  $\delta$  7.86 (d, *J* = 8.1 Hz, 2H, ArH), 7.44 – 7.41 (m, 2H, ArH), 7.26 – 7.24 (m, 1H), 5.98 (s, 1H, NH), 2.30 (s, 3H, CH<sub>3</sub>), 1.39 (br s, 9H, *t*-Bu); <sup>13</sup>C NMR (151 MHz, CDCl<sub>3</sub>):  $\delta$  164.1, 153.1, 137.2, 129.2 (2C), 126.3 (2C), 119.2 (2C), 111.1, 83.6, 58.9, 28.1 (3C), 13.7; MS (EI): *m/z* 314.2 M<sup>+</sup>; HRMS Calcd for [C<sub>16</sub>H<sub>18</sub>N<sub>4</sub>O<sub>3</sub> + Na]<sup>+</sup>: 337.1271, found: 337.1269.

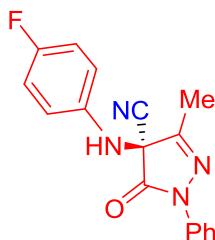

**(*R*)-4-((4-Fluorophenyl)amino)-3-methyl-5-oxo-1-phenyl-4,5-dihydro-1H-pyrazole-4-carbonitrile (3c).** Yellowish brown wax (69 mg, 75%); [ $\alpha$ ]<sub>D</sub><sup>24</sup> = –18.0 (*c* = 0.5, CH<sub>2</sub>Cl<sub>2</sub>); 97.0:3.0 *er*; HPLC: tR 8.27 min (minor), 15.32 min (major), 230 nm, *n*-heptane/*i*-PrOH, 8:2, 1.0 mL/min, Chiralpak AD column; IR (CHCl<sub>3</sub>): 3343, 3052, 2257, 2090, 1724, 1600, 1501, 1363, 1227, 1115, 783 cm<sup>-1</sup>; <sup>1</sup>H NMR (400 MHz, CDCl<sub>3</sub>):  $\delta$  7.79 – 7.76 (m, 2H, ArH), 7.44 – 7.40 (m, 2H, ArH), 7.28 – 7.23 (m, 1H, ArH), 6.93 – 6.89 (m, 2H, ArH), 6.77 – 6.74 (m, 2H), 4.52 (s, 1H, NH), 2.33 (s, 3H, CH<sub>3</sub>); <sup>13</sup>C NMR (101 MHz, CDCl<sub>3</sub>):  $\delta$  164.8, 159.2, 154.3, 137.6, 136.8, 129.3 (2C), 126.6, 120.3 (2C), 119.2 (2C), 116.6 (2C), 112.4, 63.0, 14.5; MS (EI): *m/z* 308.0 M<sup>+</sup>; HRMS Calcd for [C<sub>17</sub>H<sub>13</sub>N<sub>4</sub>OF + Na]<sup>+</sup>: 331.0966, found: 331.0966.

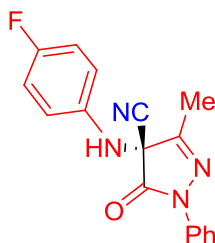

**(S)-4-((4-Fluorophenyl)amino)-3-methyl-5-oxo-1-phenyl-4,5-dihydro-1H-pyrazole-4-carbonitrile (ent-3c).** Yellowish brown wax (64 mg, 69%); 96.9:3.1 *er*; HPLC: tR 8.27 min (major), 15.33 min (minor), 230 nm, *n*-heptane/*i*-PrOH, 8:2, 1.0 mL/min, Chiralpak AD column.

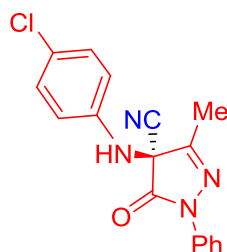

**(R)-4-((4-Chlorophenyl)amino)-3-methyl-5-oxo-1-phenyl-4,5-dihydro-1H-pyrazole-4-carbonitrile (3d).** Light brown wax (78 mg, 80%);  $[\alpha]_D^{24} = -4.0$  ( $c = 0.5$ ,  $\text{CH}_2\text{Cl}_2$ ); 94.4:5.6 *er*; HPLC: tR 6.35 min (minor), 13.32 min (major), 254 nm, *n*-heptane/*i*-PrOH, 7:3, 1.0 mL/min, Chiralpak AD column; IR ( $\text{CHCl}_3$ ): 3305, 2919, 2318, 2100, 1728, 1599, 1473, 1371, 1180, 1089, 812  $\text{cm}^{-1}$ ;  $^1\text{H}$  NMR (600 MHz,  $\text{CDCl}_3$ ):  $\delta$  7.84 – 7.72 (m, 2H, ArH), 7.47 – 7.44 (m, 2H, ArH), 7.31 – 7.28 (m, 1H, ArH), 7.15 – 7.14 (m, 2H, ArH), 6.62 – 6.60 (m, 2H, ArH), 4.87 (s, 1H, NH), 2.34 (s, 3H,  $\text{CH}_3$ );  $^{13}\text{C}$  NMR (151 MHz,  $\text{CDCl}_3$ ):  $\delta$  164.6, 154.5, 140.5, 136.8, 129.8 (2C), 129.3 (2C), 127.8, 126.7, 119.2 (2C), 117.8 (2C), 112.1, 62.3, 14.4; MS (EI):  $m/z$  323.9  $\text{M}^+$ , HRMS Calcd for  $[\text{C}_{17}\text{H}_{13}\text{N}_4\text{OCl} + \text{Na}]^+$ : 347.0670, found: 347.0671.

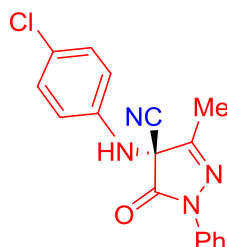

**(S)-4-((4-Chlorophenyl)amino)-3-methyl-5-oxo-1-phenyl-4,5-dihydro-1H-pyrazole-4-carbonitrile (ent-3d).** Light brown wax (77 mg, 79%); 94.4:5.6 *er*; HPLC: tR 6.35 min (major), 13.35 min (minor), 254 nm, *n*-heptane/*i*-PrOH, 7:3, 1.0 mL/min, Chiralpak AD column.

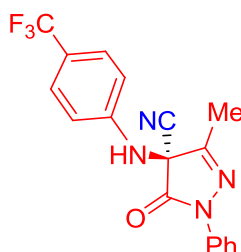

**(R)-4-((4-Trifluoromethylphenyl)amino)-3-methyl-5-oxo-1-phenyl-4,5-dihydro-1H-pyrazole-4-carbonitrile (3e).** Light brown wax (88 mg, 82%);  $[\alpha]_D^{24} = -15.0$  ( $c = 0.4$ ,  $\text{CH}_2\text{Cl}_2$ ); 85.5:15.5 *er*; HPLC: tR 10.35 min (major), 13.81 min (minor), 254 nm, *n*-heptane/*i*-PrOH, 9:1, 1.0 mL/min, Chiralpak IA column; IR ( $\text{CHCl}_3$ ): 3351, 2324, 2085, 1722, 1615,

1530, 1495, 1362, 1321, 1262, 1160, 1100, 1065, 1011, 941, 908, 827, 755, 688  $\text{cm}^{-1}$ ;  $^1\text{H}$  NMR (400 MHz,  $\text{CDCl}_3$ ):  $\delta$  7.87 – 7.84 (m, 2H, ArH), 7.48 – 7.44 (m, 2H, ArH), 7.38 (d,  $J$  = 8.4 Hz, 2H, ArH), 7.32 – 7.28 (m, 1H, ArH), 6.59 (d,  $J$  = 8.4 Hz, 2H, ArH), 5.38 (s, 1H, NH), 2.33 (s, 3H,  $\text{CH}_3$ );  $^{13}\text{C}$  NMR (101 MHz,  $\text{CDCl}_3$ ):  $\delta$  164.4, 154.5, 144.9, 136.8, 129.4 (2C), 127.2 (2C), 126.9, 124.2, 123.7, 119.2 (2C), 114.7, 114.4, 111.7, 61.7, 14.2; MS (EI):  $m/z$  358.4  $\text{M}^+$ , HRMS Calcd for  $[\text{C}_{18}\text{H}_{13}\text{N}_4\text{OF}_3 + \text{K}]^+$ : 397.0673, found: 397.0607.

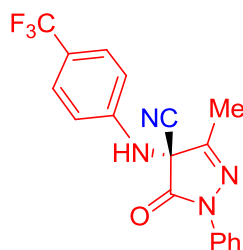

**(S)-4-((4-Trifluoromethylphenyl)amino)-3-methyl-5-oxo-1-phenyl-4,5-dihydro-1H-pyrazole-4-carbonitrile (*ent*-3e).** Light brown wax (86 mg, 80%); 89:11 *er*; HPLC: tR 10.31 min (minor), 13.75 min (major), 254 nm, *n*-heptane/*i*-PrOH, 9:1, 1.0 mL/min, Chiralpak IA column.

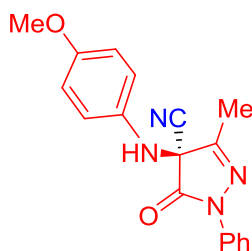

**(R)-4-((4-Methoxyphenyl)amino)-3-methyl-5-oxo-1-phenyl-4,5-dihydro-1H-pyrazole-4-carbonitrile (3f).** Brown wax (58 mg, 60%);  $[\alpha]_{\text{D}}^{24} = -16.7$  ( $c$  = 0.6,  $\text{CH}_2\text{Cl}_2$ ); 97.6:2.4 *er*; HPLC: tR 8.05 min (minor), 17.36 min (major), 254 nm, *n*-heptane/*i*-PrOH, 7:3, 1.0 mL/min, Chiralpak AD column; IR ( $\text{CHCl}_3$ ): 3276, 2910, 2343, 2088, 1731, 1475, 1205, 1056, 789  $\text{cm}^{-1}$ ;  $^1\text{H}$  NMR (600 MHz,  $\text{CDCl}_3$ ):  $\delta$  7.79 – 7.77 (m, 2H, ArH), 7.43–7.41 (m, 2H, ArH), 7.26–7.24 (m, 1H, ArH), 6.85 (d,  $J$  = 9.0 Hz, 2H, ArH), 6.77 (d,  $J$  = 8.9 Hz, 2H, ArH), 4.35 (s, 1H, NH), 3.73 (s, 3H,  $\text{OCH}_3$ ), 2.33 (s, 3H,  $\text{CH}_3$ );  $^{13}\text{C}$  NMR (151 MHz,  $\text{CDCl}_3$ ):  $\delta$  165.2, 156.7, 154.5, 136.8, 134.4, 129.2 (2C), 126.5, 122.2 (2C), 119.2 (2C), 114.9 (2C), 112.7, 63.6, 55.6, 14.7; MS (EI):  $m/z$  319.9  $\text{M}^+$ ; HRMS Calcd for  $[\text{C}_{18}\text{H}_{16}\text{N}_4\text{O}_2 + \text{Na}]^+$ : 343.1165, found: 343.1166.

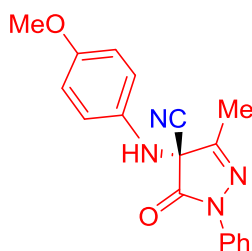

**(S)-4-((4-Methoxyphenyl)amino)-3-methyl-5-oxo-1-phenyl-4,5-dihydro-1H-pyrazole-4-carbonitrile (*ent*-3f).** Brown wax (57 mg, 59%); 96.4:3.6 *er*; HPLC: tR 8.07 min (major), 17.32 min (minor), 254 nm, *n*-heptane/*i*-PrOH, 7:3, 1.0 mL/min, Chiralpak AD column.



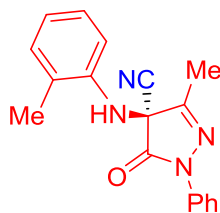

**(R)-4-((2-Methylphenyl)amino)-3-methyl-5-oxo-1-phenyl-4,5-dihydro-1H-pyrazole-4-carbonitrile (3g).** Brown wax (35 mg, 38%);  $[\alpha]_D^{24} = -26.7$  ( $c = 0.6$ ,  $\text{CH}_2\text{Cl}_2$ ); 93.5:6.5 *er*; HPLC: tR 5.27 min (minor), 6.37 min (major), 254 nm, *n*-heptane/*i*-PrOH, 7:3, 1.0 mL/min, Chiralpak AD column; IR ( $\text{CHCl}_3$ ): 3325, 2969, 2334, 2098, 1737, 1600, 1365, 1216, 1053, 906, 750  $\text{cm}^{-1}$ ;  $^1\text{H}$  NMR (600 MHz,  $\text{CDCl}_3$ ):  $\delta$  7.97 – 7.85 (m, 2H, ArH), 7.47 – 7.44 (m, 2H, ArH), 7.30 – 7.27 (m, 1H, ArH), 7.15 (d,  $J = 7.2$  Hz, 1H, ArH), 7.05 – 7.02 (m, 1H, ArH), 6.89 – 6.86 (m, 1H, ArH), 6.44 (dd,  $J = 8.0, 1.1$  Hz, 1H, ArH), 4.41 (s, 1H, NH), 2.32 (s, 3H,  $\text{CH}_3$ ), 2.29 (s, 3H,  $\text{CH}_3$ );  $^{13}\text{C}$  NMR (151 MHz,  $\text{CDCl}_3$ ):  $\delta$  164.8, 154.8, 140.2, 137.0, 131.4, 129.3 (2C), 127.6, 126.6, 125.9, 122.3, 119.2 (2C), 113.2, 112.6, 62.3, 17.7, 14.5; MS (EI):  $m/z$  303.9  $\text{M}^+$ ; HRMS Calcd for  $[\text{C}_{18}\text{H}_{16}\text{N}_4\text{O} + \text{Na}]^+$ : 327.1216, found: 327.1219.

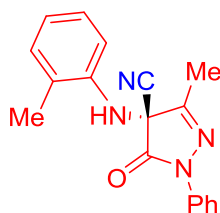

**(S)-4-((2-Methylphenyl)amino)-3-methyl-5-oxo-1-phenyl-4,5-dihydro-1H-pyrazole-4-carbonitrile (ent-3g).** Brown wax (34 mg, 37%); 92.0:8.0 *er*; HPLC: tR 5.27 min (major), 6.37 min (minor), 254 nm, *n*-heptane/*i*-PrOH, 7:3, 1.0 mL/min, Chiralpak AD column.

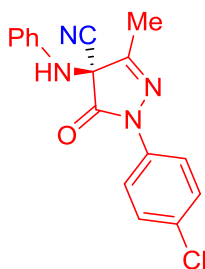

**(R)-1-(4-Chlorophenyl)-3-methyl-5-oxo-4-(phenylamino)-4,5-dihydro-1H-pyrazole-4-carbonitrile (3h).** Light brown solid (76 mg, 78%); mp = 131-134  $^{\circ}\text{C}$ ;  $[\alpha]_D^{24} = -8.2$  ( $c = 0.6$ ,  $\text{CH}_2\text{Cl}_2$ ); 97.5:2.5 *er*; HPLC: 8.74 min (minor), tR 26.88 min (major), 214 nm, *n*-heptane/*i*-PrOH, 7:3, 1.0 mL/min, ChiralCel AD column; IR ( $\text{CHCl}_3$ ): 3322, 3040, 2320, 2061, 1717, 1605, 1491, 1356, 1254, 1157, 1089, 1011, 830, 751  $\text{cm}^{-1}$ ;  $^1\text{H}$  NMR (600 MHz,  $\text{CDCl}_3$ ):  $\delta$  7.82 – 7.79 (m, 2H, ArH), 7.41 – 7.39 (m, 2H, ArH), 7.22 – 7.20 (m, 2H, ArH), 6.98 – 6.96 (m, 1H, ArH), 6.69 – 6.67 (m, 2H, ArH), 4.64 (s, 1H, NH), 2.35 (s, 3H,  $\text{CH}_3$ );  $^{13}\text{C}$  NMR (151 MHz,  $\text{CDCl}_3$ ):  $\delta$  164.6, 155.1, 141.8, 135.5, 131.8, 130.0 (2C), 129.4 (2C), 122.9, 120.2 (2C), 116.7 (2C), 112.2, 62.4, 14.5; MS (EI):  $m/z$  323.9  $\text{M}^+$ , HRMS Calcd for  $[\text{C}_{17}\text{H}_{13}\text{N}_4\text{OCl} + \text{H}]^+$ : 325.0851, found: 325.0846.

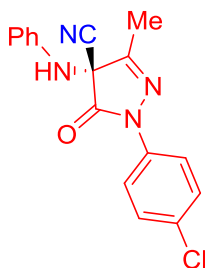

**(S)-1-(4-Chlorophenyl)-3-methyl-5-oxo-4-(phenylamino)-4,5-dihydro-1H-pyrazole-4-carbonitrile (*ent*-3h).** Light brown solid (76 mg, 78%); 97.0:3.0 *er*; HPLC: tR 8.70 min (major), 26.63 min (minor), 214 nm, *n*-heptane/*i*-PrOH, 7:3, 1.0 mL/min, Chiralpak AD column.

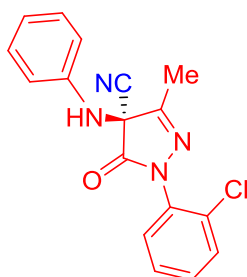

**(R)-1-(2-Chlorophenyl)-3-methyl-5-oxo-4-(phenylamino)-4,5-dihydro-1H-pyrazole-4-carbonitrile (3i).** White Solid (85 mg, 87%); mp = 128-130 °C;  $[\alpha]_D^{24} = +15.0$  (c = 1.0, CH<sub>2</sub>Cl<sub>2</sub>); 97:3 *er*; HPLC: tR 3.14 min (major), 3.70 min (minor), 230 nm, *n*-heptane/*i*-PrOH, 8:2, 1.0 mL/min, Chiralpak IC column; IR (CHCl<sub>3</sub>): 3330, 3006, 2313, 2105, 1739, 1600, 1485, 1368, 1219, 1075, 864, 746 cm<sup>-1</sup>; <sup>1</sup>H NMR (400 MHz, CDCl<sub>3</sub>): δ 7.52 – 7.49 (m, 1H, ArH), 7.39 – 7.32 (m, 3H, ArH), 7.24 – 7.20 (m, 2H, ArH), 7.00 – 6.98 (m, 1H, ArH), 6.79 – 6.77 (m, 2H, ArH), 4.68 (s, 1H, NH), 2.32 (s, 3H, CH<sub>3</sub>); <sup>13</sup>C NMR (101 MHz, CDCl<sub>3</sub>): δ 165.5, 154.6, 141.9, 133.3, 132.0, 130.9, 130.8, 129.8 (2C), 128.6, 127.8, 122.9, 117.2 (2C), 112.3, 61.2, 14.4; MS (EI): *m/z* 323.9 M<sup>+</sup>; Elemental Analysis (CHN): calculated for [C<sub>17</sub>H<sub>13</sub>N<sub>4</sub>OCl]: C = 62.87%, H = 4.03%, N = 17.25%, found C = 62.87%, H = 3.96%, N = 17.29%.

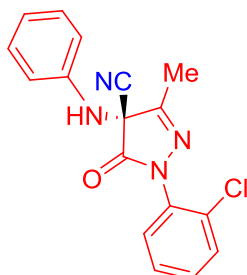

**(R)-1-(2-Chlorophenyl)-3-methyl-5-oxo-4-(phenylamino)-4,5-dihydro-1H-pyrazole-4-carbonitrile (*ent*-3i).** White solid (85 mg, 87%); 96:4 *er*; HPLC: tR 3.14 min (minor), 3.70 min (major), 230 nm, *n*-heptane/*i*-PrOH, 8:2, 1.0 mL/min, Chiralpak IC column.

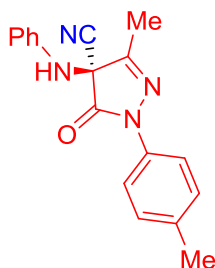

**(R)-3-Methyl-5-oxo-4-(phenylamino)-1-(p-tolyl)-4,5-dihydro-1H-pyrazole-4-carbonitrile (3j).** Reddish brown wax (72 mg, 79%);  $[\alpha]_D^{24} = -18.0$  ( $c = 1.0$ ,  $\text{CH}_2\text{Cl}_2$ ); 97:3 *er*; HPLC: tR 11.86 min (minor), 43.87 min (major), 230 nm, *n*-heptane/*i*-PrOH, 7:3, 1.0 mL/min, ChiralCel AD column; IR ( $\text{CHCl}_3$ ): 3319, 2929, 2312, 2088, 1715, 1603, 1505, 1358, 1271, 1139, 815, 749, 690  $\text{cm}^{-1}$ ;  $^1\text{H}$  NMR (600 MHz,  $\text{CDCl}_3$ ):  $\delta$  7.72 – 7.70 (m, 2H, ArH), 7.26 – 7.24 (m, 2H, ArH), 7.21 – 7.18 (m, 2H, ArH), 6.95 (t,  $J = 7.5$  Hz, 1H, ArH), 6.69 – 6.67 (m, 2H, ArH), 4.78 (s, 1H, NH), 2.38 (s, 3H,  $\text{CH}_3$ ), 2.34 (s, 3H,  $\text{CH}_3$ );  $^{13}\text{C}$  NMR (151 MHz,  $\text{CDCl}_3$ ):  $\delta$  164.6, 154.6, 142.0, 136.5, 134.5, 129.8 (2C), 129.7 (2C), 122.5, 119.3 (2C), 116.5 (2C), 112.4, 62.3, 21.1, 14.4; MS (ESI):  $m/z$  303.9  $\text{M}^+$ ; HRMS Calcd for  $[\text{C}_{18}\text{H}_{16}\text{N}_4\text{O} + \text{Na}]^+$ : 327.1216, found: 327.1218.

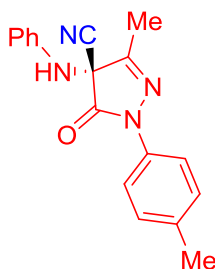

**(S)-3-Methyl-5-oxo-4-(phenylamino)-1-(p-tolyl)-4,5-dihydro-1H-pyrazole-4-carbonitrile (ent-3j).** Reddish brown wax (68 mg, 75%); 96:4 *er*; HPLC: tR 11.84 min (major), 43.18 min (minor), 230 nm, *n*-heptane/*i*-PrOH, 7:3, 1.0 mL/min, Chiralpak AD column.

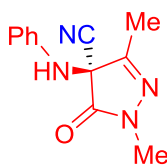

**(R)-1,3-Dimethyl-5-oxo-4-(phenylamino)-4,5-dihydro-1H-pyrazole-4-carbonitrile (3k).** Brown wax (63 mg, 92%);  $[\alpha]_D^{24} = -34.9$  ( $c = 0.6$ ,  $\text{CH}_2\text{Cl}_2$ ); 96.5:3.5 *er*; HPLC: tR 4.76 min (minor), 5.86 min (major), 254 nm, *n*-heptane/*i*-PrOH, 7:3, 1.0 mL/min, Chiralpak AD column; IR ( $\text{CHCl}_3$ ): 3369, 3013, 2277, 2088, 1725, 1601, 1493, 1375, 1221, 1034, 920, 746  $\text{cm}^{-1}$ ;  $^1\text{H}$  NMR (600 MHz,  $\text{CDCl}_3$ ):  $\delta$  7.22 – 7.20 (m, 2H, ArH), 6.99 – 6.92 (m, 1H, ArH), 6.65 – 6.63 (m, 2H), 4.59 (s, 1H, NH), 3.37 (s, 3H, N- $\text{CH}_3$ ), 2.22 (s, 3H,  $\text{CH}_3$ );  $^{13}\text{C}$  NMR (151 MHz,  $\text{CDCl}_3$ ):  $\delta$  166.5, 153.8, 142.0, 129.7 (2C), 122.3, 116.3 (2C), 112.3, 60.6, 32.3, 14.2; MS (EI):  $m/z$  228.0  $\text{M}^+$ ; Elemental Analysis (CHN): calculated for  $[\text{C}_{12}\text{H}_{12}\text{N}_4\text{O}]$ : C = 63.15%, H = 5.30%, N = 24.55%, found C = 63.09%, H = 5.16%, N = 24.47%.

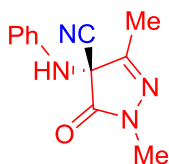

**(S)-1,3-Dimethyl-5-oxo-4-(phenylamino)-4,5-dihydro-1H-pyrazole-4-carbonitrile (ent-3k).** Brown wax (63 mg, 92%); 97.5:2.5 *er*; HPLC: tR 4.77 min (major), 5.86 min (minor), 254 nm, *n*-heptane/*i*-PrOH, 7:3, 1.0 mL/min, Chiralpak AD column.

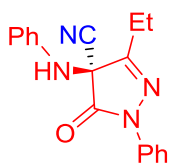

**(R)-3-Ethyl-5-oxo-1-phenyl-4-(phenylamino)-4,5-dihydro-1H-pyrazole-4-carbonitrile (3l).** Brown wax (74 mg, 81%);  $[\alpha]_D^{24} = -4.0$  ( $c = 0.5$ ,  $\text{CH}_2\text{Cl}_2$ ); 96.5:3.5 *er*; HPLC: tR 8.03 min (minor), 21.64 min (major), 254 nm, *n*-heptane/*i*-PrOH, 7:3, 1.0 mL/min, Chiralpak AD column; IR ( $\text{CHCl}_3$ ): 3316, 2929, 2102, 1724, 1600, 1494, 1349, 1207, 1051, 909, 833, 747, 686  $\text{cm}^{-1}$ ;  $^1\text{H}$  NMR (400 MHz,  $\text{CDCl}_3$ ):  $\delta$  7.88 – 7.85 (m, 2H, ArH), 7.46 – 7.42 (m, 2H, ArH), 7.29 – 2.27 m, 1H, ArH), 7.19 – 7.15 (m, 2H, ArH), 6.94 – 6.91 (m, 1H, ArH), 6.64 – 6.62 (m, 2H, ArH), 4.82 (s, 1H, NH), 2.75 – 2.60 (m, 2H,  $\text{CH}_2\text{CH}_3$ ), 1.36 (t,  $J = 7.3$  Hz, 3H,  $\text{CH}_2\text{CH}_3$ );  $^{13}\text{C}$  NMR (101 MHz,  $\text{CDCl}_3$ ):  $\delta$  165.0, 158.8, 142.1, 137.1, 129.8 (2C), 129.2 (2C), 126.5, 122.4, 119.2 (2C), 116.2 (2C), 112.6, 62.2, 22.2, 9.4; MS (EI):  $m/z$  303.9  $\text{M}^+$ ; Elemental Analysis (CHN): calculated for  $[\text{C}_{18}\text{H}_{16}\text{N}_4\text{O}]$ : C = 71.04%, H = 5.30%, N = 18.41%, found C = 70.93%, H = 5.29%, N = 18.53%.

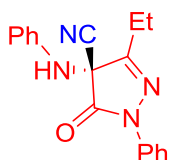

**(S)-3-Ethyl-5-oxo-1-phenyl-4-(phenylamino)-4,5-dihydro-1H-pyrazole-4-carbonitrile (ent-3l).** Brown wax (72 mg, 79%); 95.5:5.5 *er*; HPLC: tR 8.02 min (major), 21.65 min (minor), 254 nm, *n*-heptane/*i*-PrOH, 7:3, 1.0 mL/min, Chiralpak AD column.

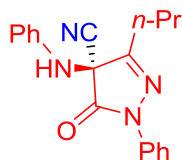

**(R)-3-*n*-Propyl-5-oxo-1-phenyl-4-(phenylamino)-4,5-dihydro-1H-pyrazole-4-carbonitrile (3m).** Brown wax (72 mg, 75%);  $[\alpha]_D^{24} = -26.0$  ( $c = 0.5$ ,  $\text{CH}_2\text{Cl}_2$ ); 98:2 *er*; HPLC: tR 9.04 min (minor), 21.19 min (major), 230 nm, *n*-heptane/*i*-PrOH, 8:2, 1.0 mL/min, Chiralpak AD column; IR ( $\text{CHCl}_3$ ): 3351, 2955, 2329, 2100, 1730, 1598, 1493, 1355, 1219, 1111, 885, 748  $\text{cm}^{-1}$ ;  $^1\text{H}$  NMR (400 MHz,  $\text{CDCl}_3$ ):  $\delta$  7.85 (d,  $J = 8.1$  Hz, 2H, ArH), 7.46 – 7.42 (m, 2H, ArH), 7.28 – 7.24 (m, 1H, ArH), 7.20 – 7.15 (m, 2H, ArH), 6.92 (t,  $J = 7.4$  Hz, 1H, ArH), 6.63 – 6.61 (m, 2H, ArH), 4.78 (s, 1H, NH), 2.69 – 2.51 (m, 2H,  $\text{CH}_2\text{CH}_2\text{CH}_3$ ), 1.80 – 1.82

(m, 2H, CH<sub>2</sub>CH<sub>2</sub>CH<sub>3</sub>), 1.05 (t,  $J$  = 7.3 Hz, 3H CH<sub>2</sub>CH<sub>2</sub>CH<sub>3</sub>); <sup>13</sup>C NMR (101 MHz, CDCl<sub>3</sub>): δ 164.9, 157.8, 142.1, 137.10, 129.8 (2C), 129.2 (2C), 126.5, 122.4, 119.2 (2C), 116.2 (2C), 112.6, 62.2, 30.5, 18.8, 13.8.; MS (EI):  $m/z$  318.0 M<sup>+</sup>; HRMS Calcd for [C<sub>19</sub>H<sub>18</sub>N<sub>4</sub>O + Na]<sup>+</sup>: 341.1373, found: 341.1372.

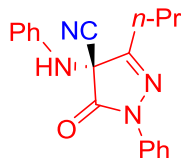

**(S)-3-*n*-Propyl-5-oxo-1-phenyl-4-(phenylamino)-4,5-dihydro-1H-pyrazole-4-carbonitrile (ent-3m).** Brown wax (71 mg, 74%); 98.0:2.0 *er*; HPLC: tR 9.04 min (major), 21.15 min (minor), 234 nm, *n*-heptane/*i*-PrOH, 8:2, 1.0 mL/min, Diacel AD column.

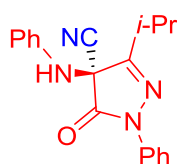

**(R)-3-*iso*-Propyl-5-oxo-1-phenyl-4-(phenylamino)-4,5-dihydro-1H-pyrazole-4-carbonitrile (3n).** Light brown wax (54 mg, 56%); mp = 73 – 75 °C;  $[\alpha]_D^{24}$  = –16.7 ( $c$  = 0.6, CH<sub>2</sub>Cl<sub>2</sub>); 98.5:1.5 *er*; HPLC: 8.16 min (minor), tR 20.83 min (major), 254 nm, *n*-heptane/*i*-PrOH, 7:3, 1.0 mL/min, ChiralCel AD column; IR (CHCl<sub>3</sub>): 3309, 2925, 2326, 2016, 1717, 1599, 1494, 1349, 1080, 911, 749 cm<sup>-1</sup>; <sup>1</sup>H NMR (600 MHz, CDCl<sub>3</sub>): δ 7.88 (dd,  $J$  = 9.0, 1.2 Hz, 2H, ArH), 7.47 – 7.44 (m, 2H, ArH), 7.23 – 7.27 (m, 1H, ArH), 7.16 – 7.18 (m, 2H, ArH), 6.91 (t,  $J$  = 7.2 Hz, 1H), 6.56 – 6.54 (m, 2H, ArH), 4.85 (s, 1H, NH), 2.95 (hept,  $J$  = 6.9 Hz, 1H, CH), 1.48 (d,  $J$  = 6.9 Hz, 3H, CH<sub>3</sub>), 1.32 (d,  $J$  = 6.9 Hz, 3H, CH<sub>3</sub>); <sup>13</sup>C NMR (151 MHz, CDCl<sub>3</sub>): δ 165.0, 162.0, 142.3, 137.2, 129.9 (2C), 129.3 (2C), 126.5, 122.1, 119.2 (2C), 115.6 (2C), 112.9, 61.7, 29.6, 21.3, 19.6; MS (EI):  $m/z$  318.0 M<sup>+</sup>; HRMS Calcd for [C<sub>19</sub>H<sub>18</sub>N<sub>4</sub>O + Na]<sup>+</sup>: 341.1373, found: 341.1388.

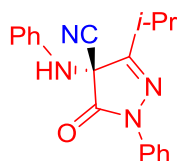

**(S)-3-*iso*-Propyl-5-oxo-1-phenyl-4-(phenylamino)-4,5-dihydro-1H-pyrazole-4-carbonitrile (ent-3n).** Light brown wax (52 mg, 54%); 99:1.0 *er*; HPLC: tR 8.14 min (major), 21.01 min (minor), 254 nm, *n*-heptane/*i*-PrOH, 7:3, 1.0 mL/min, Chiralpak AD column.

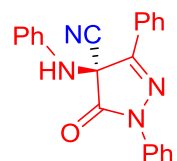

**(R)-5-Oxo-1,3-diphenyl-4-(phenylamino)-4,5-dihydro-1H-pyrazole-4-carbonitrile (3p).** Reddish brown wax (15 mg, 14%);  $[\alpha]_D^{24}$  = –20.0 ( $c$  = 0.3, CH<sub>2</sub>Cl<sub>2</sub>); 92.8:7.2 *er*; HPLC: tR

28.49 min (minor), 32.03 min (major), 254 nm, *n*-heptane/*i*-PrOH, 97:3, 0.5 mL/min, Chiralpak OD column; IR (CHCl<sub>3</sub>): 3347, 3050, 2918, 2638, 2453, 2299, 2078, 1988, 1718, 1598, 1493, 1376, 1296, 1114, 909, 751, 687 cm<sup>-1</sup>; <sup>1</sup>H NMR (600 MHz, CDCl<sub>3</sub>): δ 8.20 – 8.18 (m, 2H, ArH), 7.87 – 7.85 (m, 2H, ArH), 7.56 – 7.52 (m, 3H, ArH), 7.47 – 7.44 (m, 2H, ArH), 7.31 – 7.28 (m, 1H, ArH), 7.18 – 7.15 (m, 2H, ArH), 6.97 – 6.94 (m, 1H, ArH), 6.85 – 6.83 (m, 2H, ArH), 4.71 (s, 1H, NH); <sup>13</sup>C NMR (151 MHz, CDCl<sub>3</sub>): δ 165.1, 151.3, 141.6, 136.9, 132.2, 129.7 (2C), 129.4 (2C), 129.3 (2C), 127.9, 127.0 (2C), 126.8, 123.5, 119.5 (2C), 118.7 (2C), 113.1, 61.5; MS (ESI): *m/z* 351.9 M<sup>+</sup>; HRMS Calcd for [C<sub>22</sub>H<sub>16</sub>N<sub>4</sub>O + H]<sup>+</sup>: 353.1397, found: 353.1390.

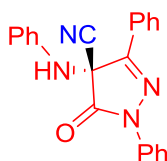

**(S)-5-Oxo-1,3-diphenyl-4-(phenylamino)-4,5-dihydro-1H-pyrazole-4-carbonitrile (3p).** Reddish brown wax (14 mg, 13%); 92.0:8.0 *er*; HPLC: tR 28.27 min (major), 31.91 min (minor), 254 nm, *n*-heptane/*i*-PrOH, 97:3, 0.5 mL/min, Chiralcel OD column.

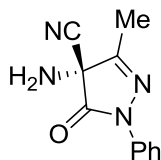

**(S)-4-Amino-3-methyl-5-oxo-phenyl-4,5-dihydro-1H-pyrazole-4-carbonitrile (4).** Brown wax (30 mg, 70%); [α]<sub>D</sub><sup>24</sup> = -11.5 (c = 0.5, CHCl<sub>3</sub>); 96.3:3.4 *er*; HPLC: tR 6.31 min (major), 7.61 min (minor), 254 nm, *n*-heptane/*i*-PrOH, 8:2, 1.0 mL/min, Chiralpak AD column; IR (CHCl<sub>3</sub>): 3842, 2679, 2344, 2092, 1752, 1140 cm<sup>-1</sup>; <sup>1</sup>H NMR (400 MHz, CDCl<sub>3</sub>): δ 7.81 – 7.79 (m, 2H, ArH), 7.43 – 7.39 (m, 2H, ArH), 7.26 – 7.22 (m, 1H, ArH), 2.32 (s, 3H, CH<sub>3</sub>), 2.30 – 2.20 (m, 2H, NH<sub>2</sub>); <sup>13</sup>C NMR (151 MHz, CDCl<sub>3</sub>): δ 166.1, 154.9, 136.9, 129.2 (2C), 126.4, 119.1 (2C), 114.4, 58.8, 13.6; MS (ED): *m/z* 214.2; HRMS Calcd for [C<sub>11</sub>H<sub>10</sub>N<sub>4</sub>O + H]<sup>+</sup>: 215.0927, found: 215.0929.

# NMR Spectra:

PROTON\_01  
e/chaohan\_pc1022

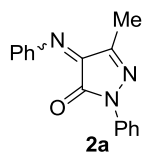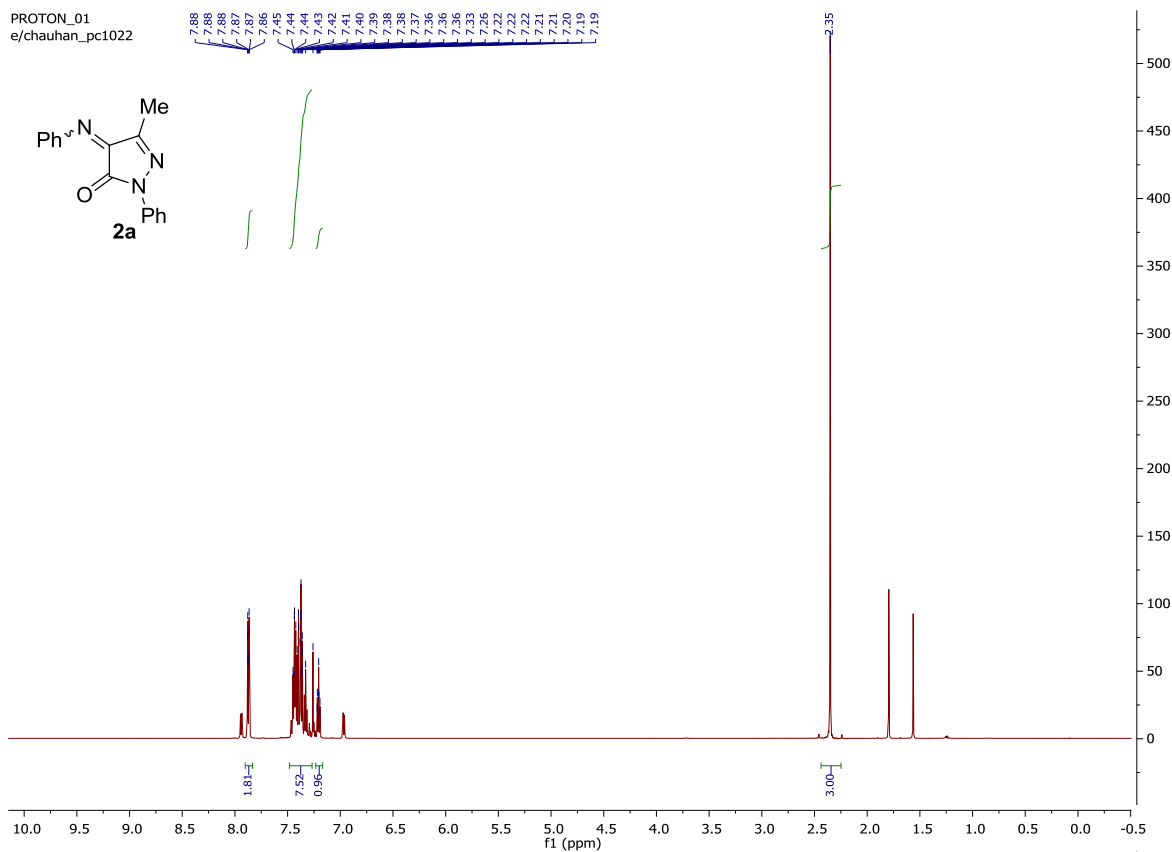

CARBON\_01  
e/chaohan\_pc1022

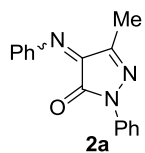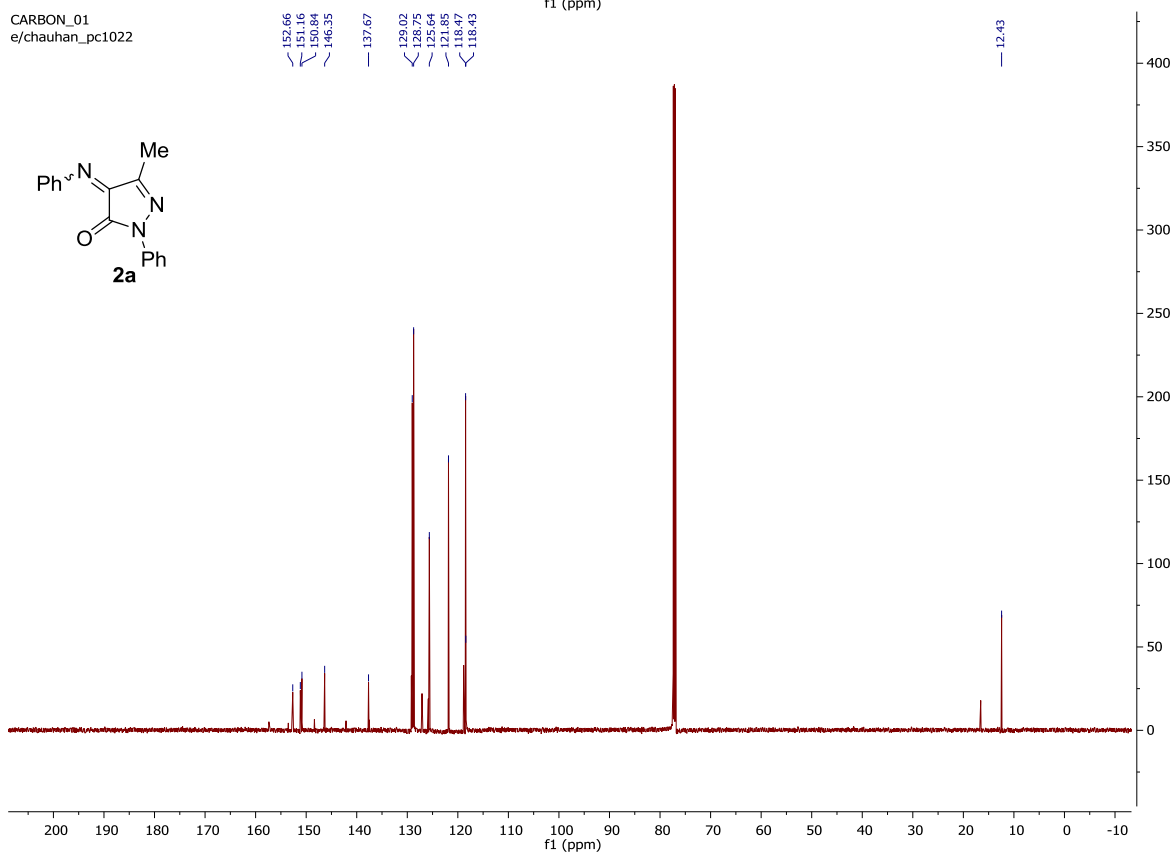

PROTON\_01  
e/Mahajan\_SM214rep3

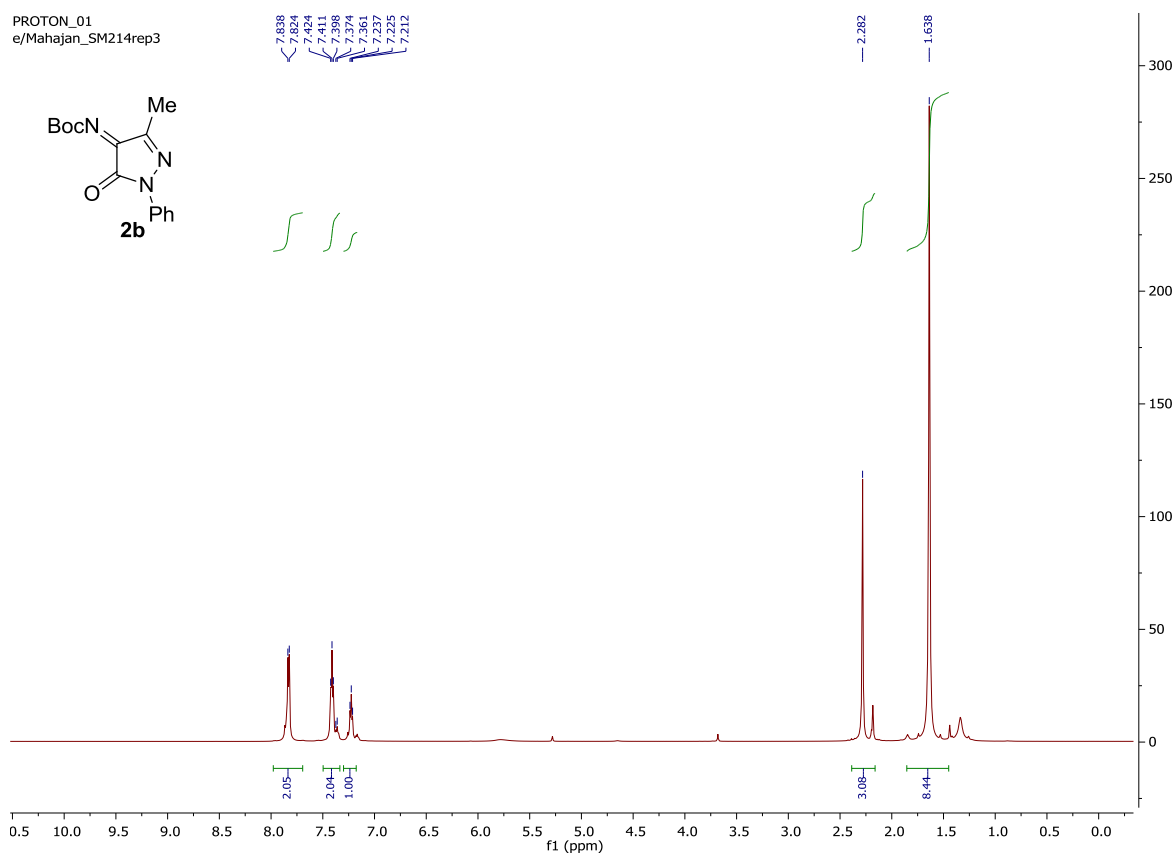

CARBON\_01  
e/Mahajan\_SM214rep3

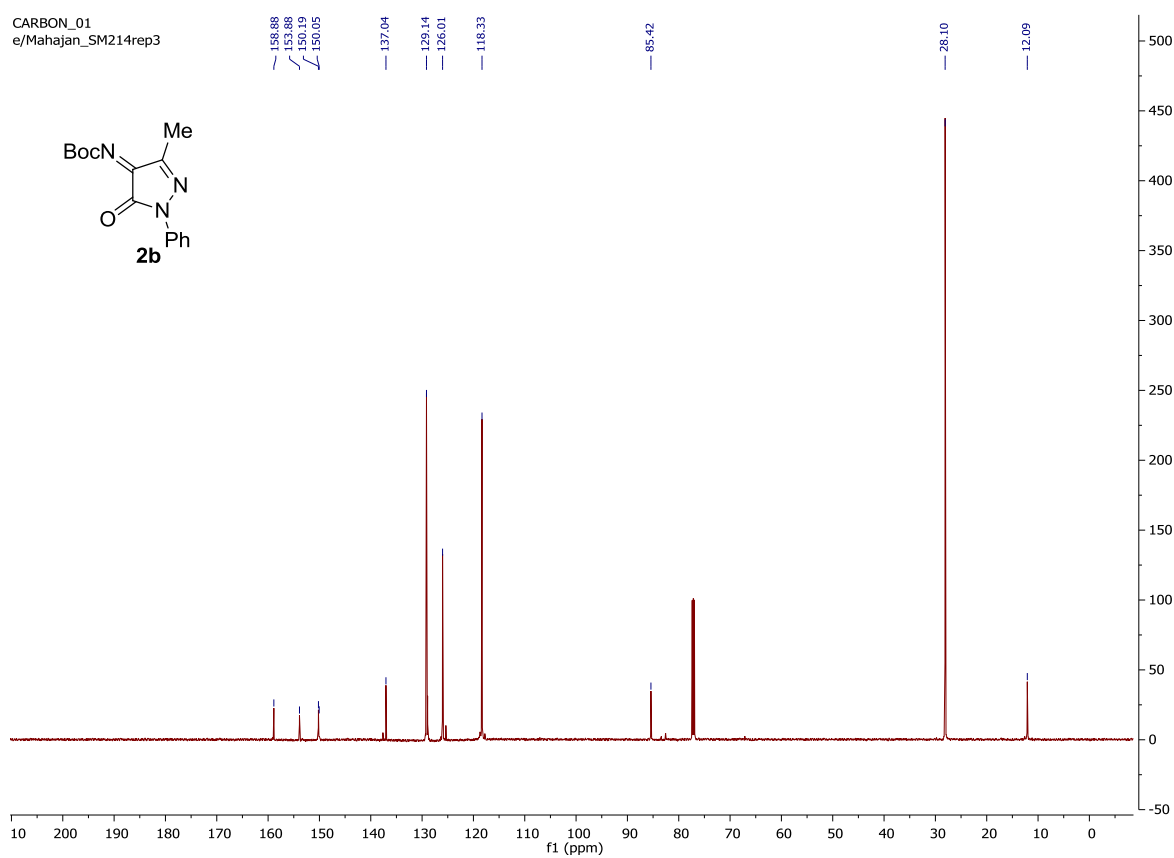





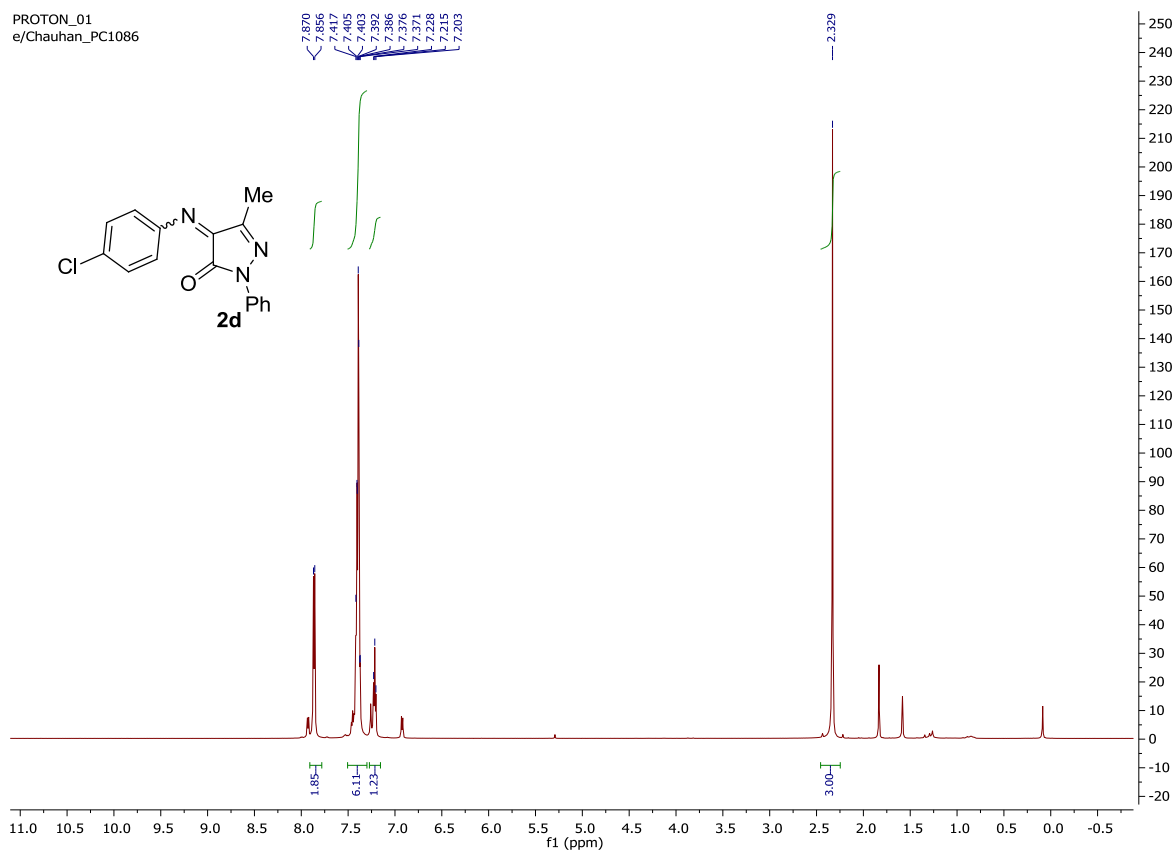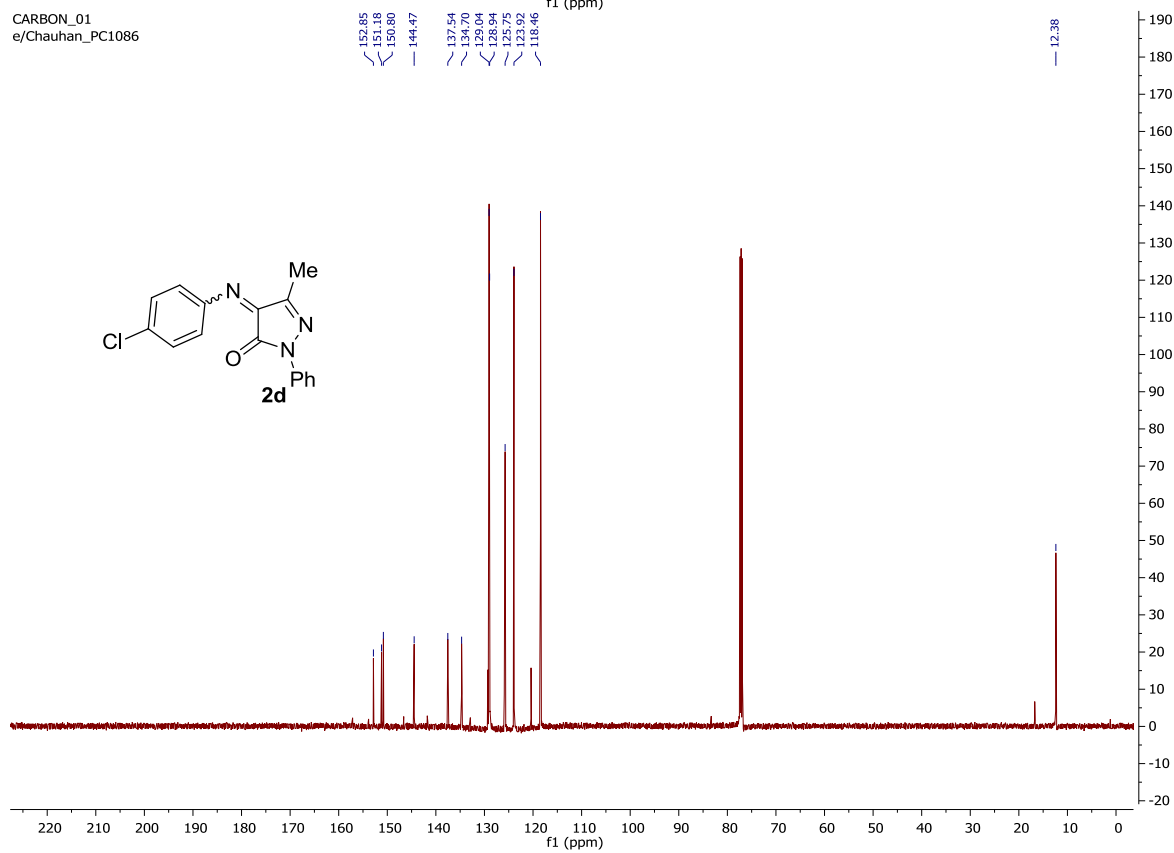

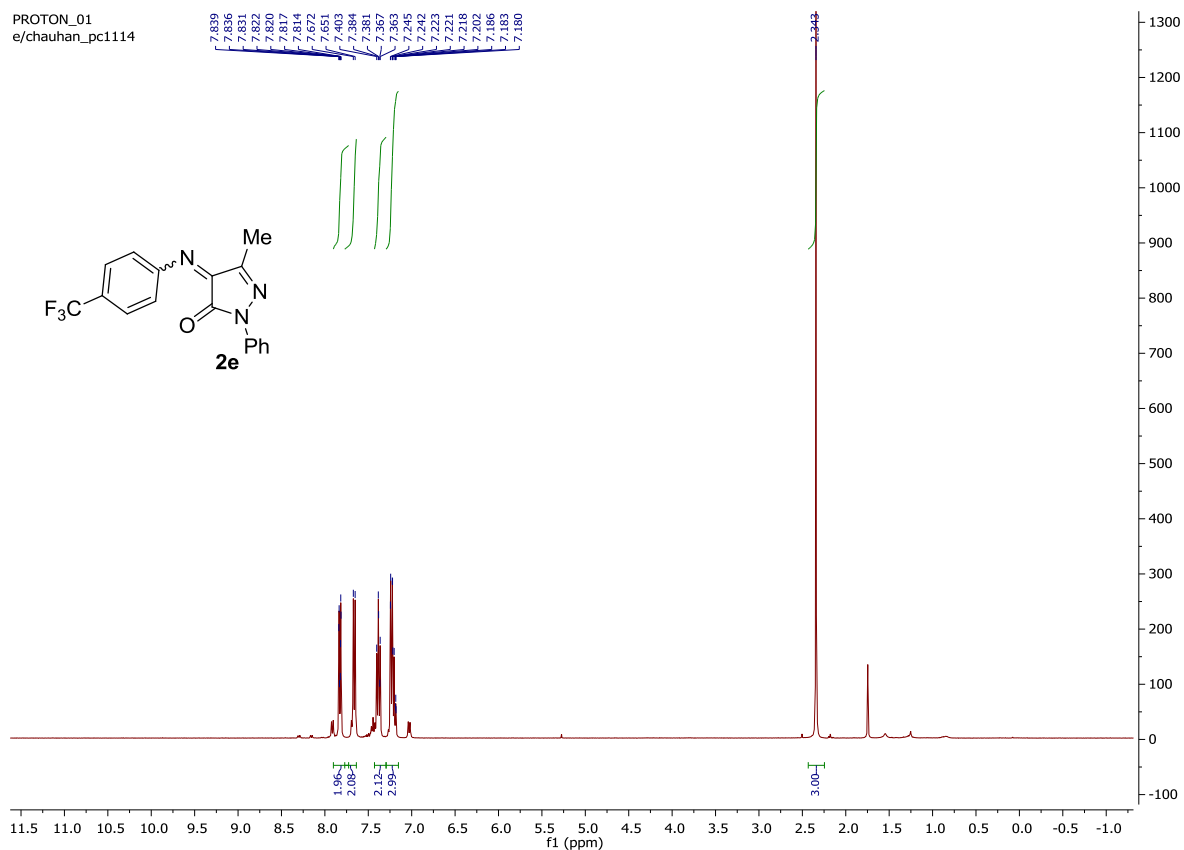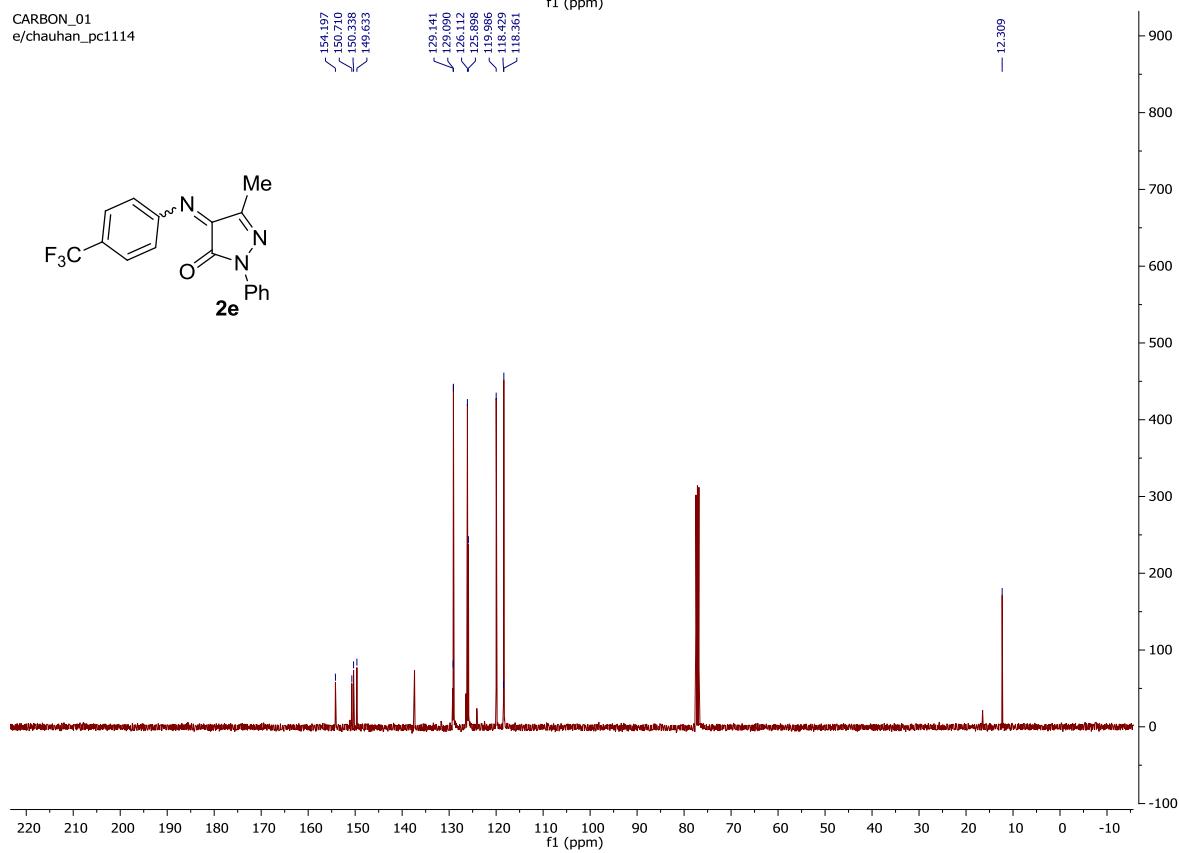

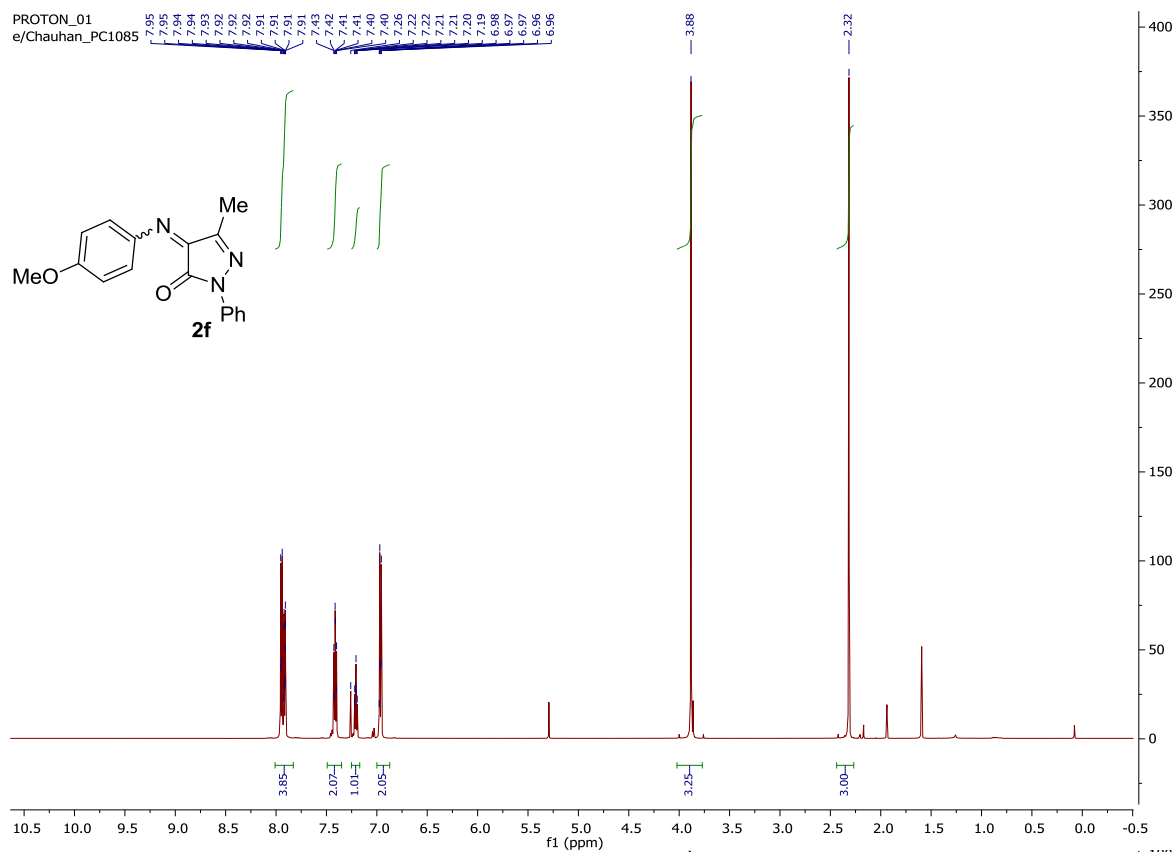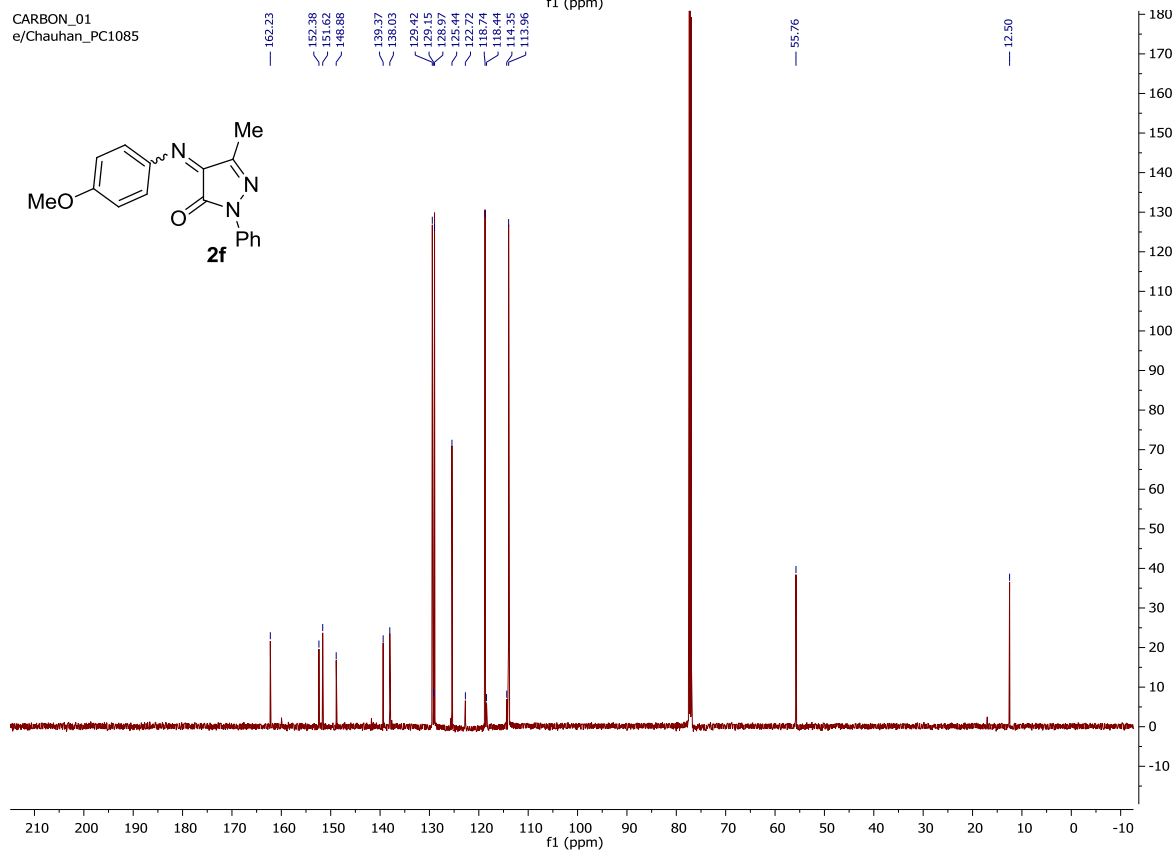

PROTON\_01  
e/Chauhan\_PC1075R4

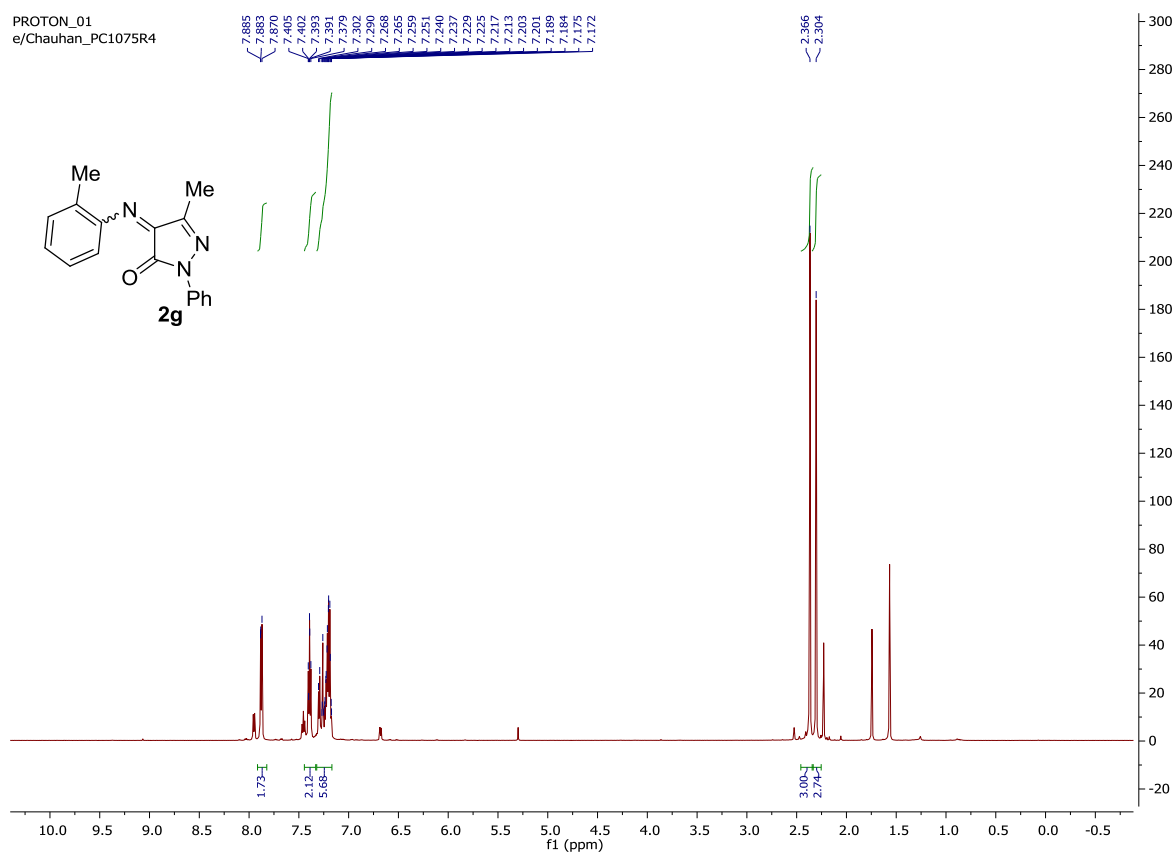

CARBON\_01  
e/Chauhan\_PC1075R4

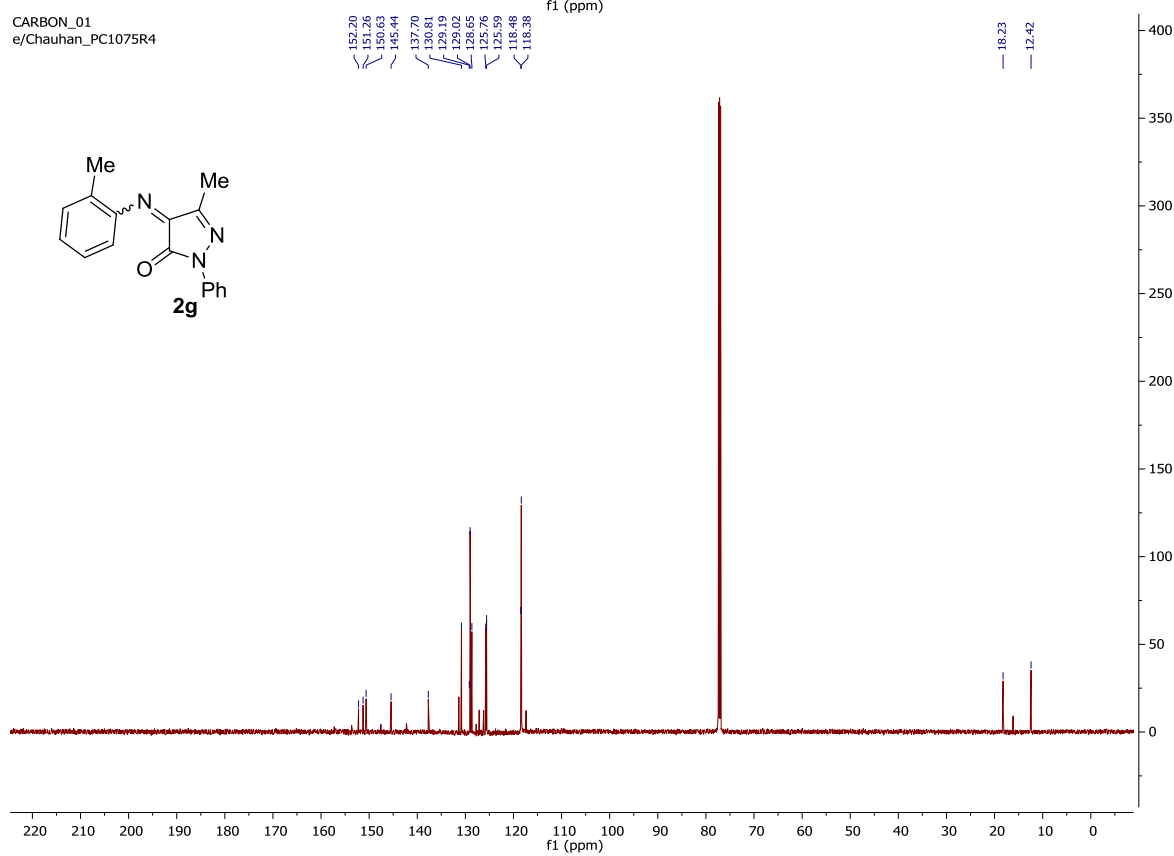

PROTON\_01  
e/mahajan\_sm202

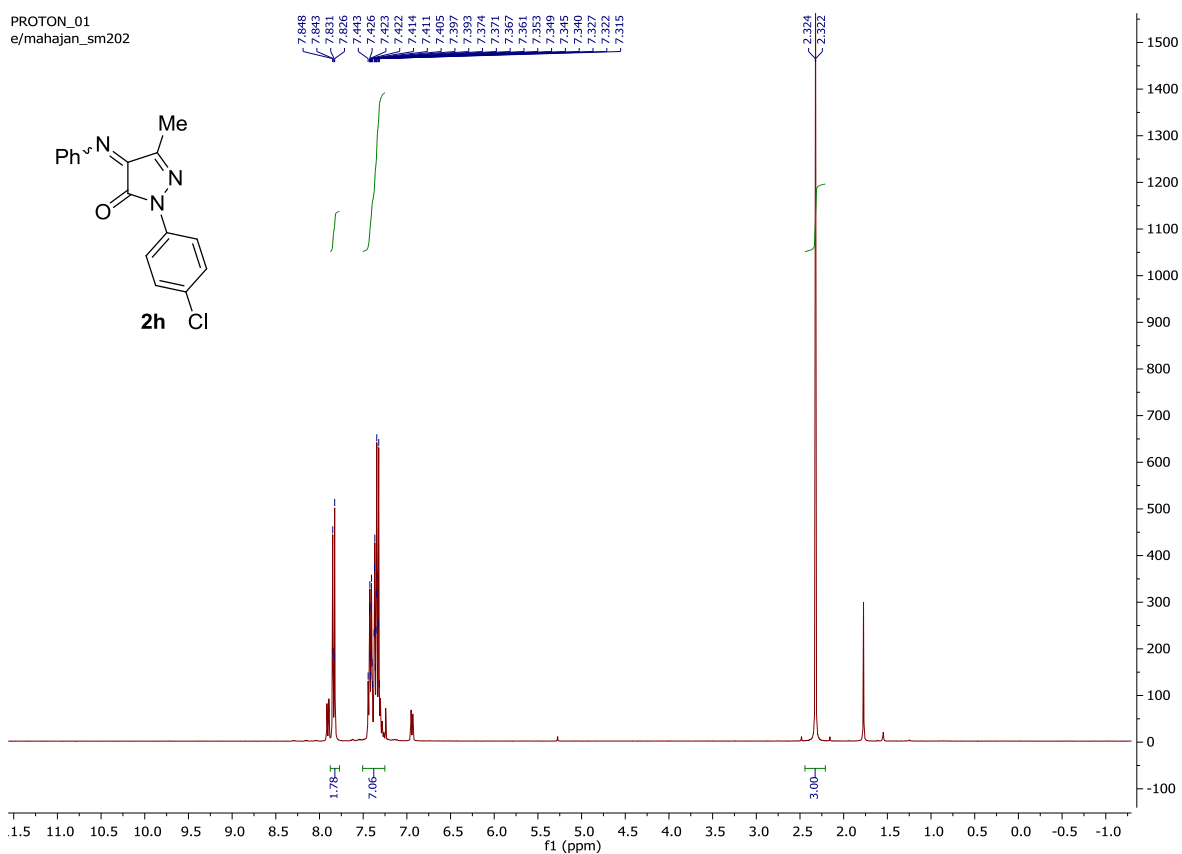

CARBON\_01  
e/mahajan\_sm202

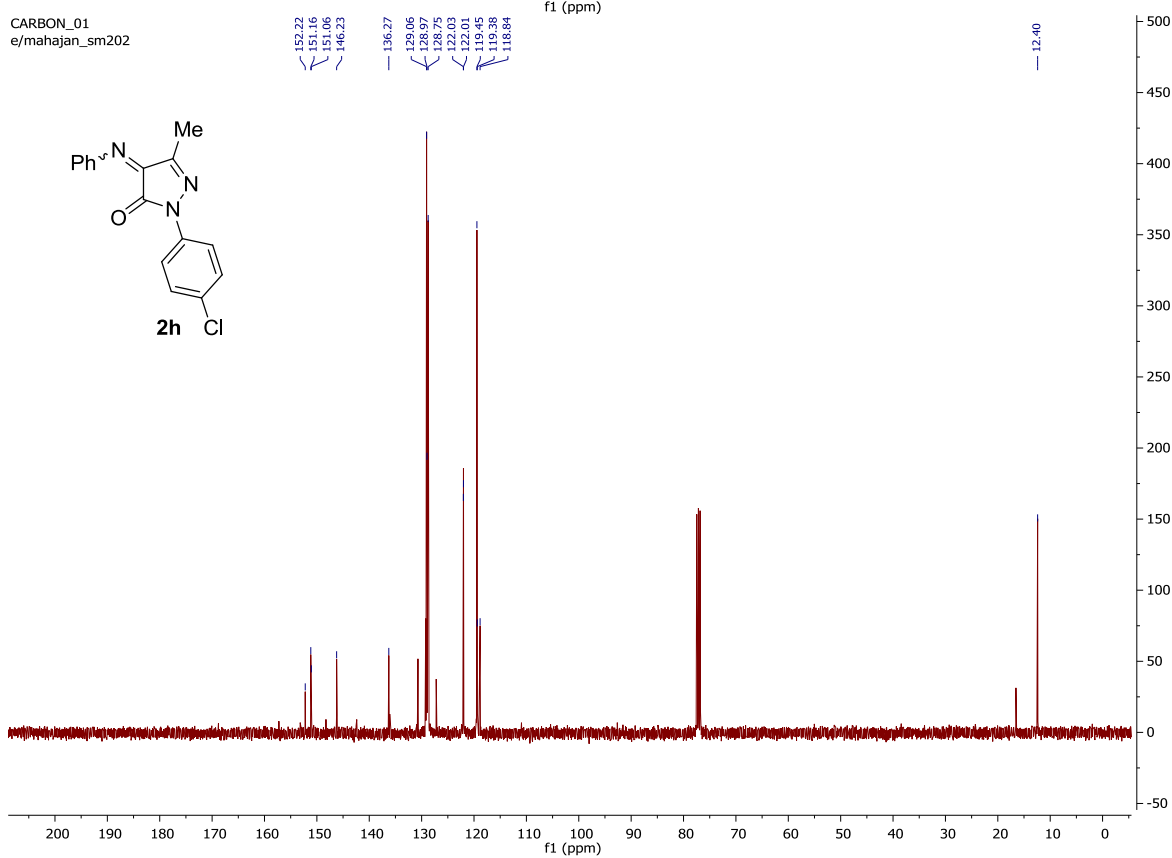



PROTON\_01  
e/Chauhan\_PCKDIM-4

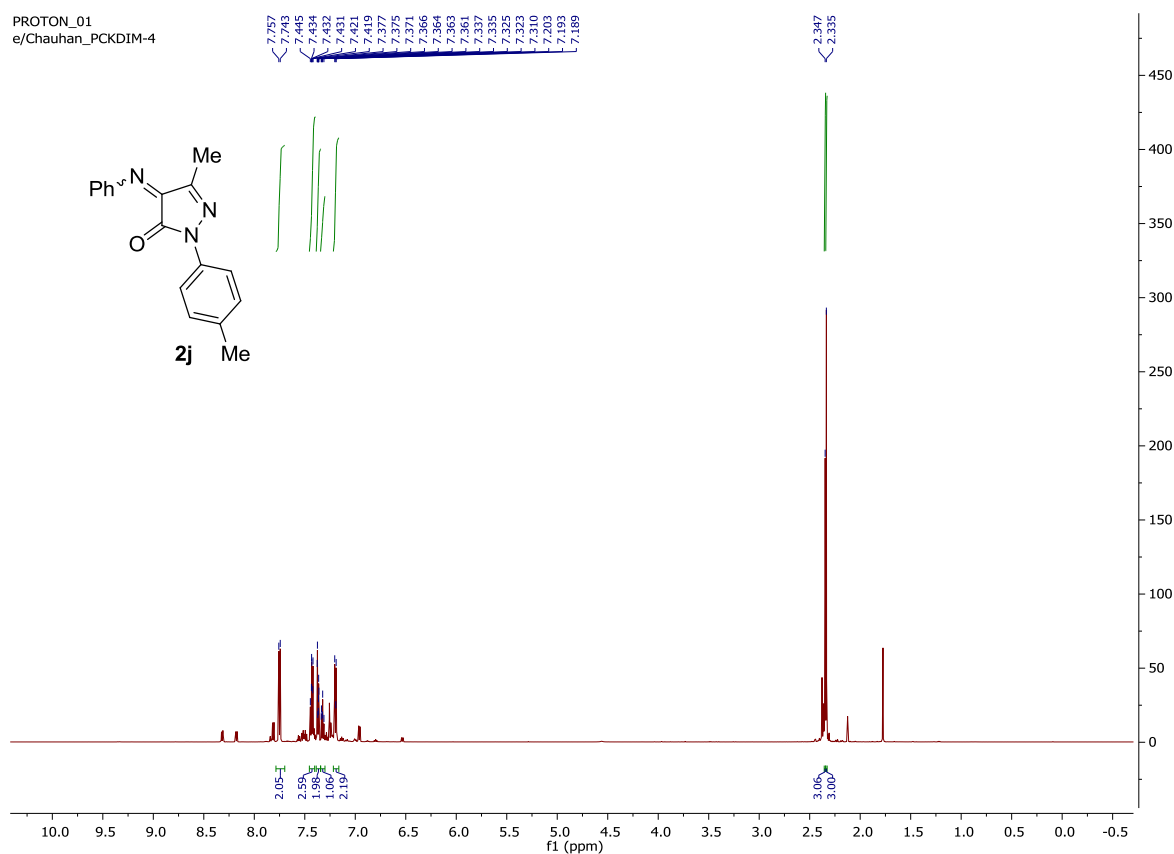

CARBON\_01  
e/Chauhan\_PCKDIM-4

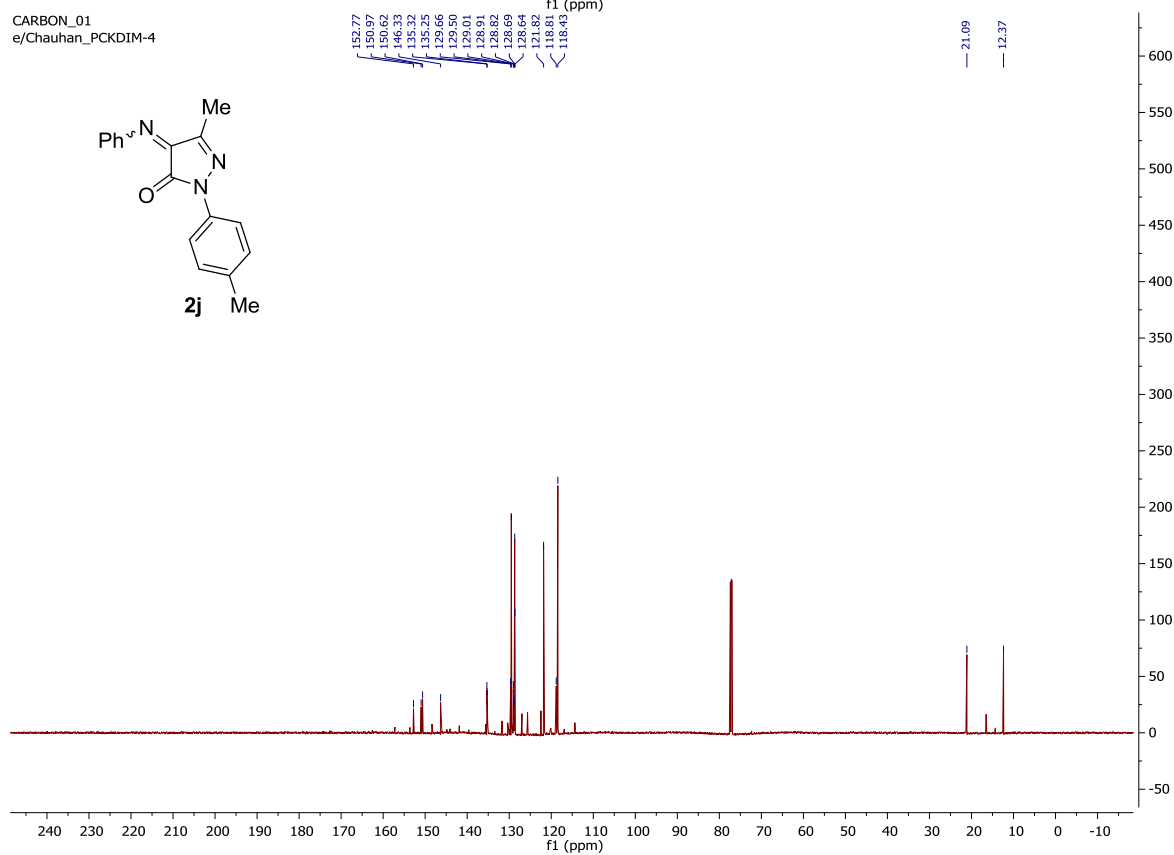



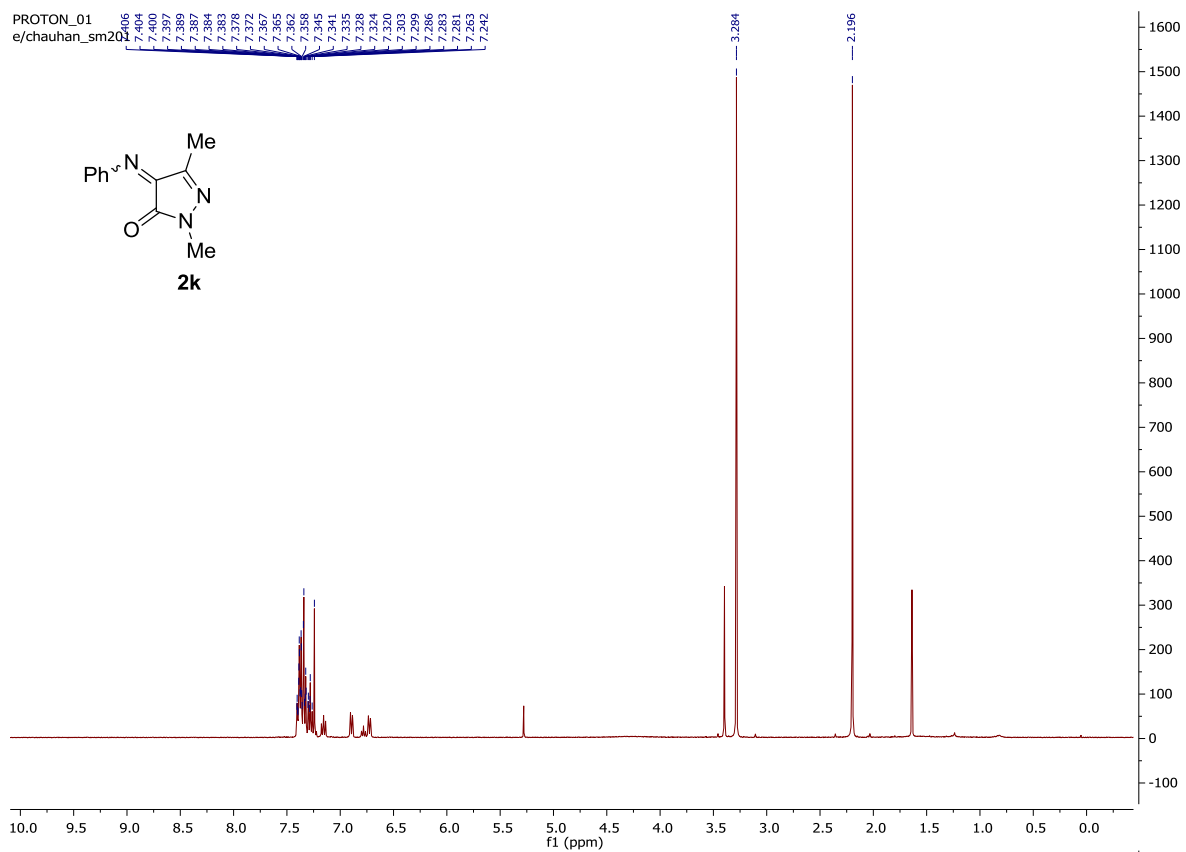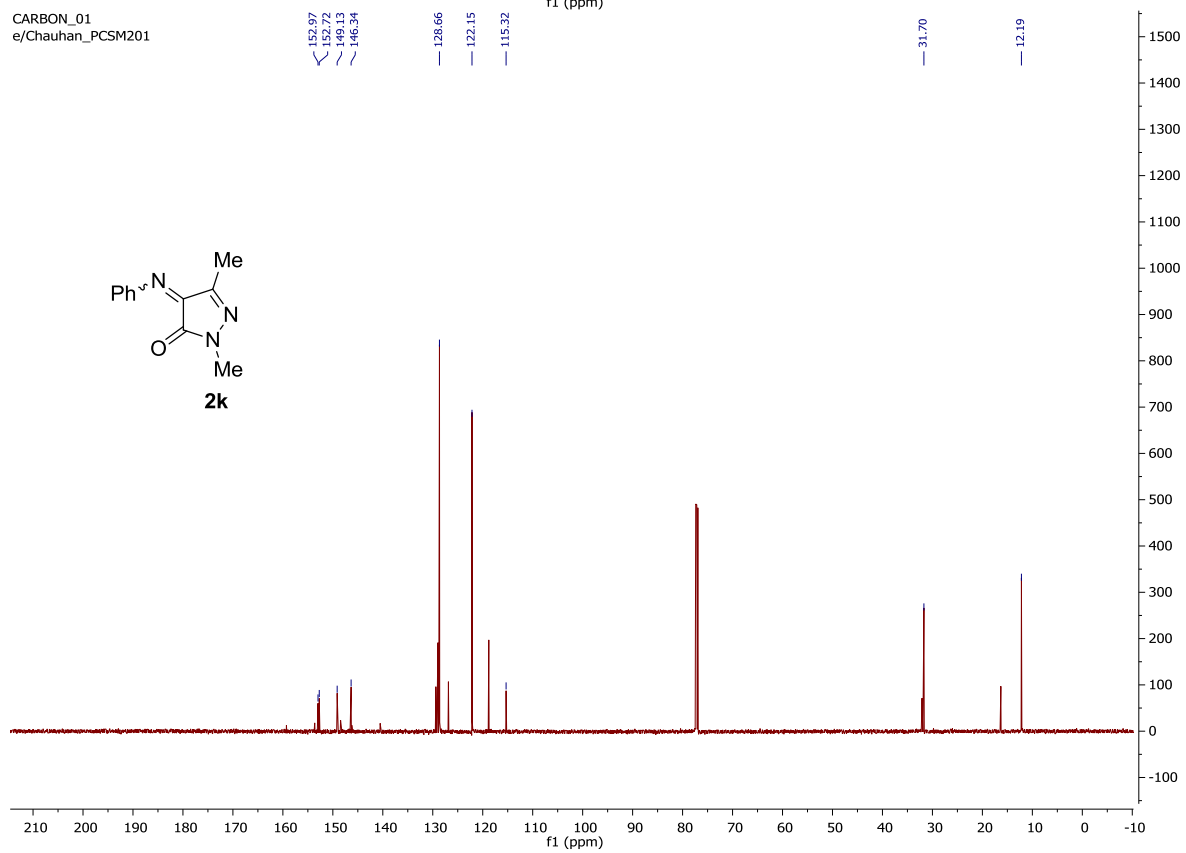

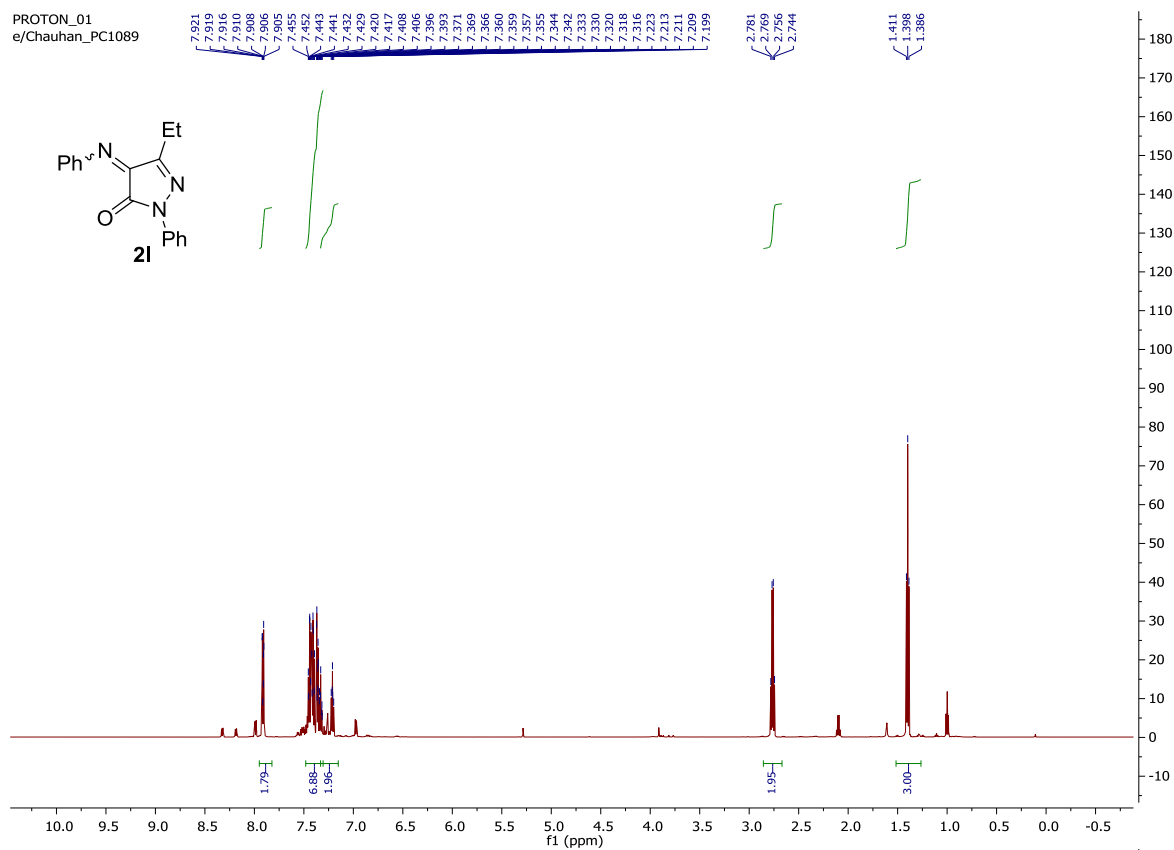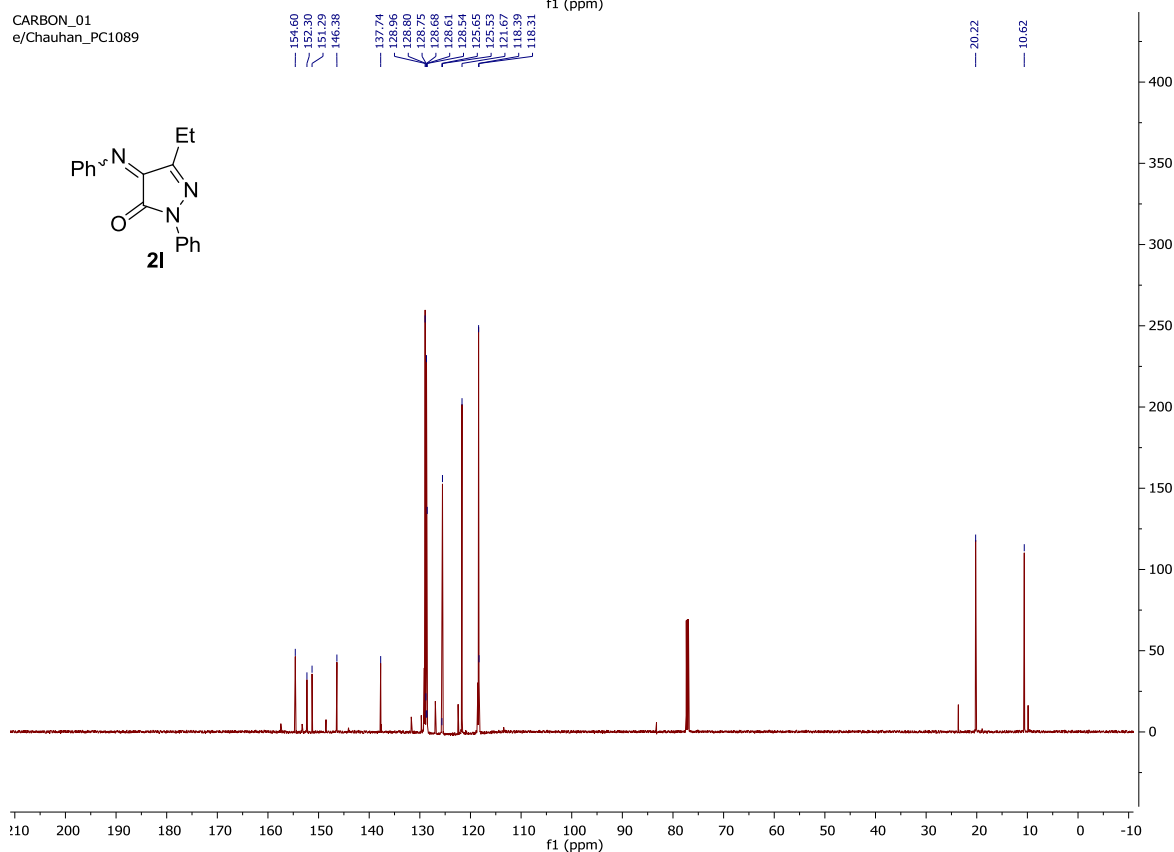

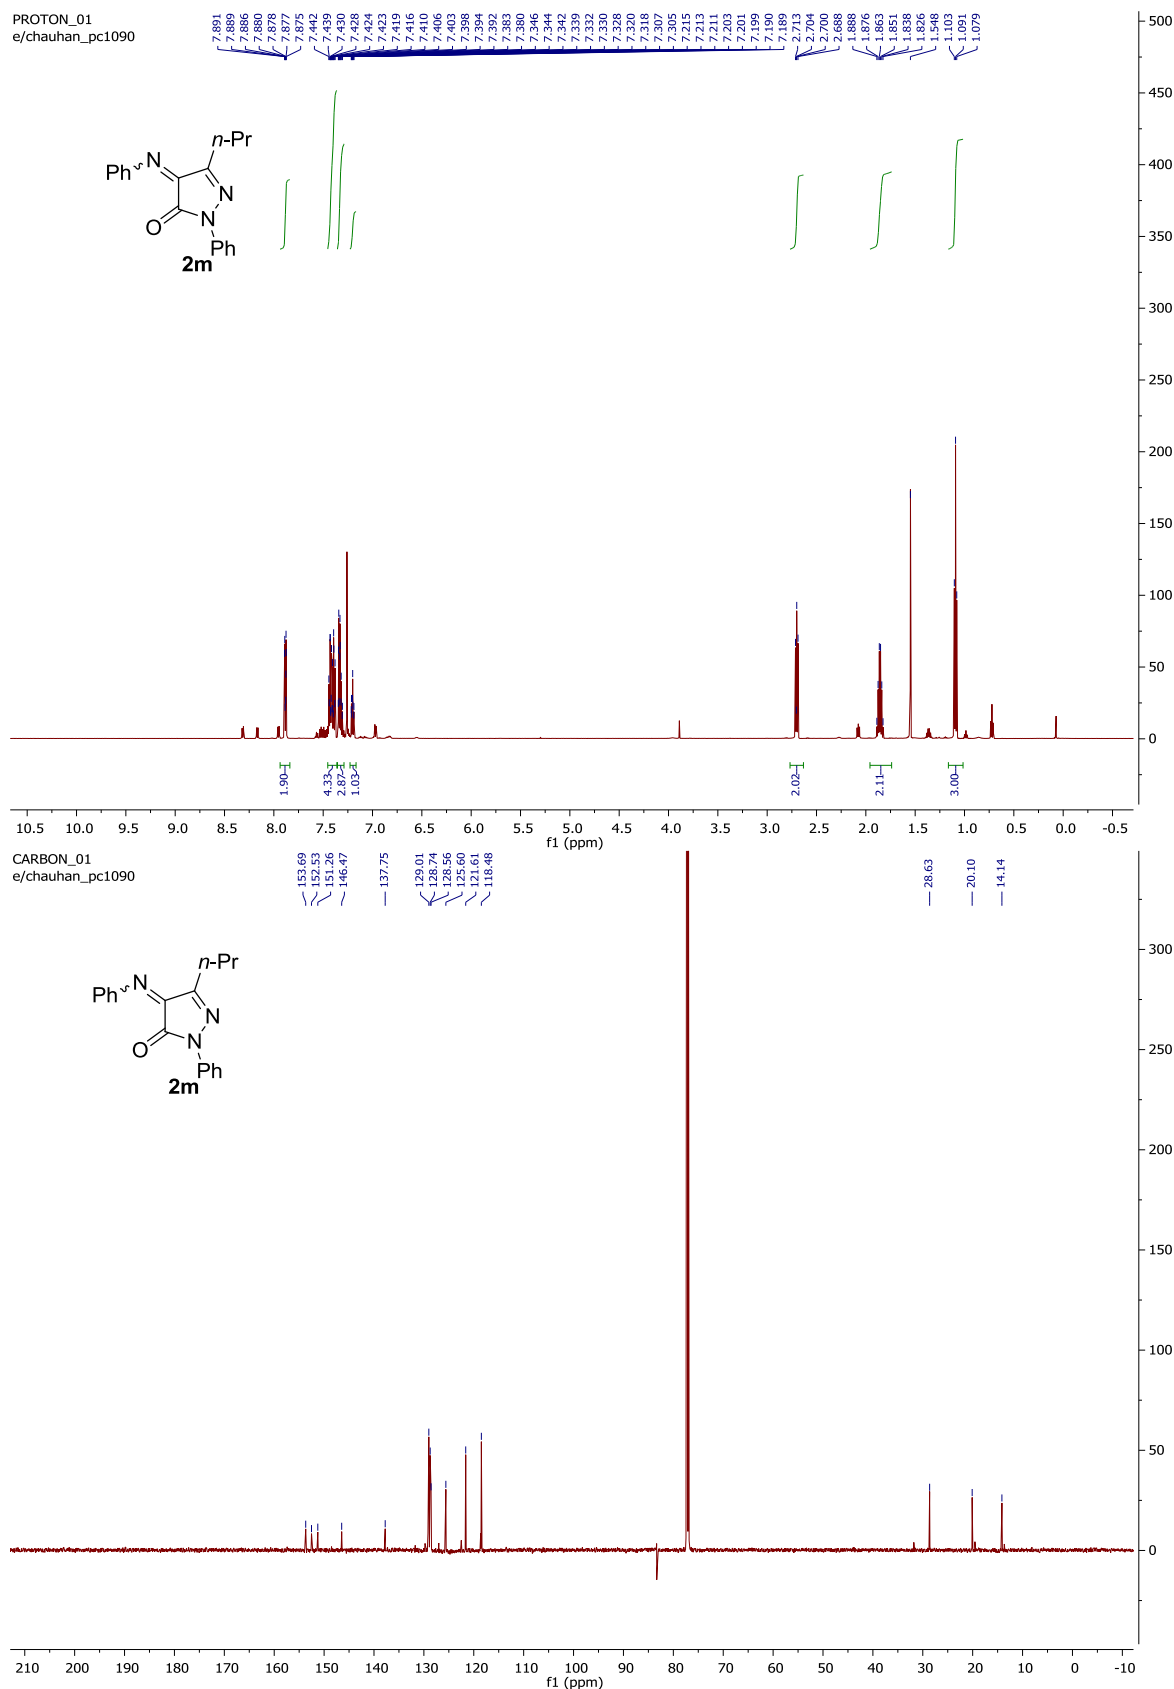

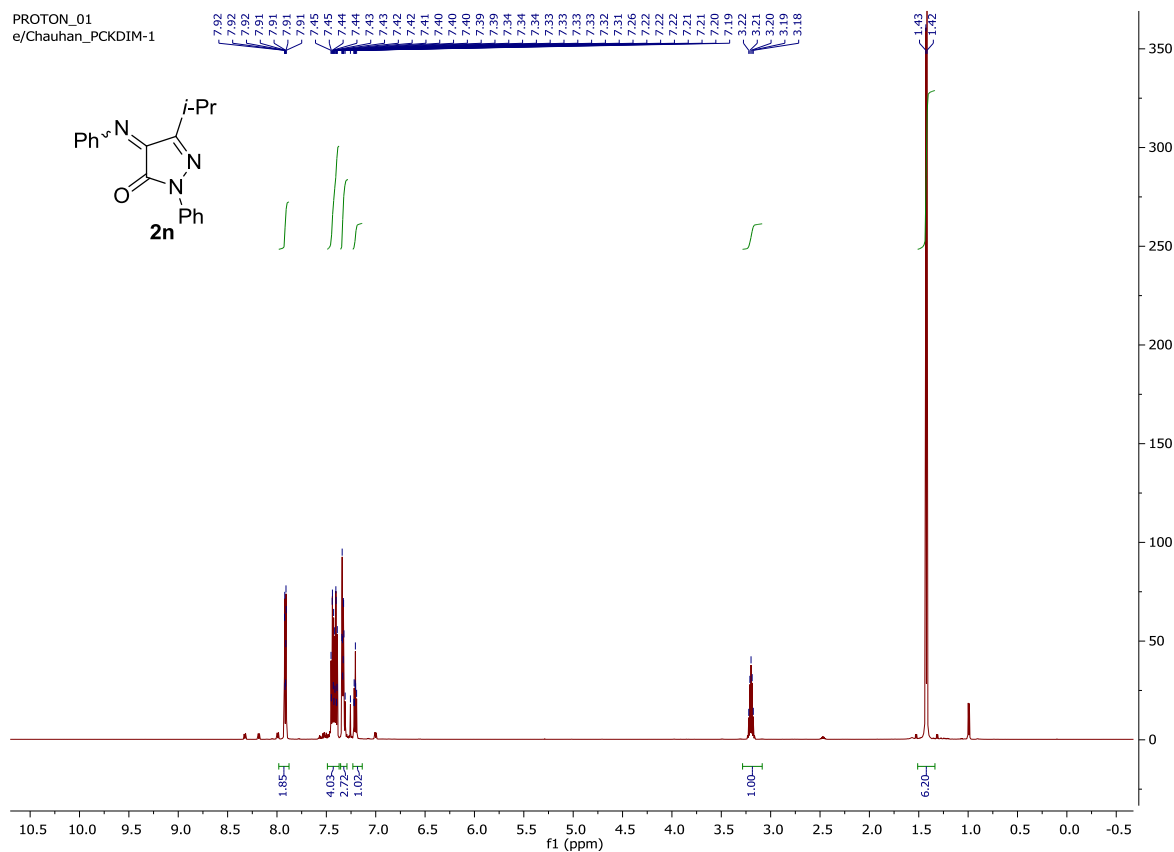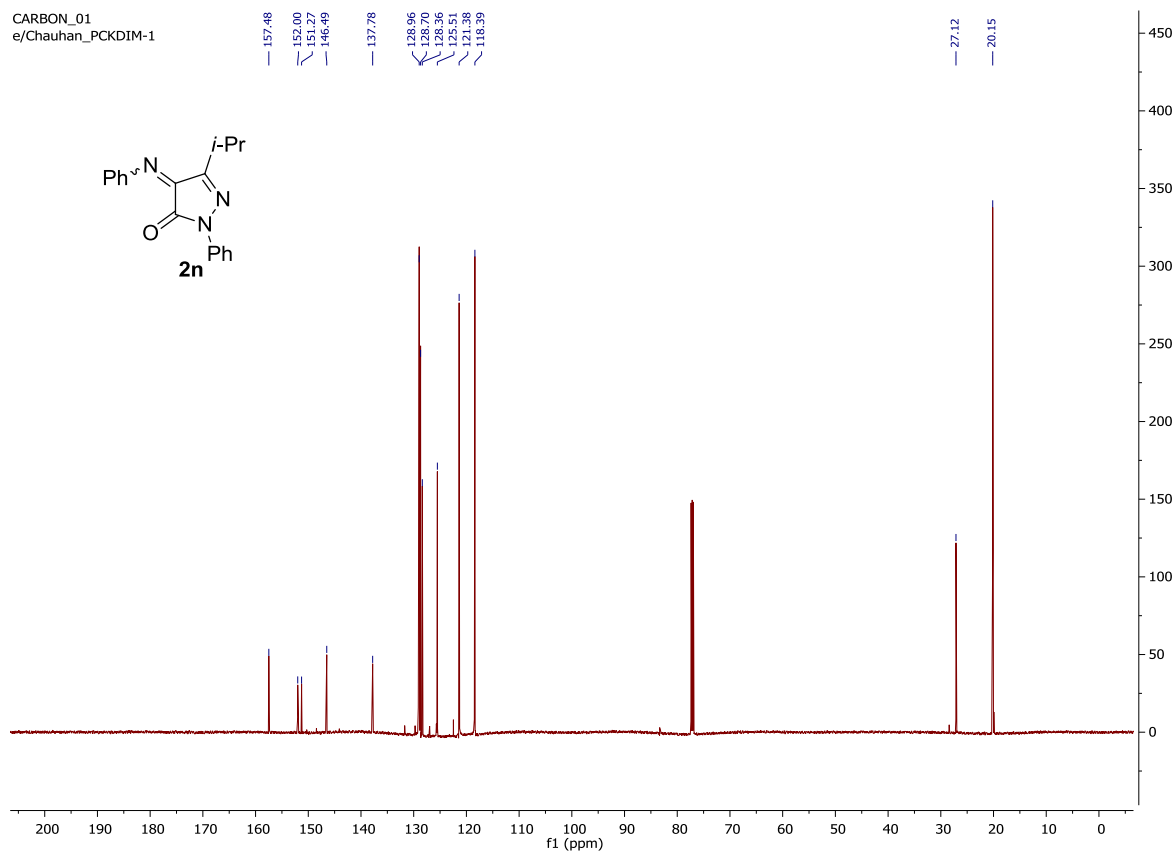

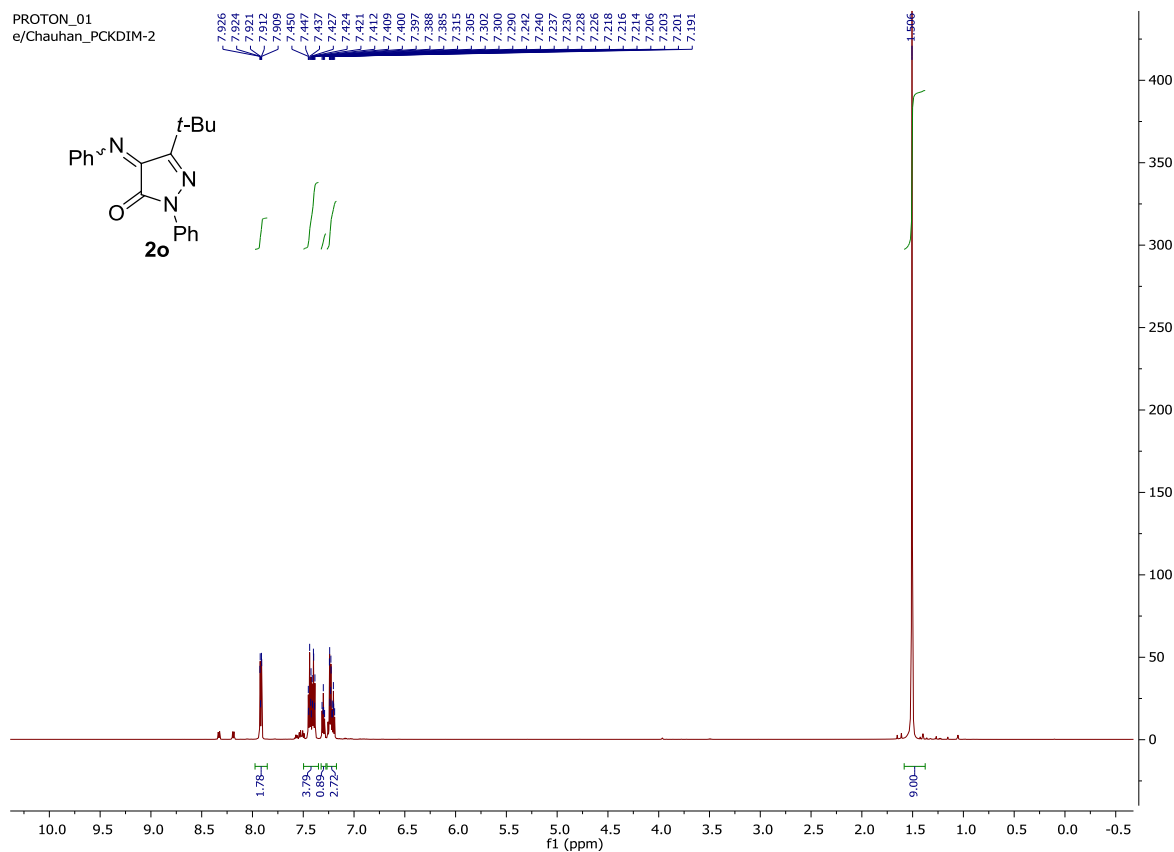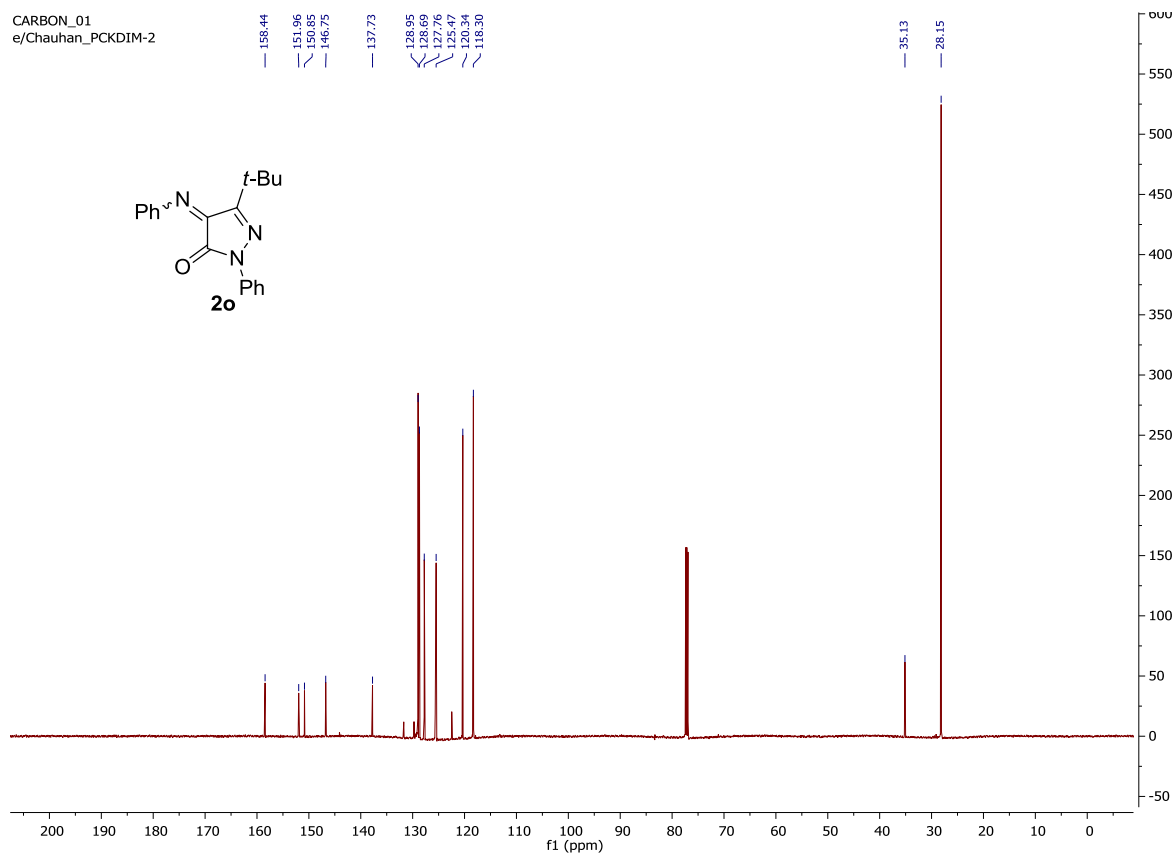

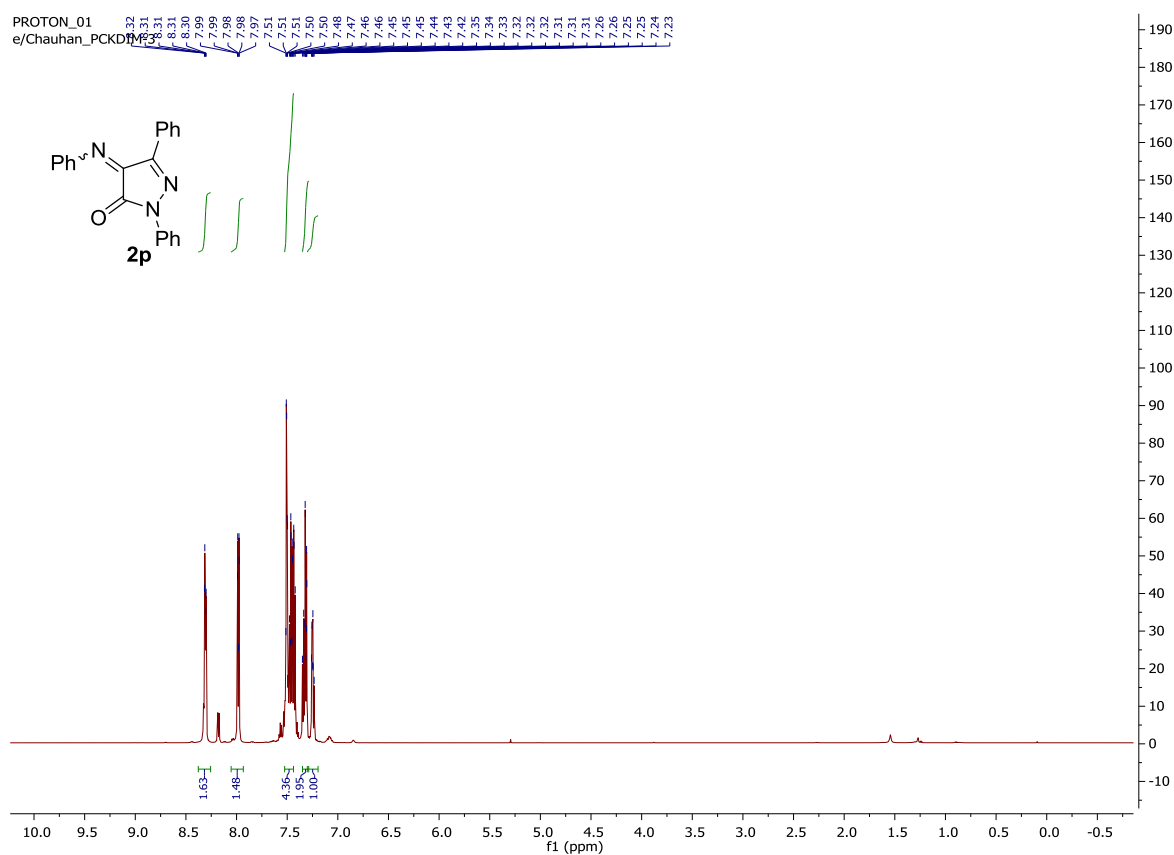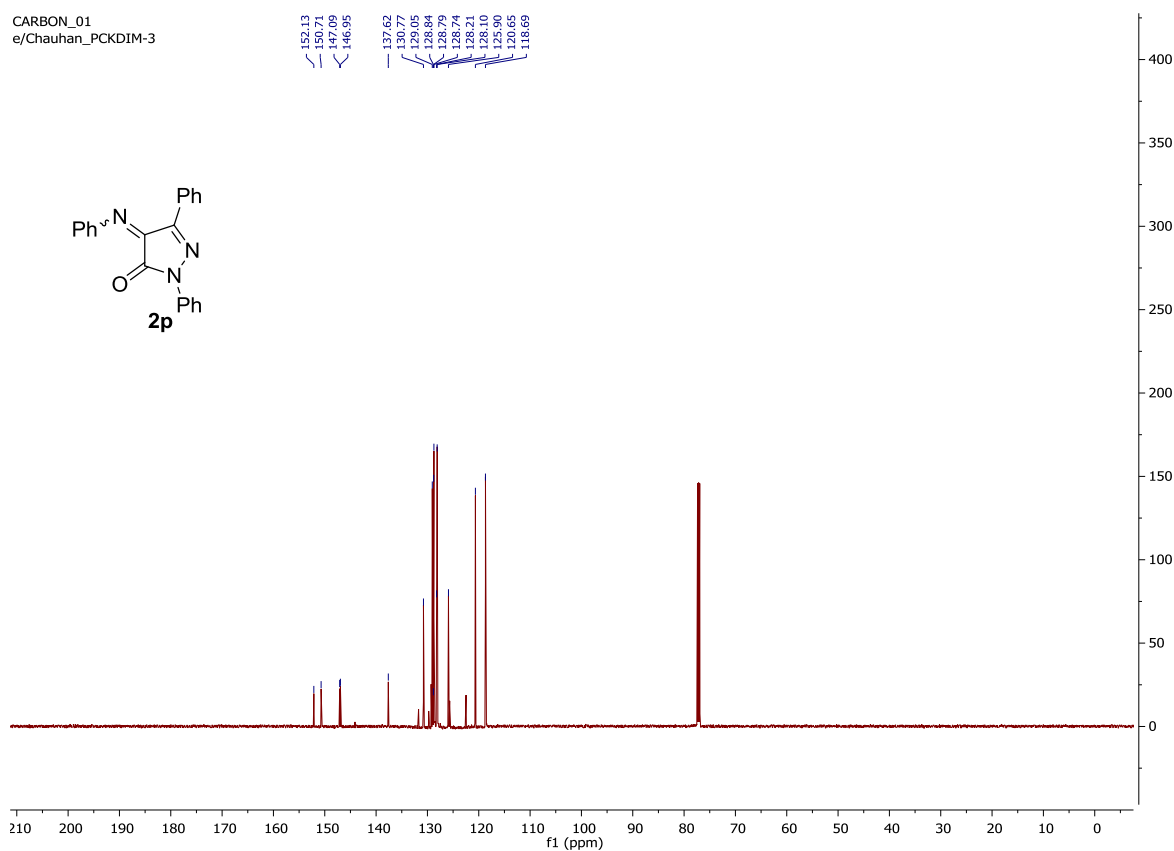

PROTON\_01  
e/Chauhan\_PC1028rep

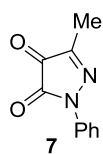

7.846  
7.842  
7.837  
7.834  
7.831  
7.437  
7.419  
7.415  
7.400  
7.397  
7.298  
7.295  
7.239  
7.223  
7.220

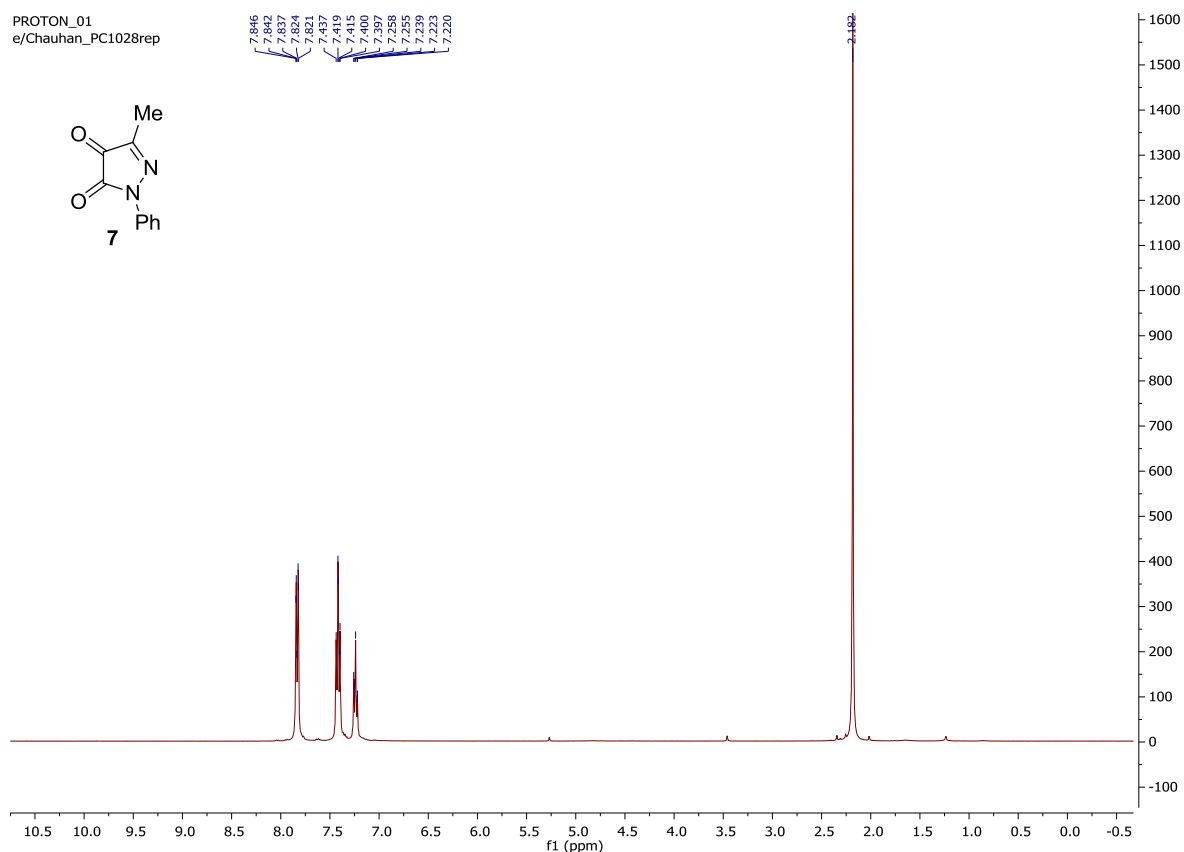

CARBON\_01  
e/Chauhan\_PC1028rep

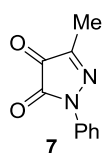

184.65  
149.19  
144.55  
136.96  
129.27  
126.35  
117.78  
11.15

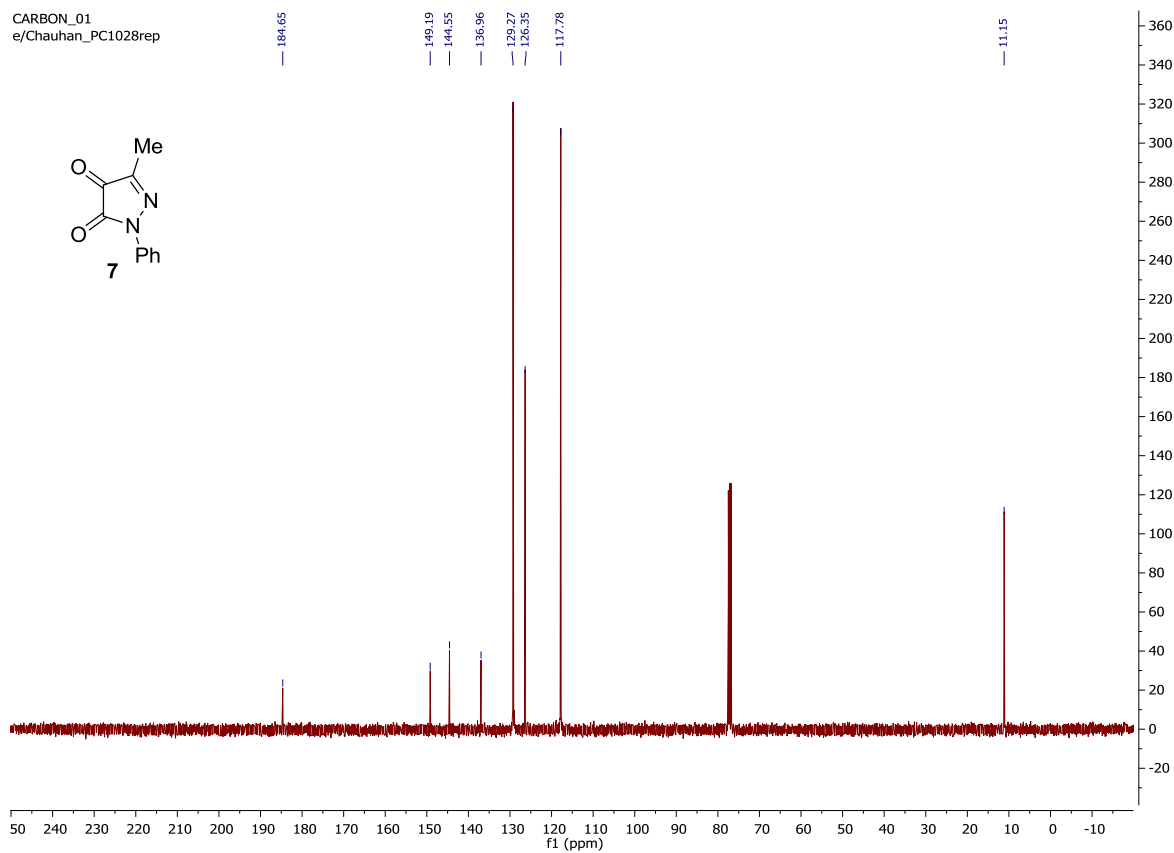

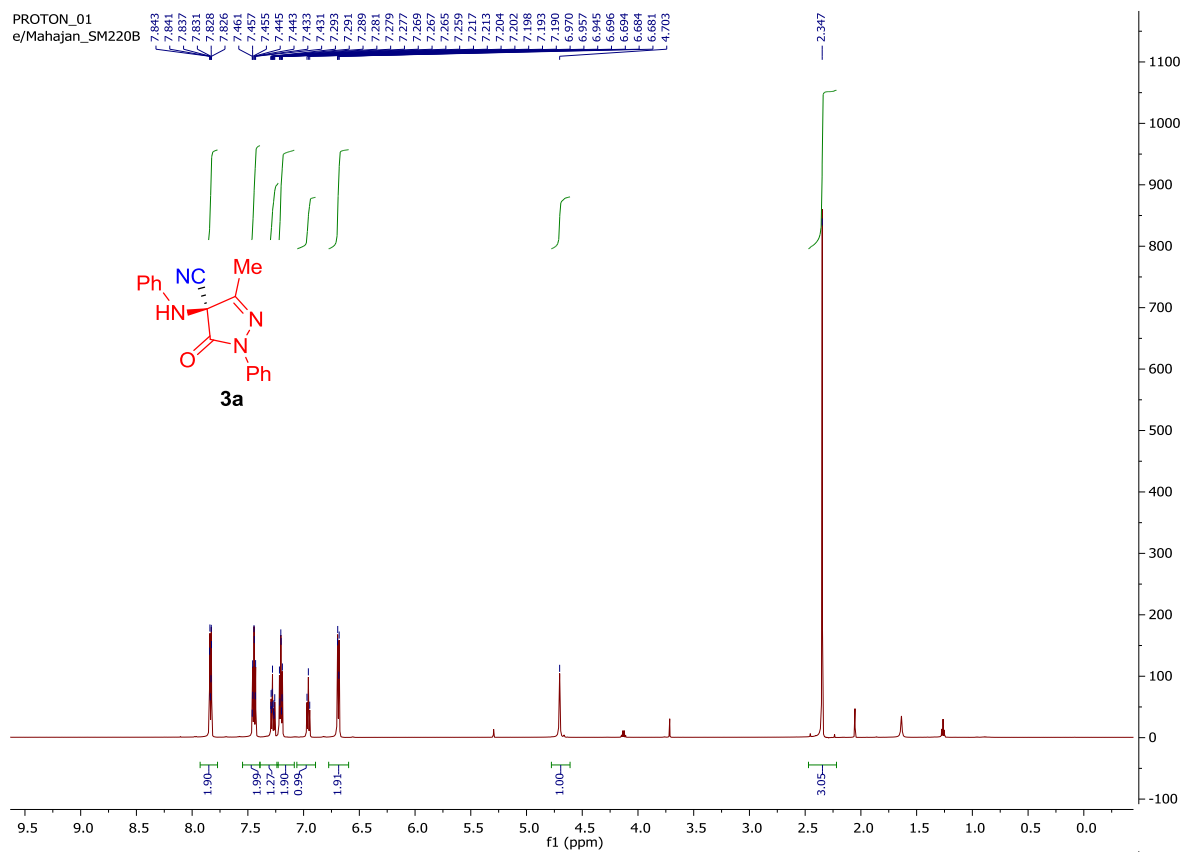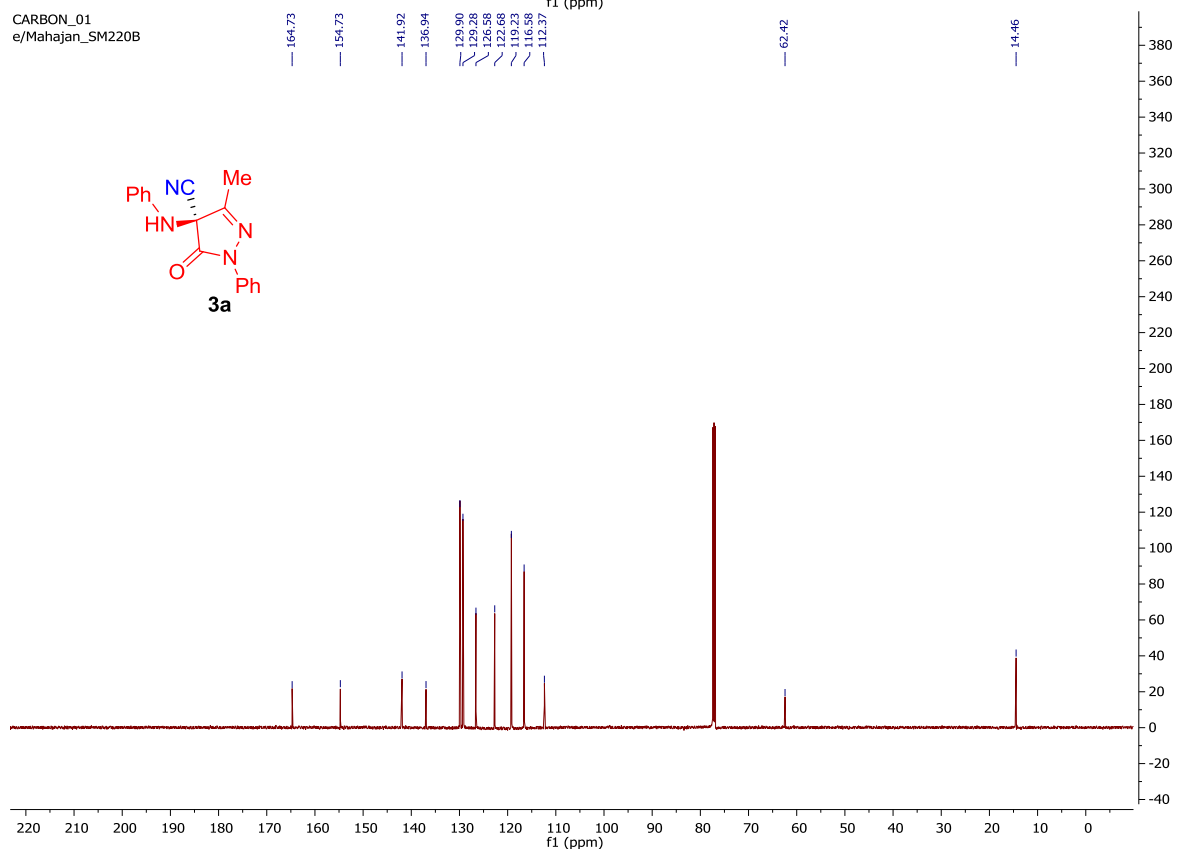



PROTON\_01  
e/Mahajan\_SM195

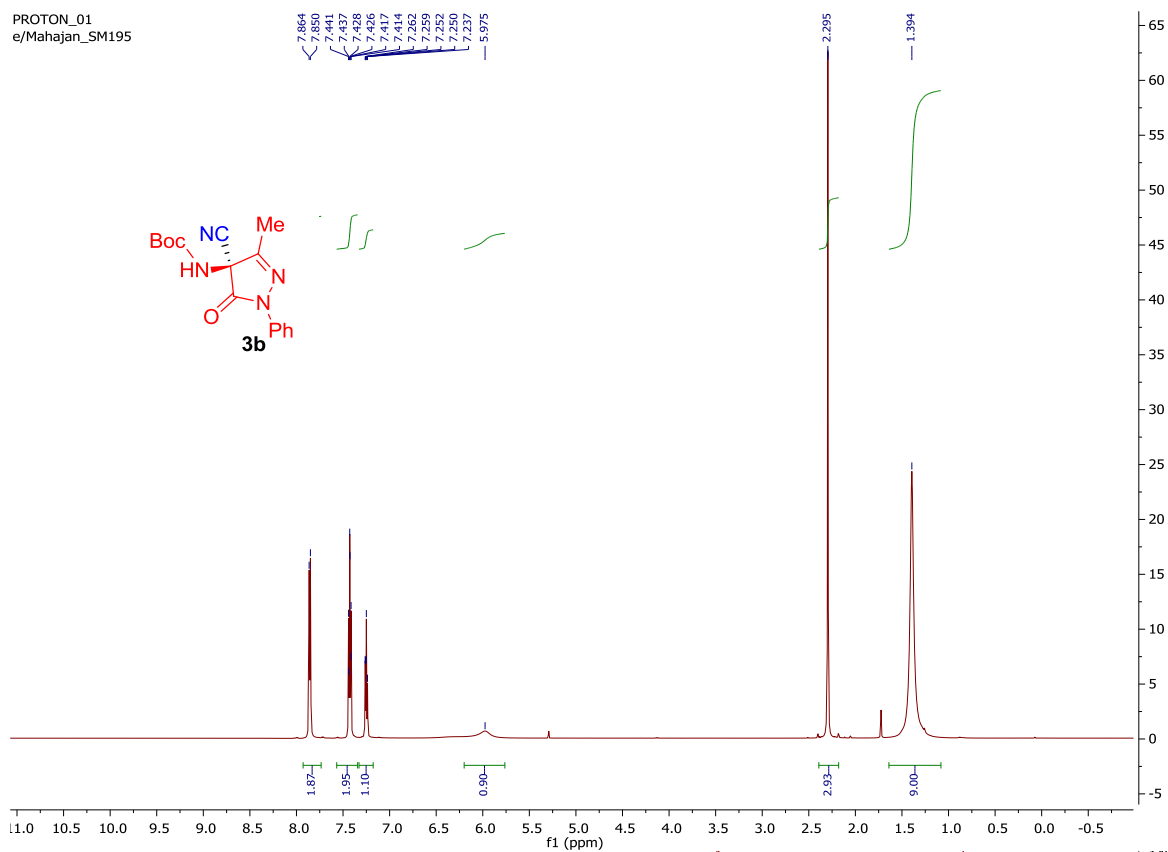

CARBON\_01  
e/Mahajan\_SM195

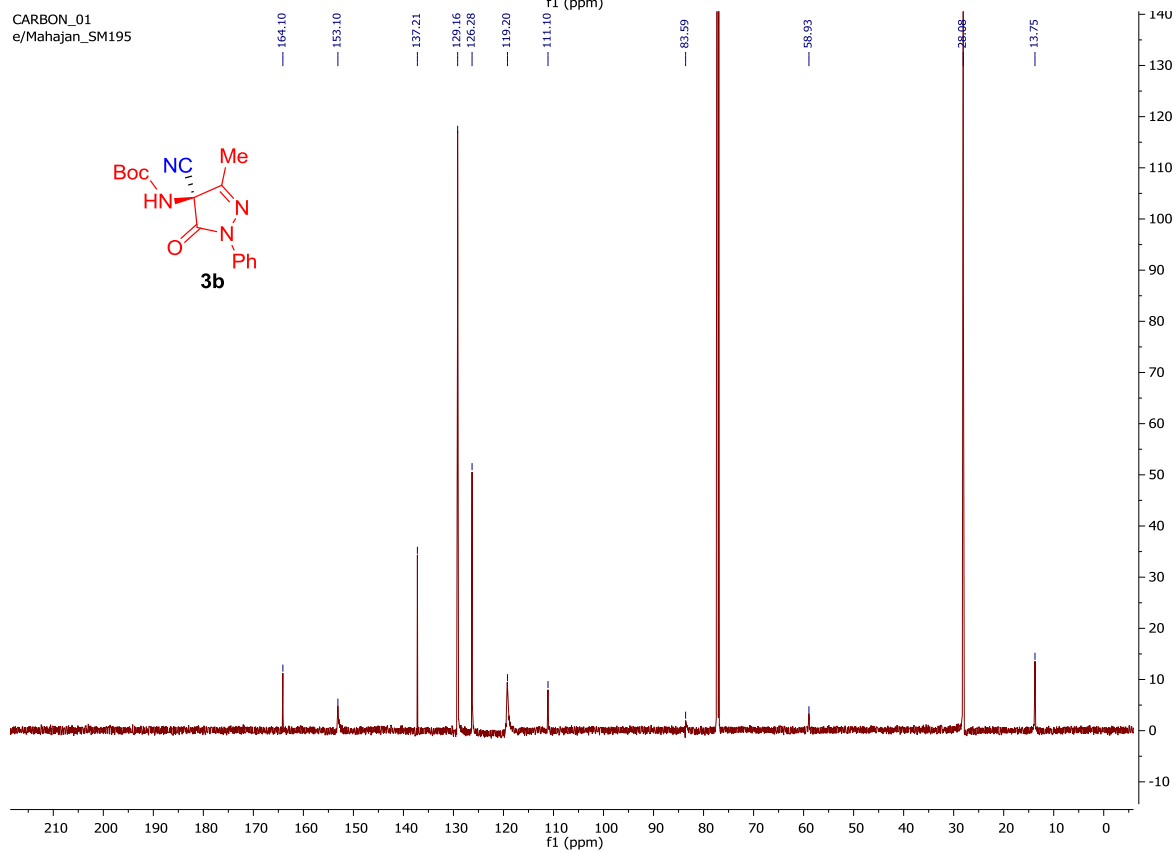

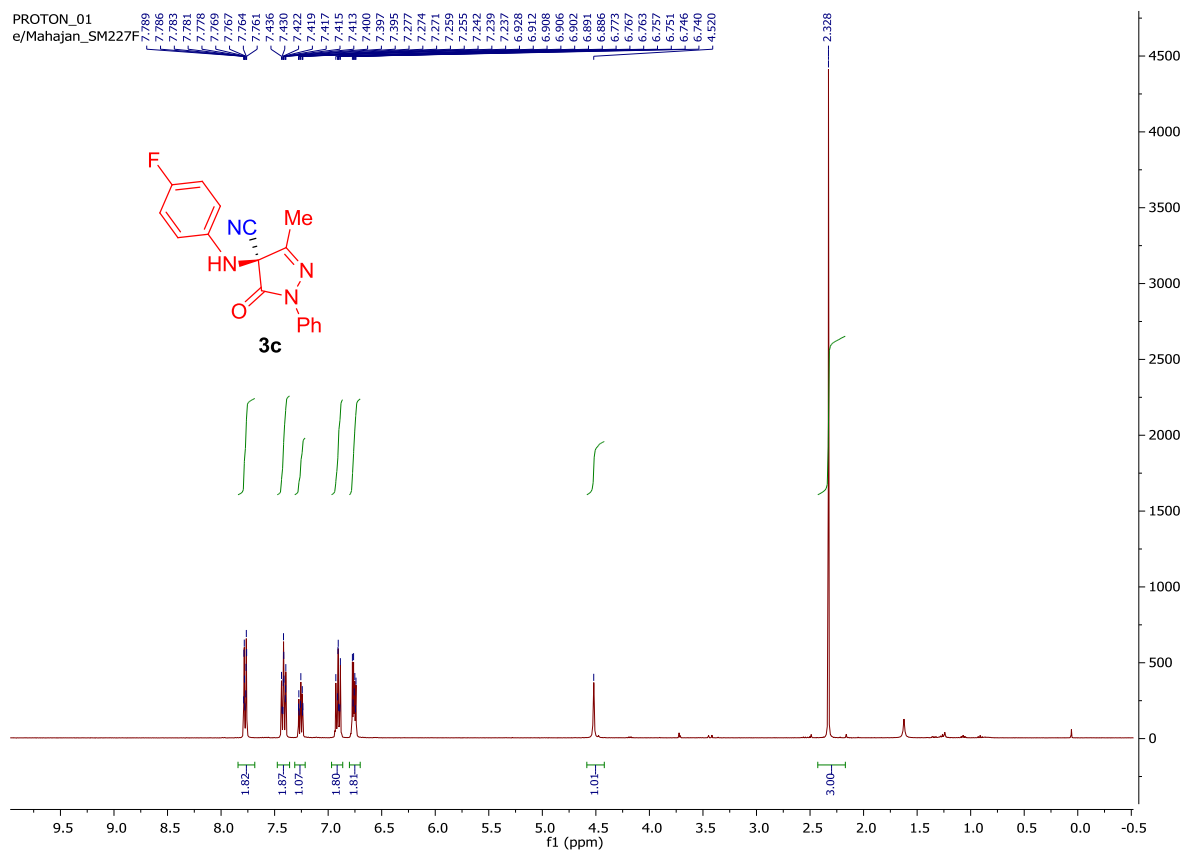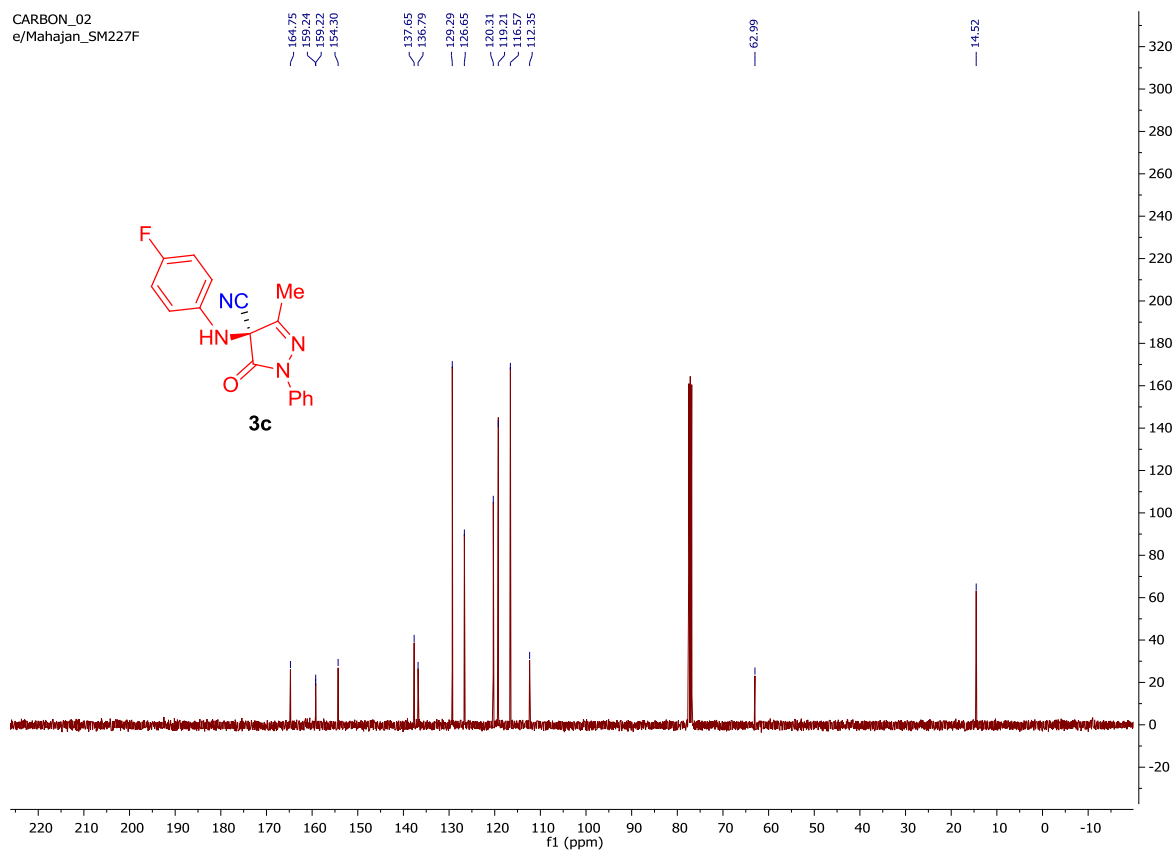

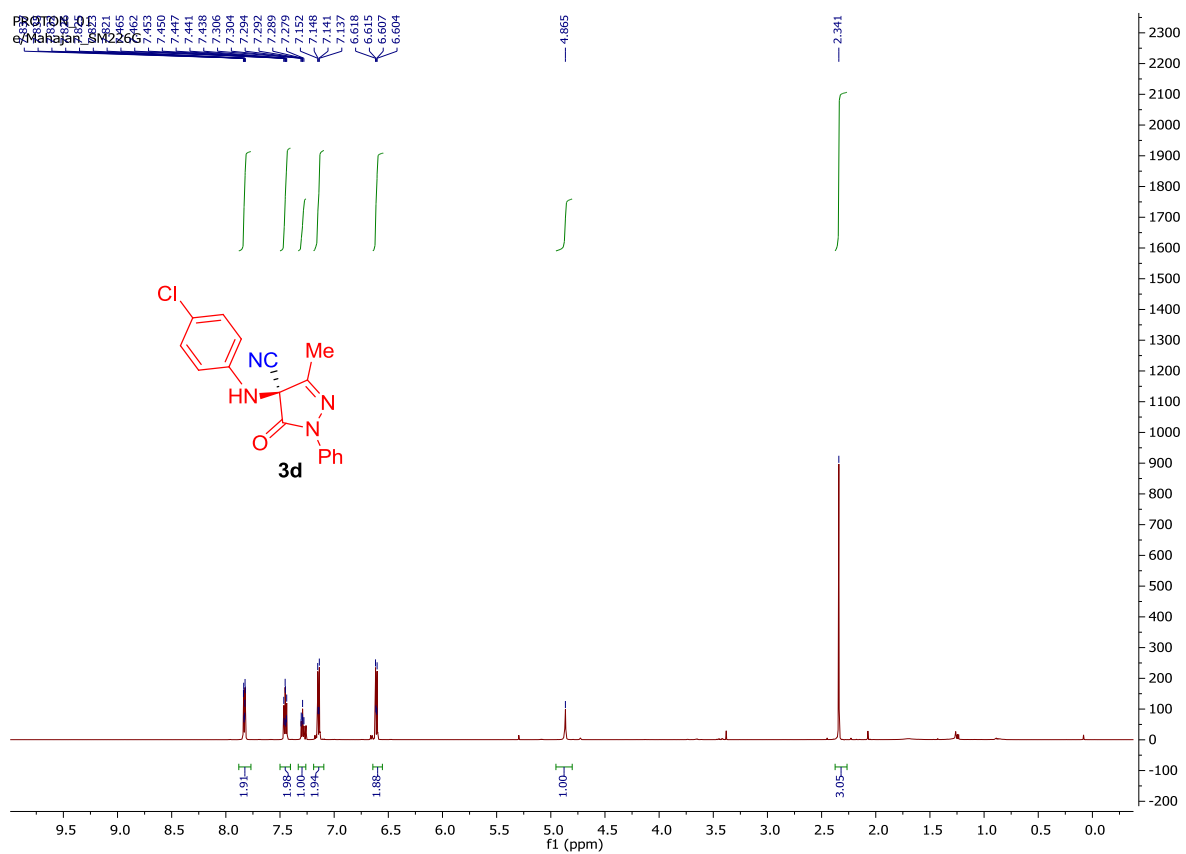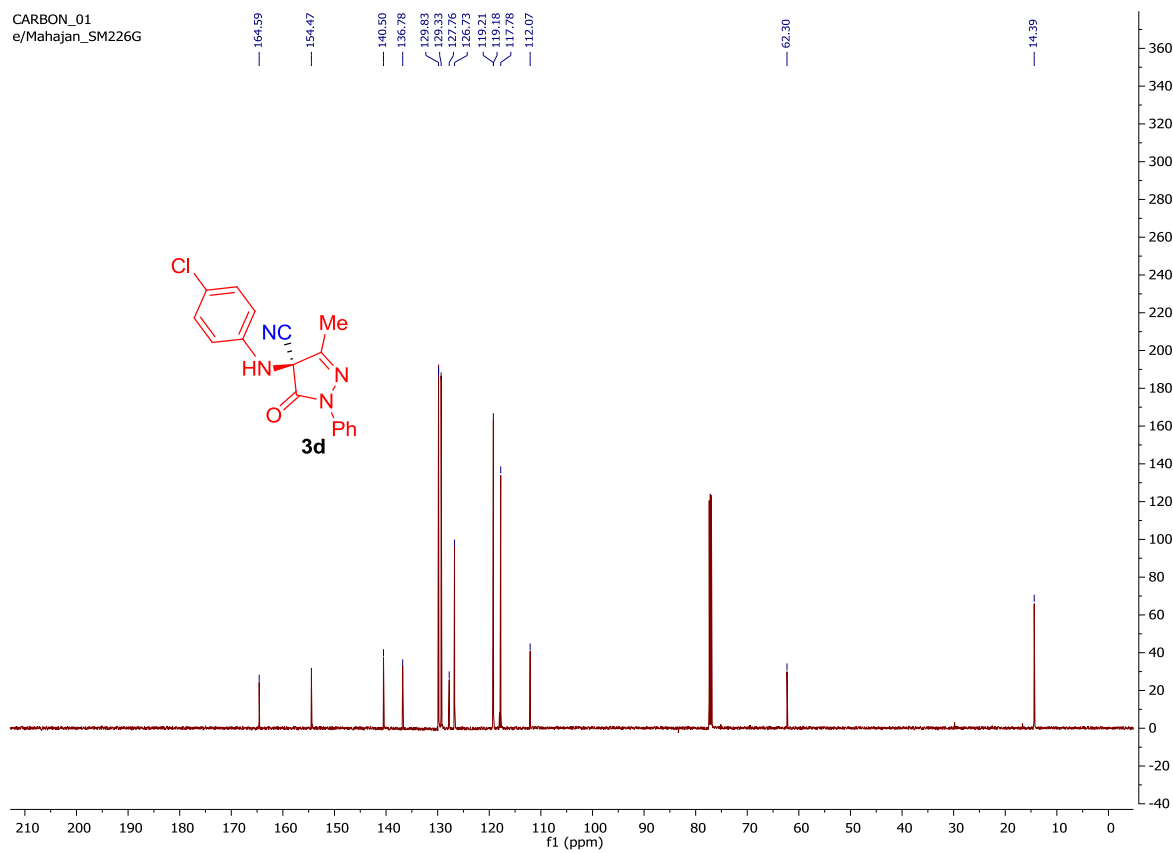

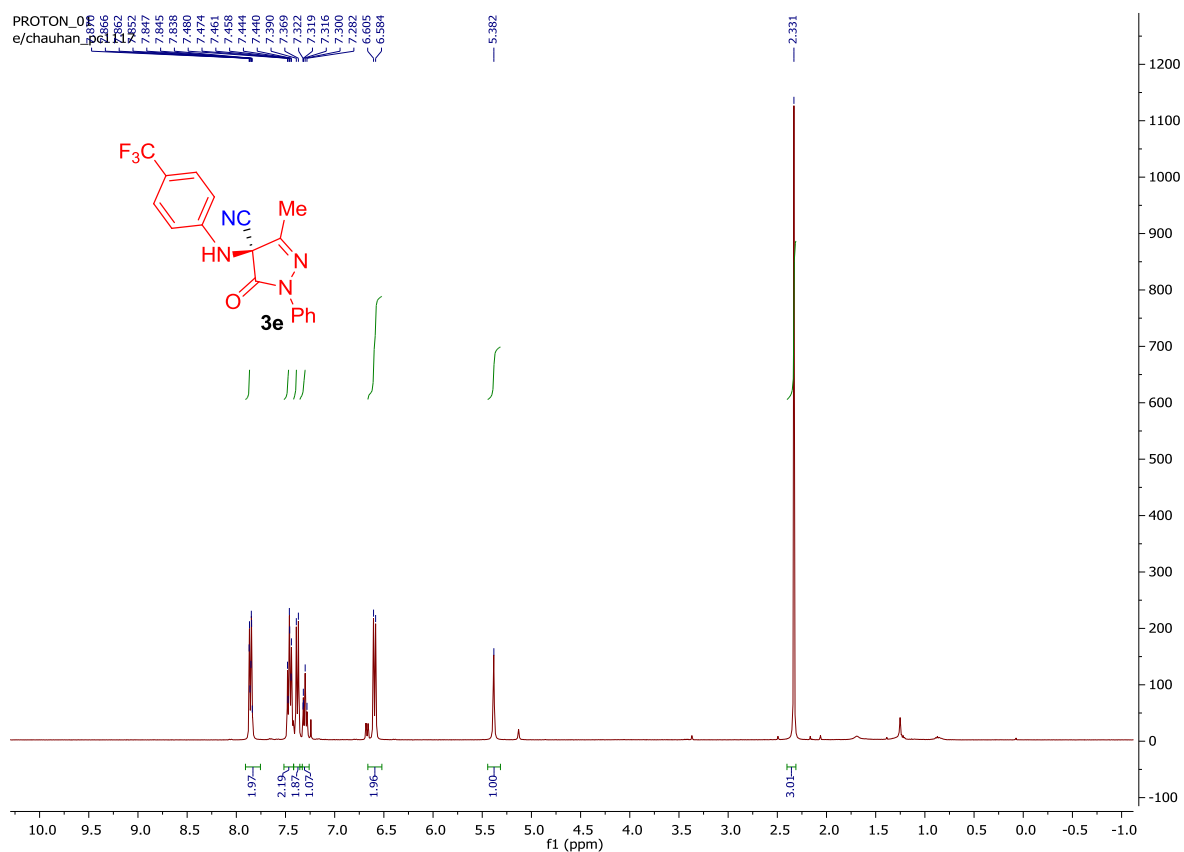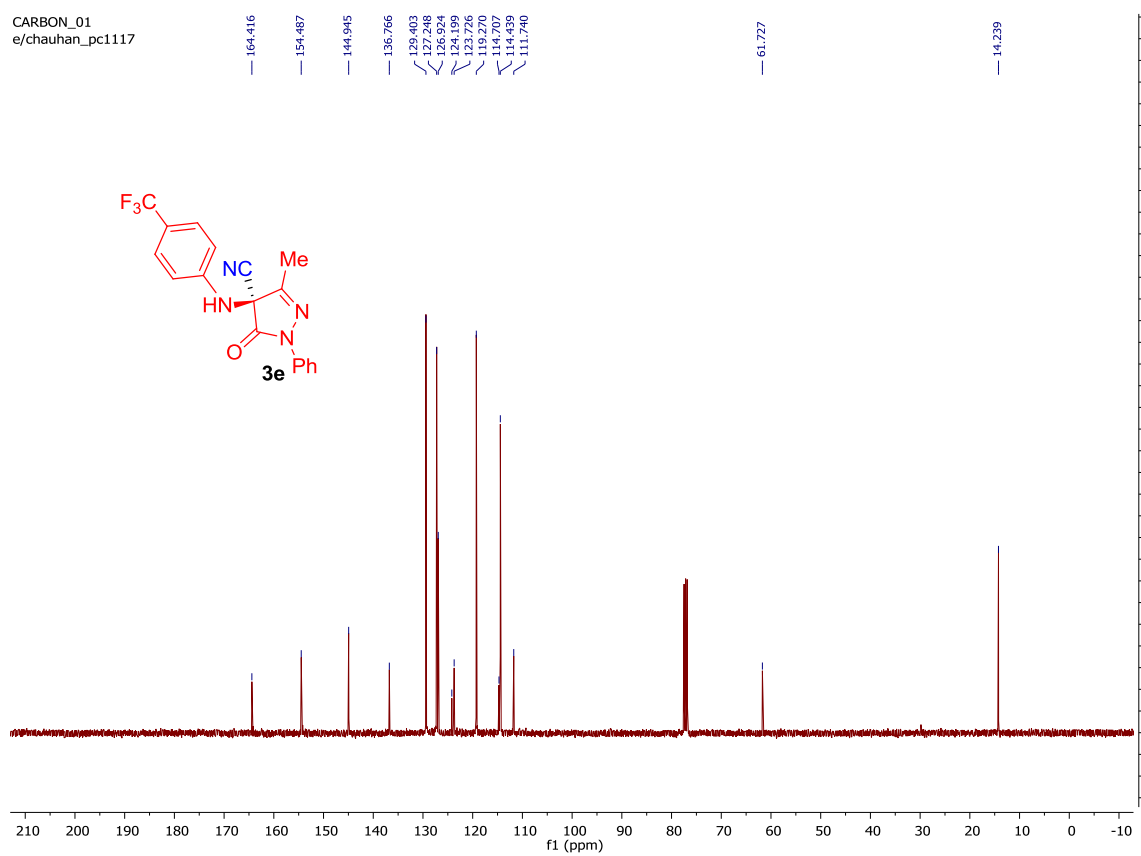

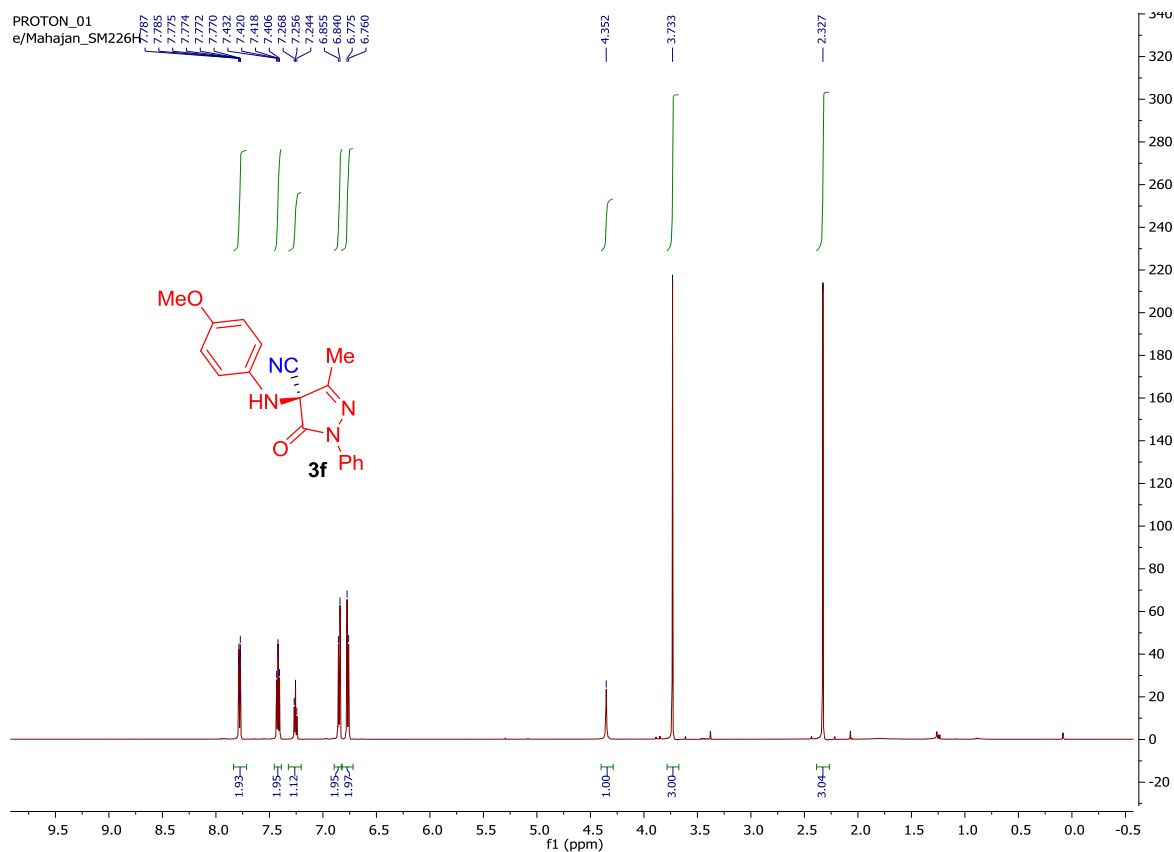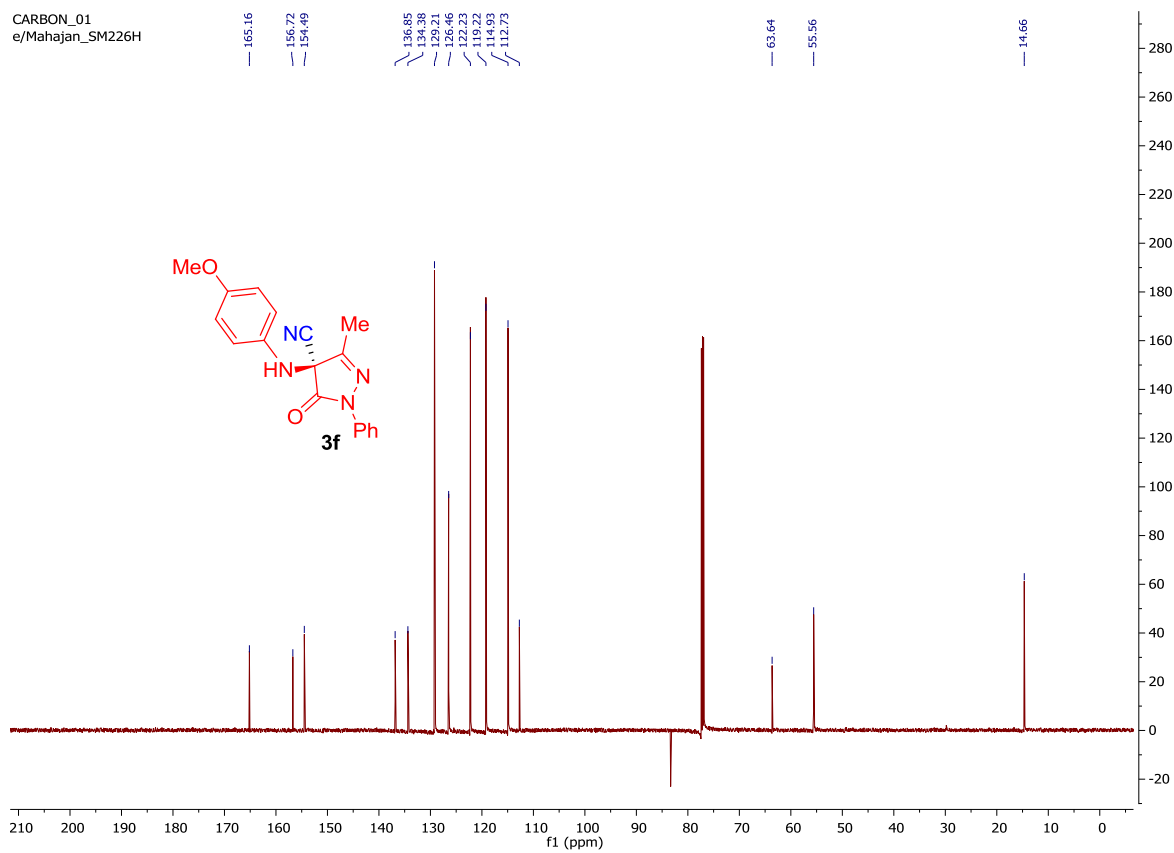

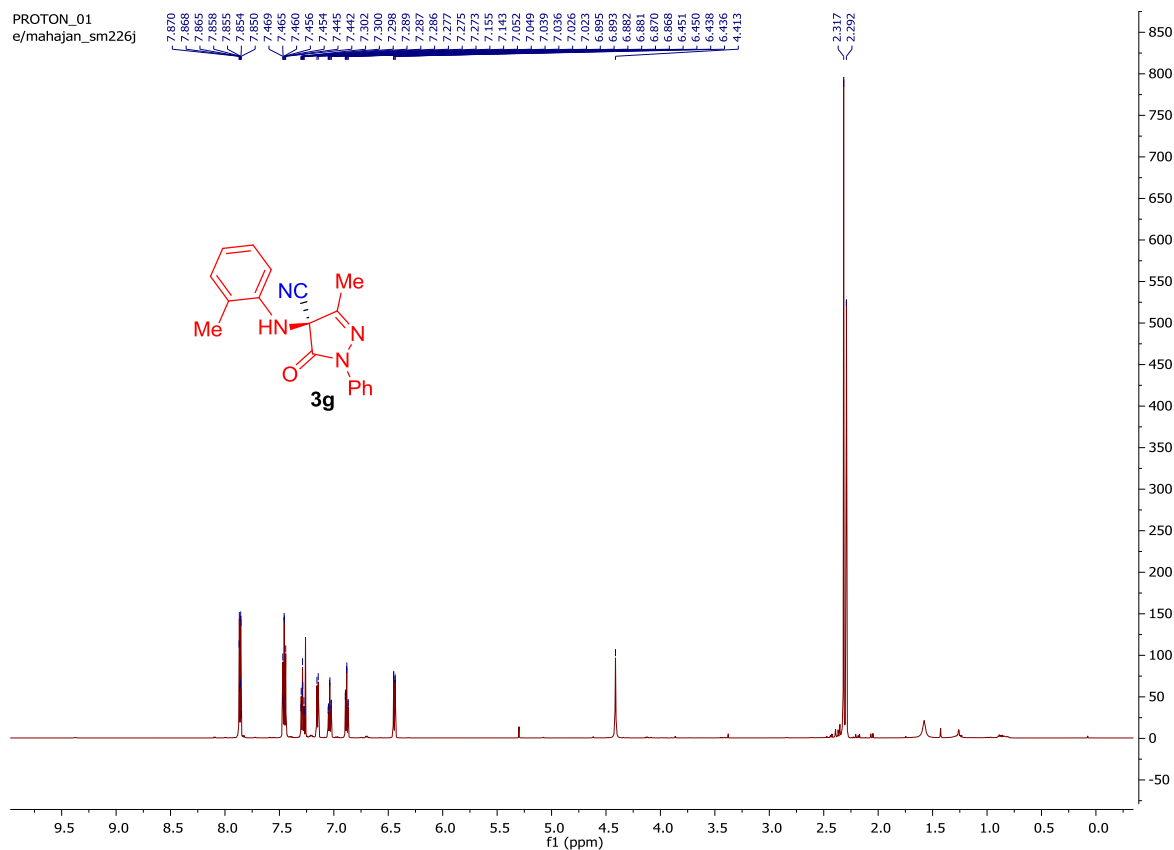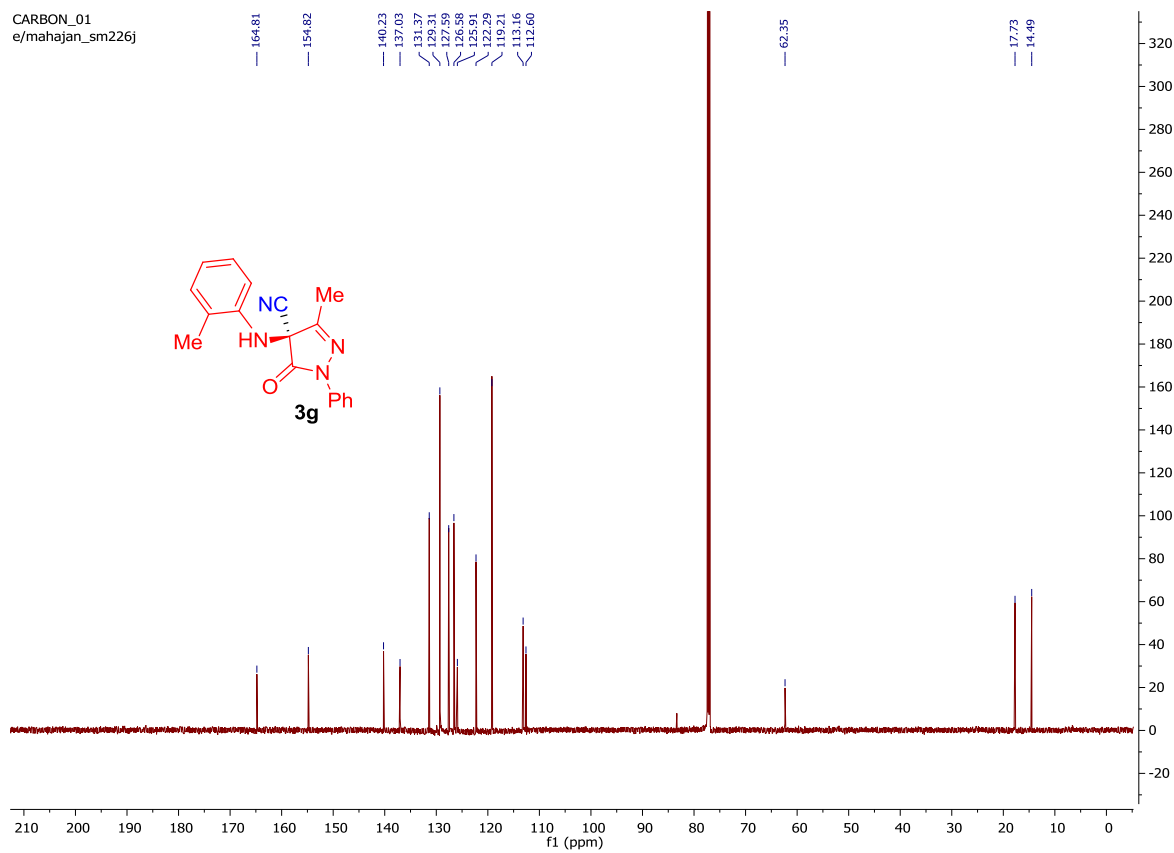

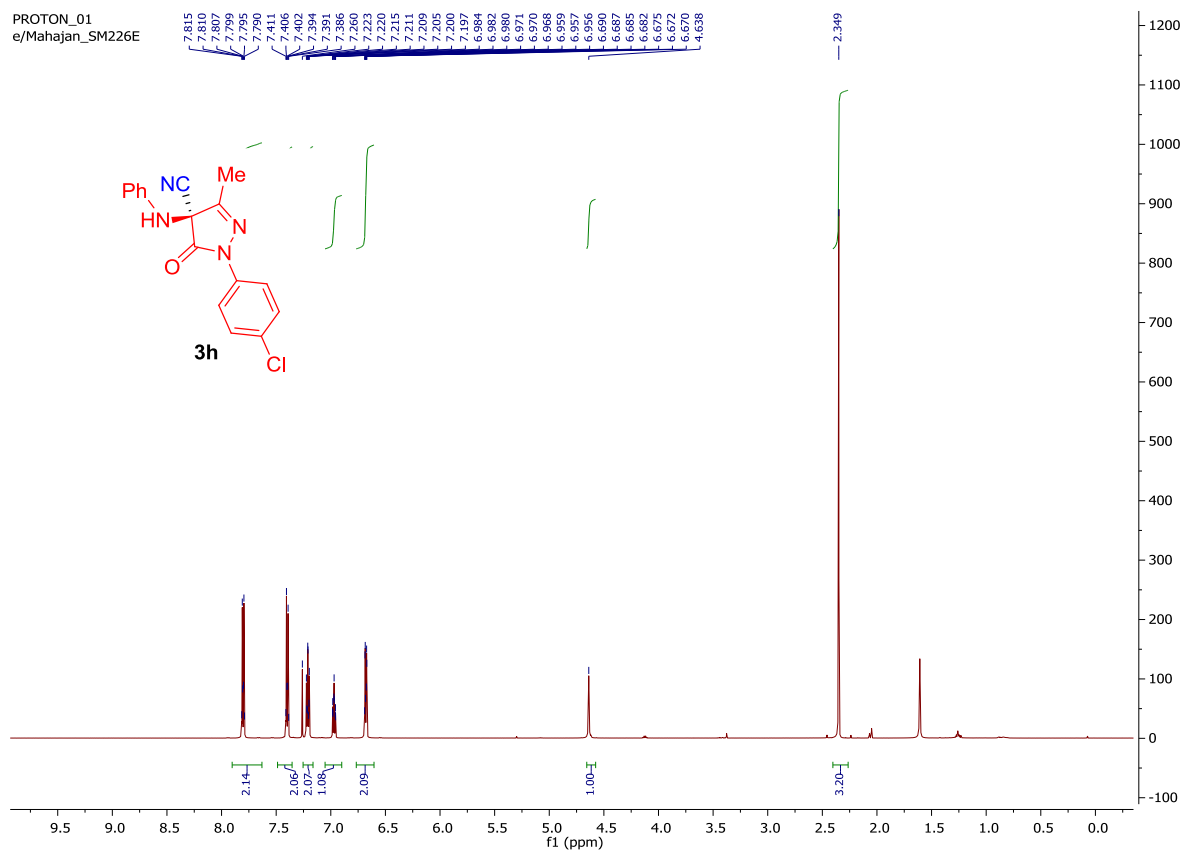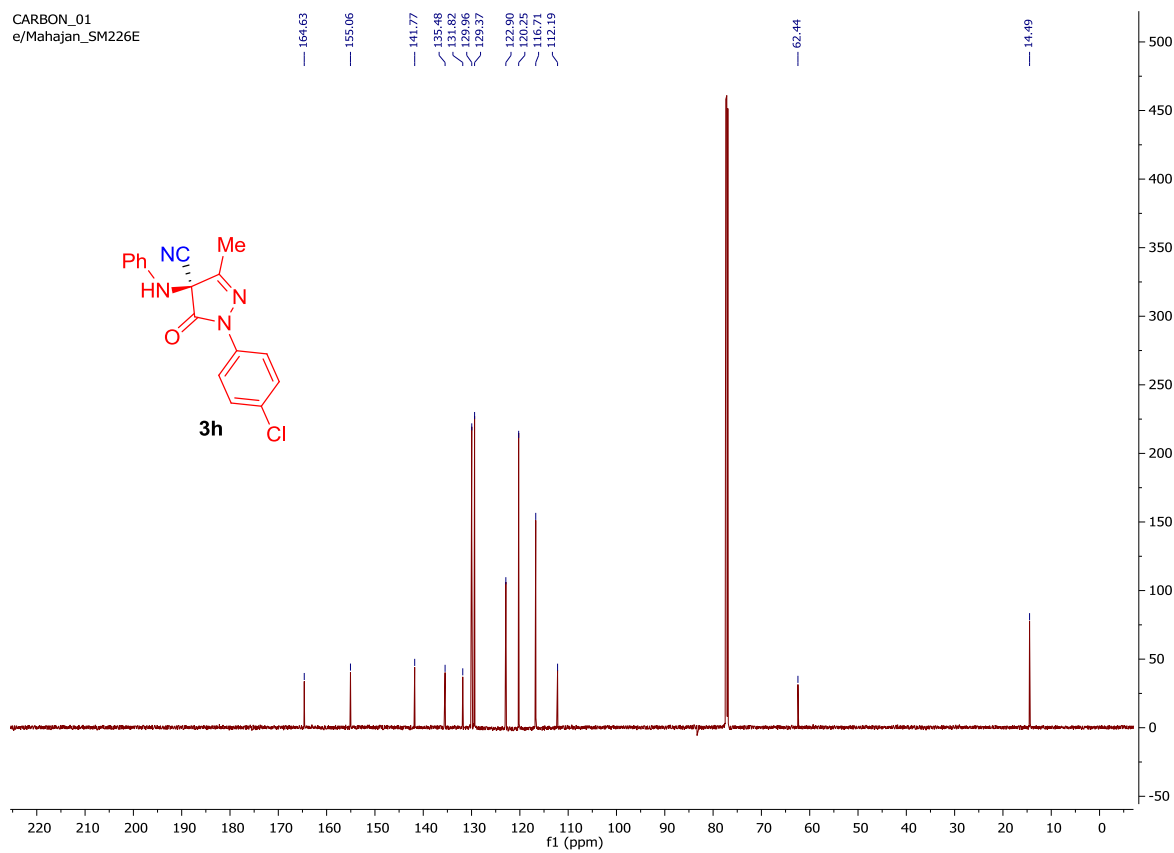

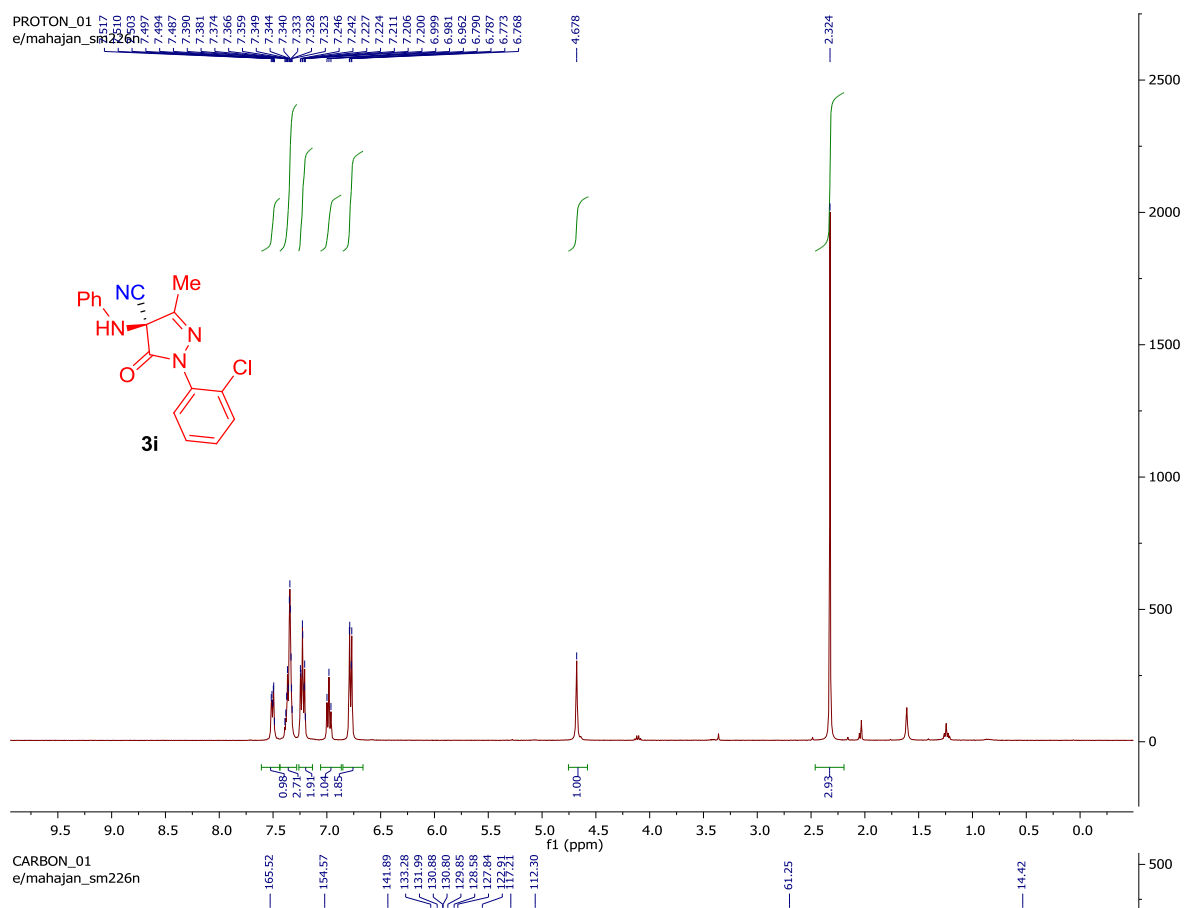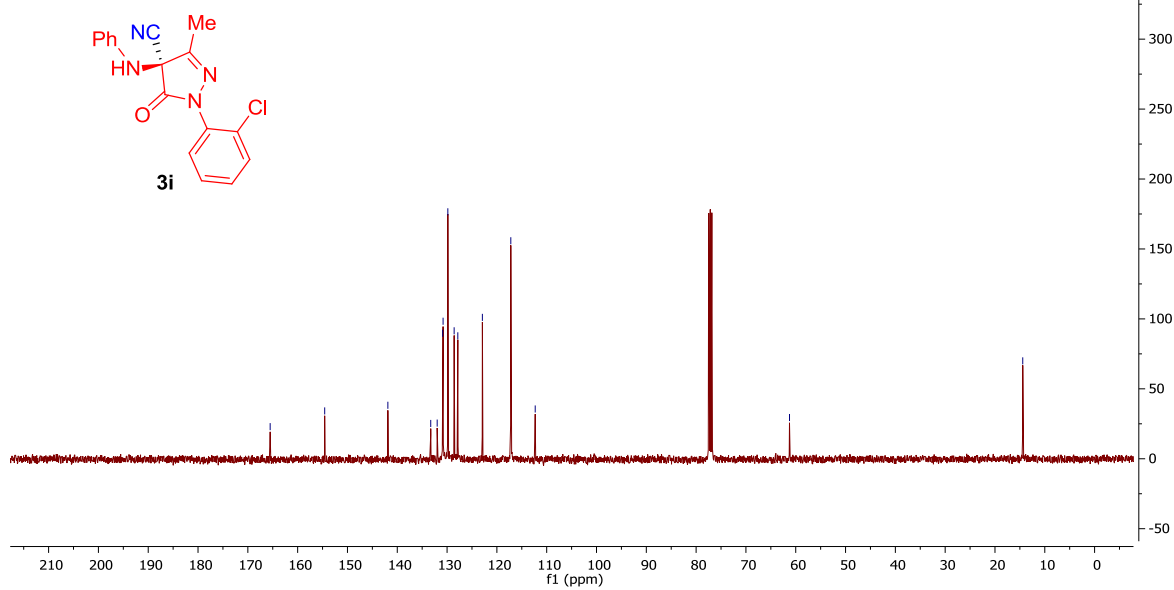



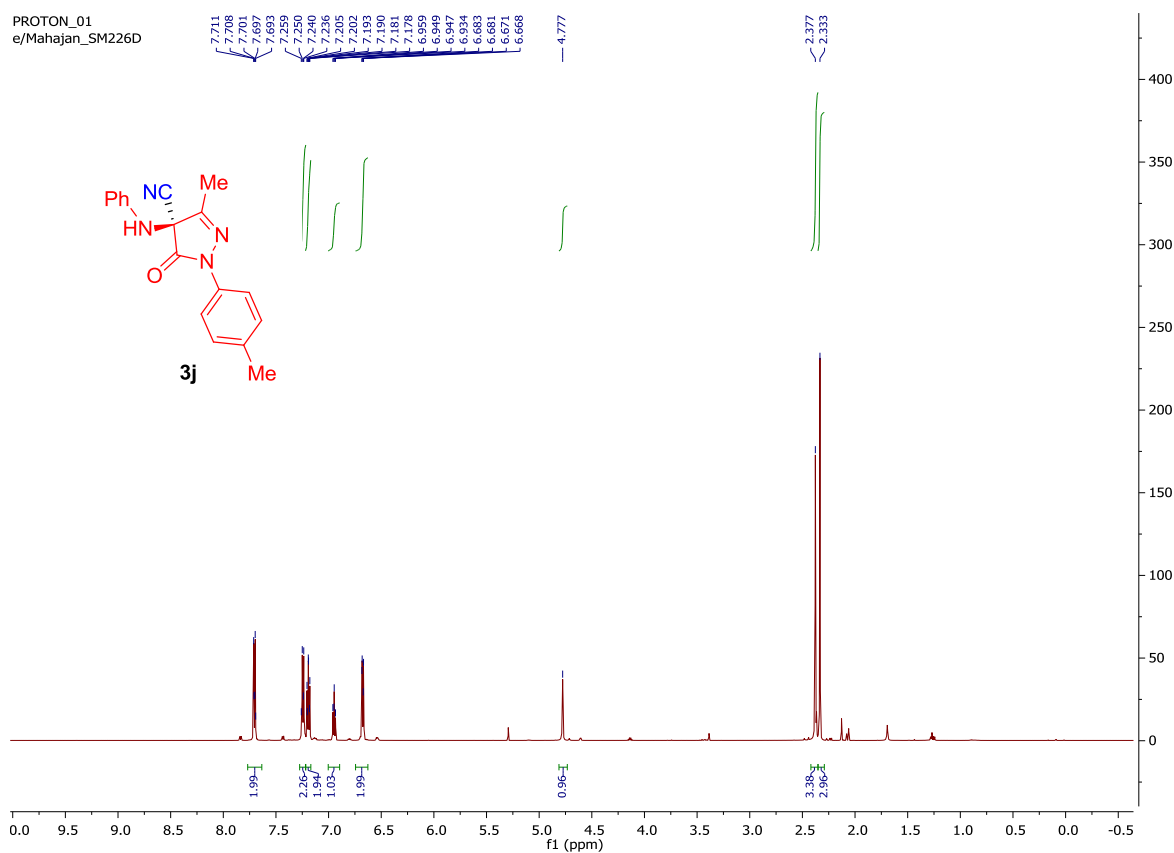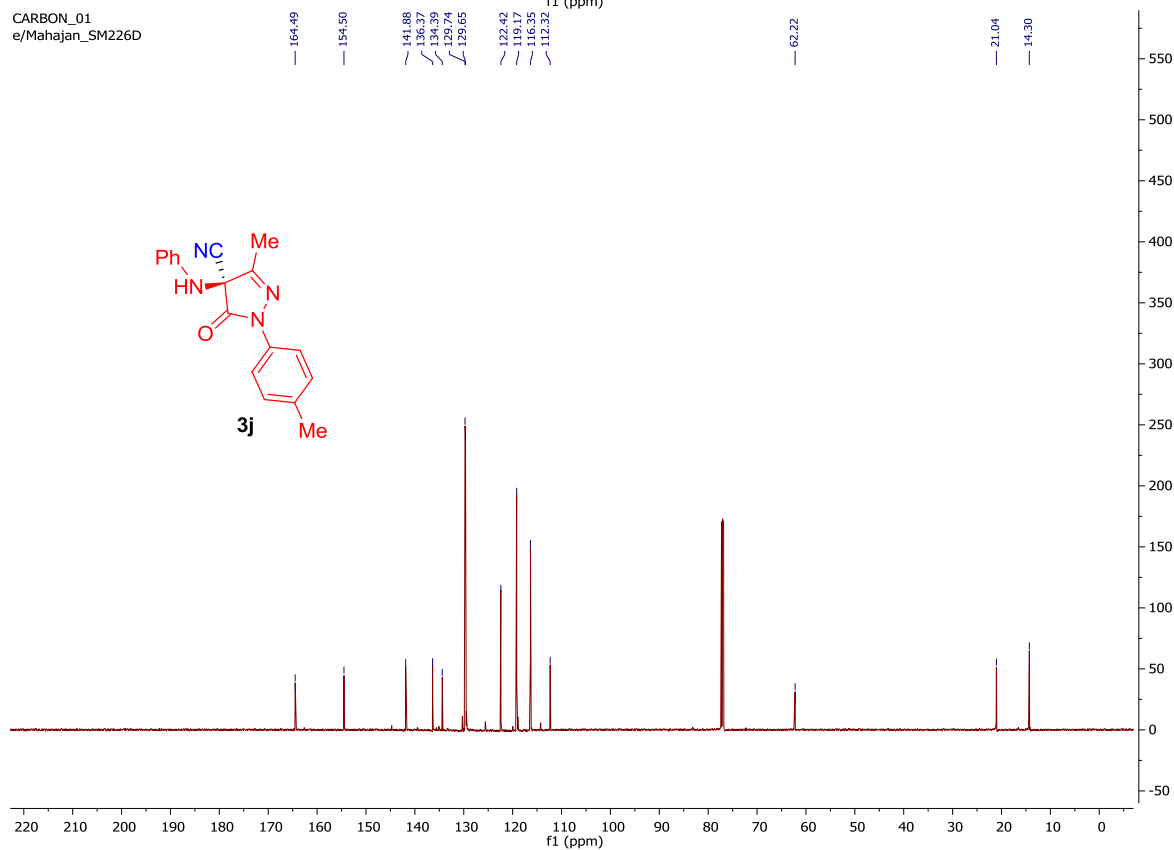



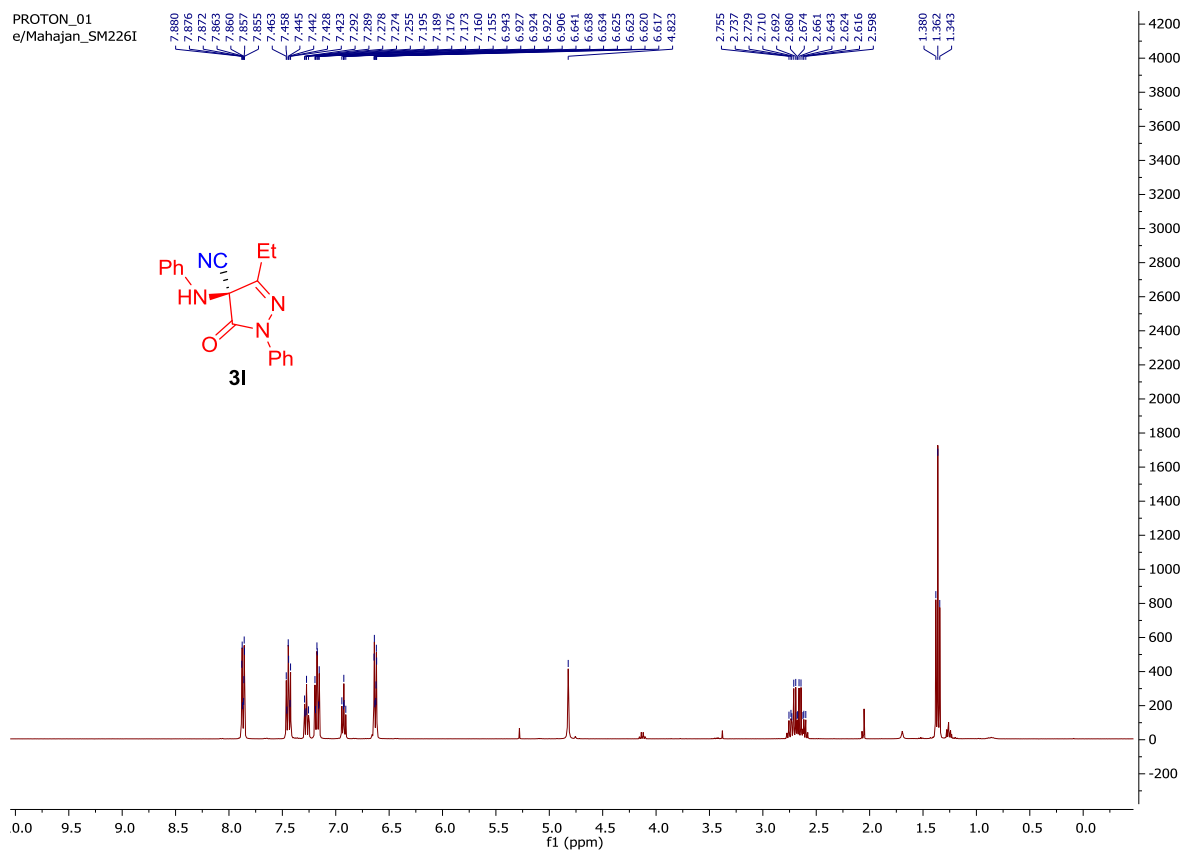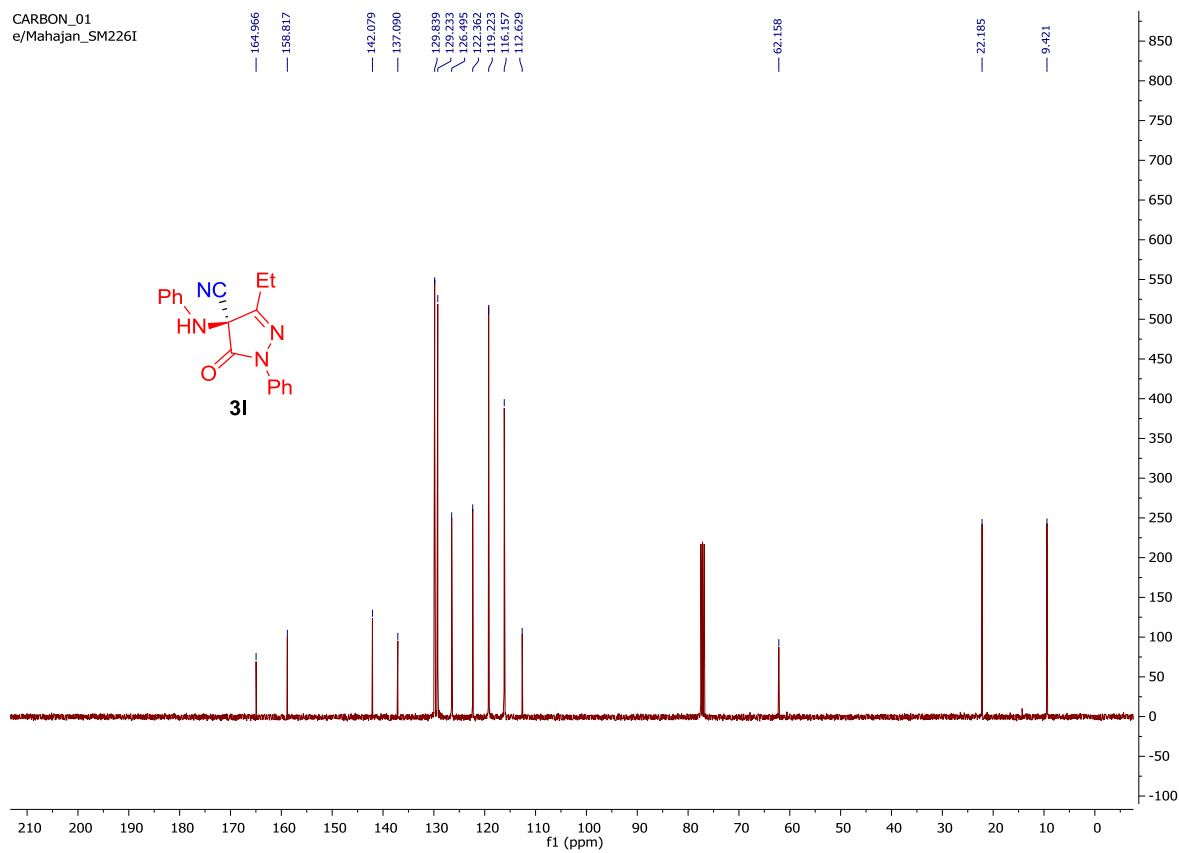

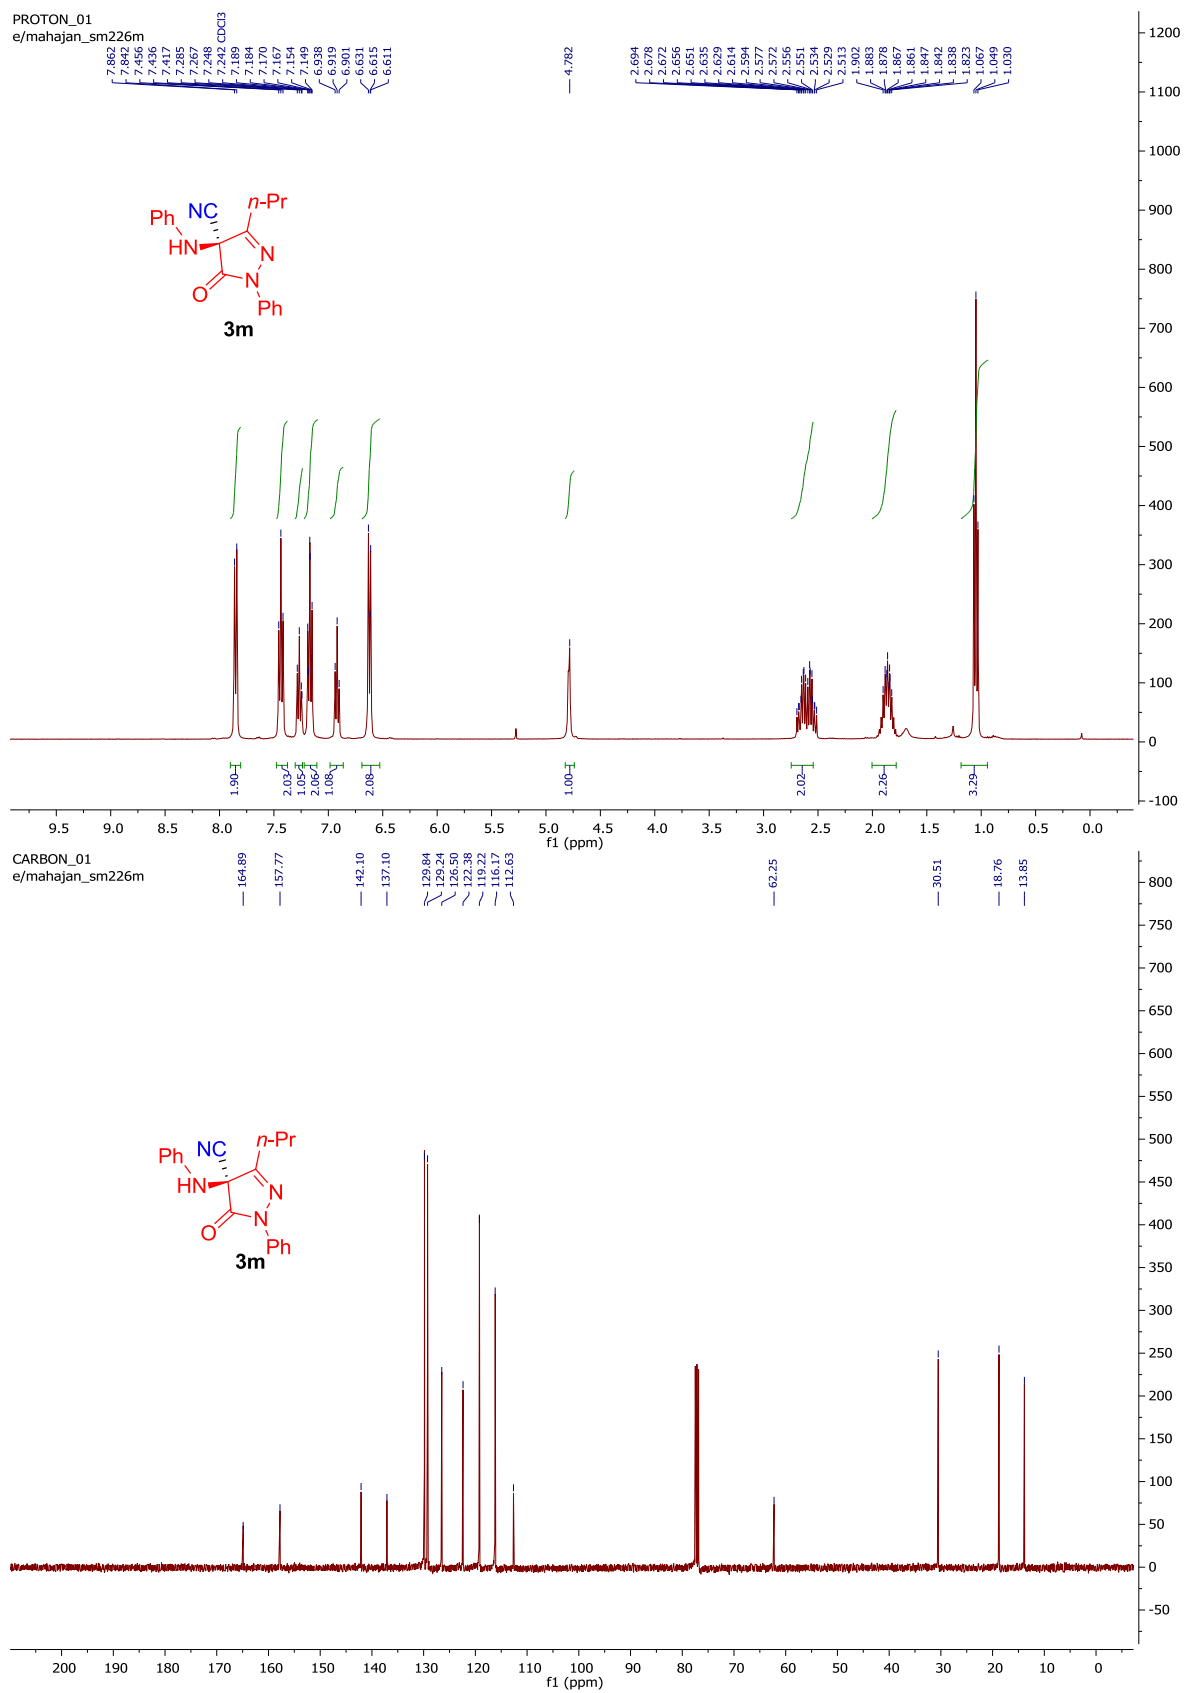

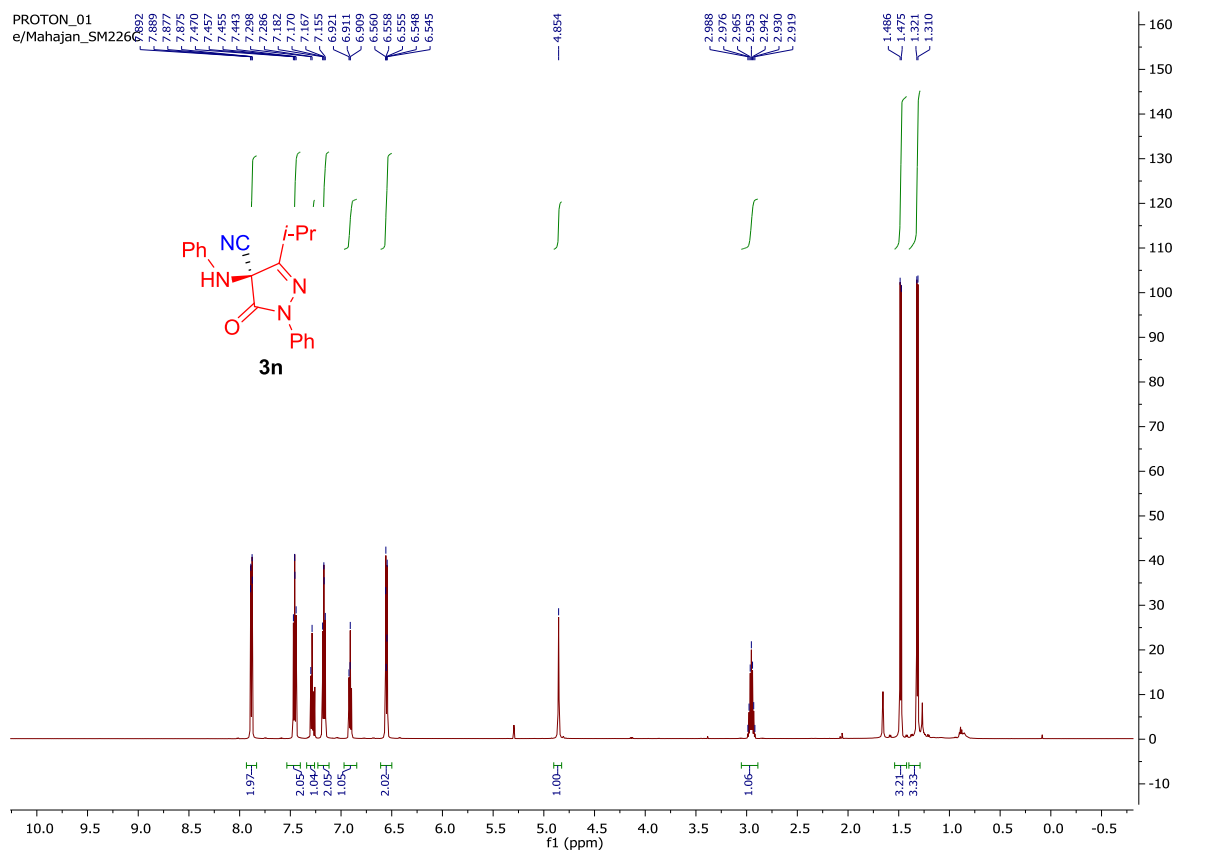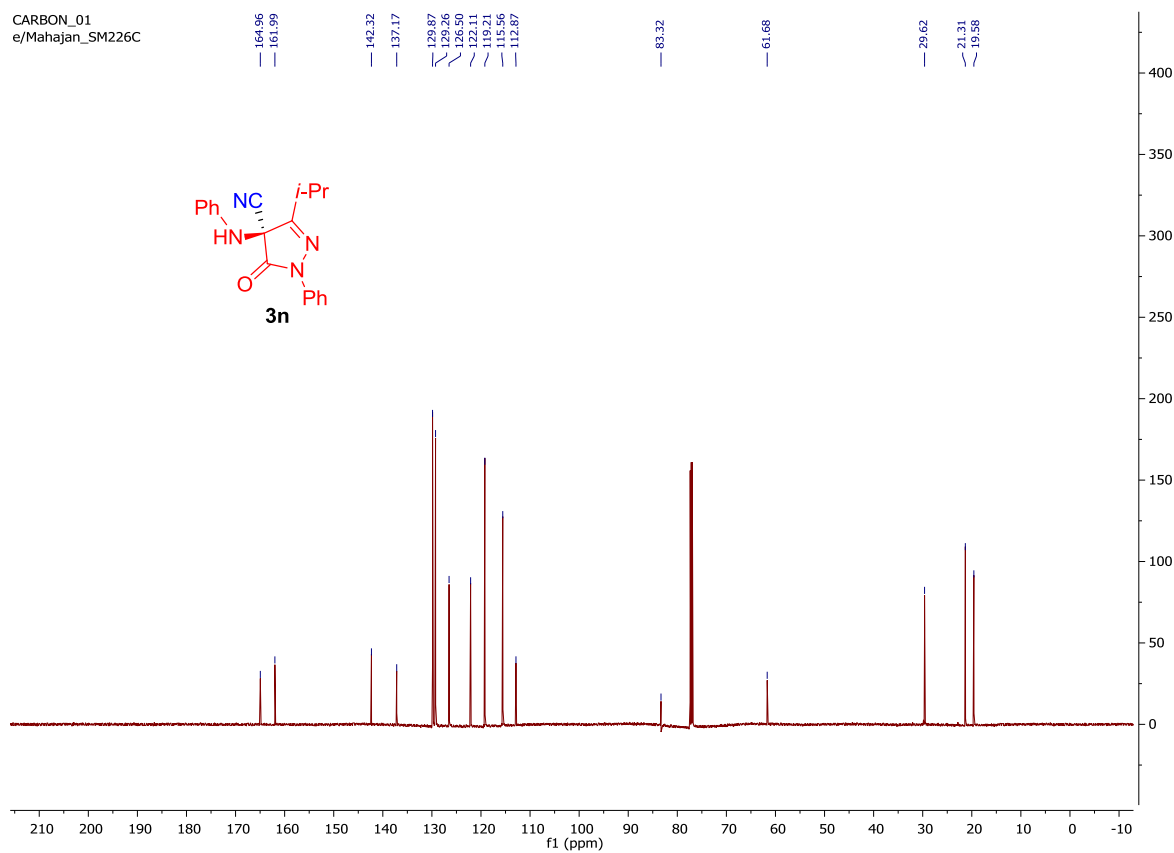

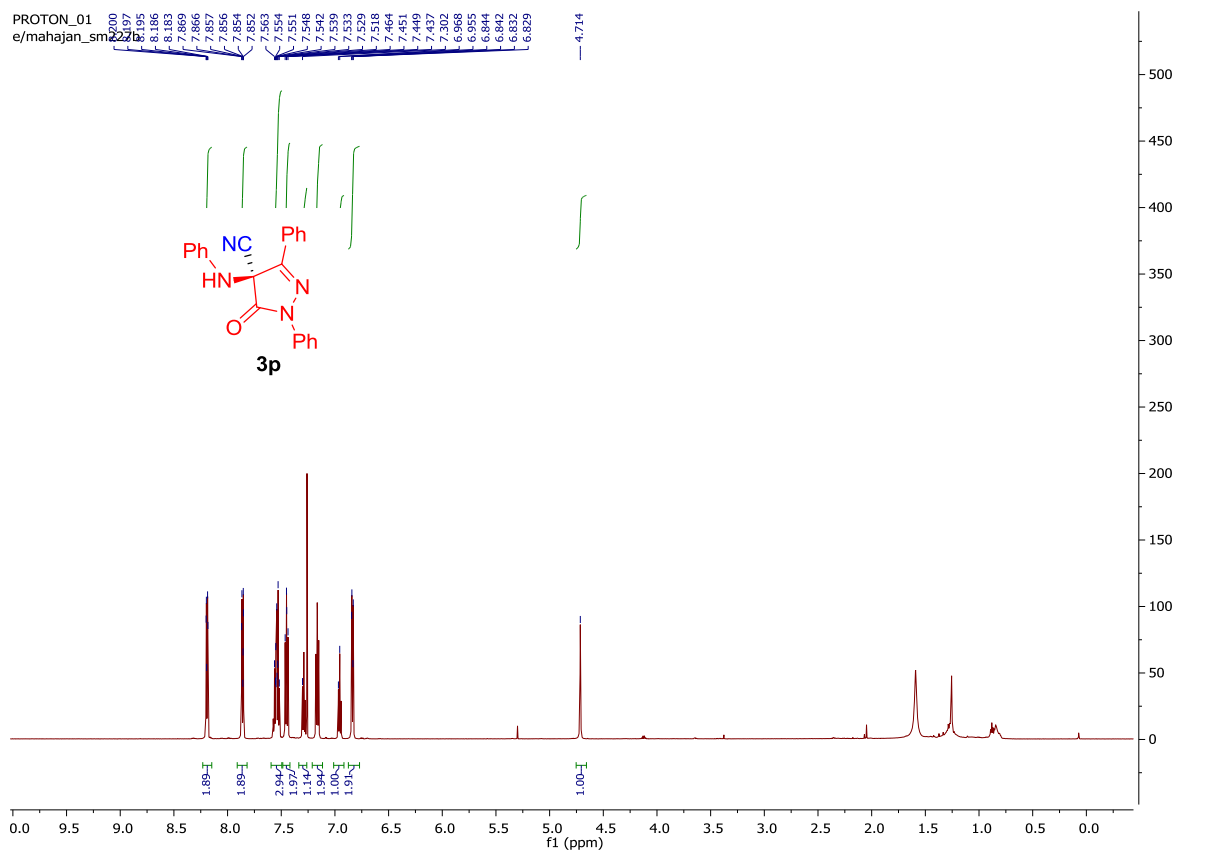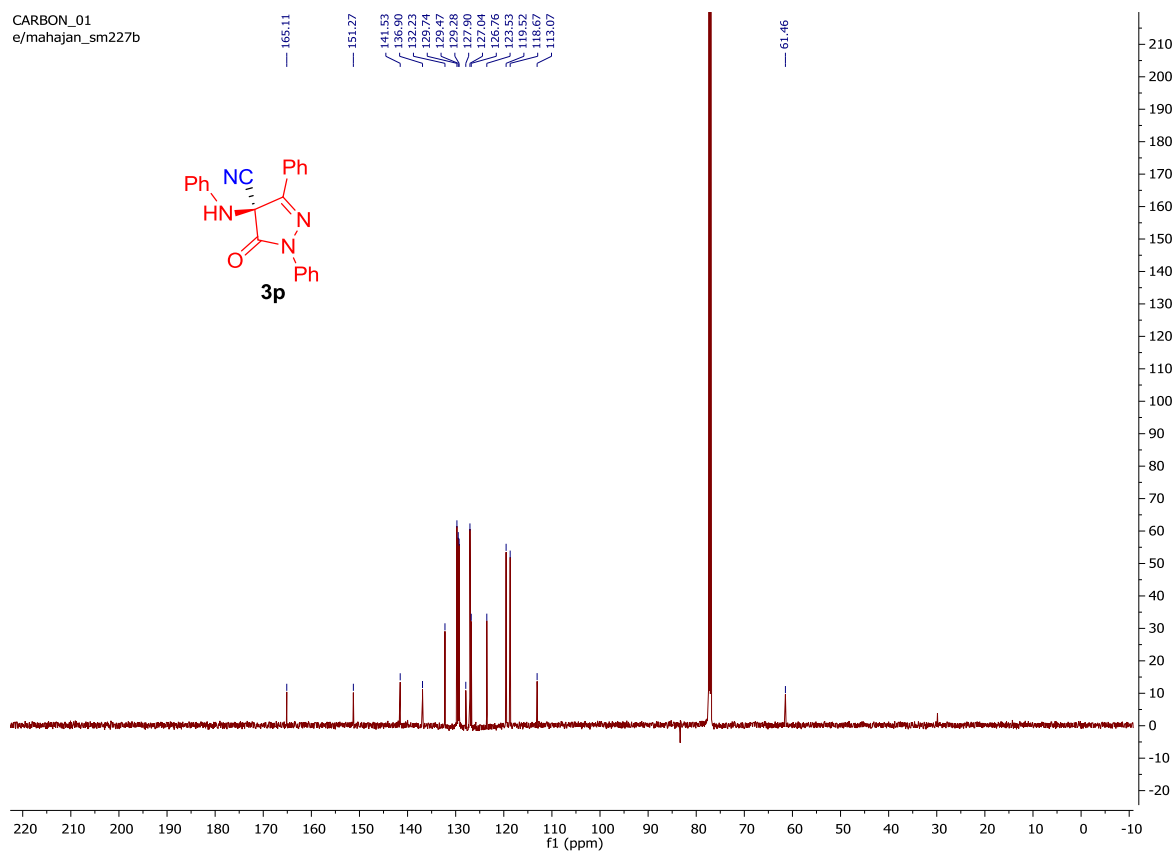

PROTON\_01  
e/chaugan\_pc1110

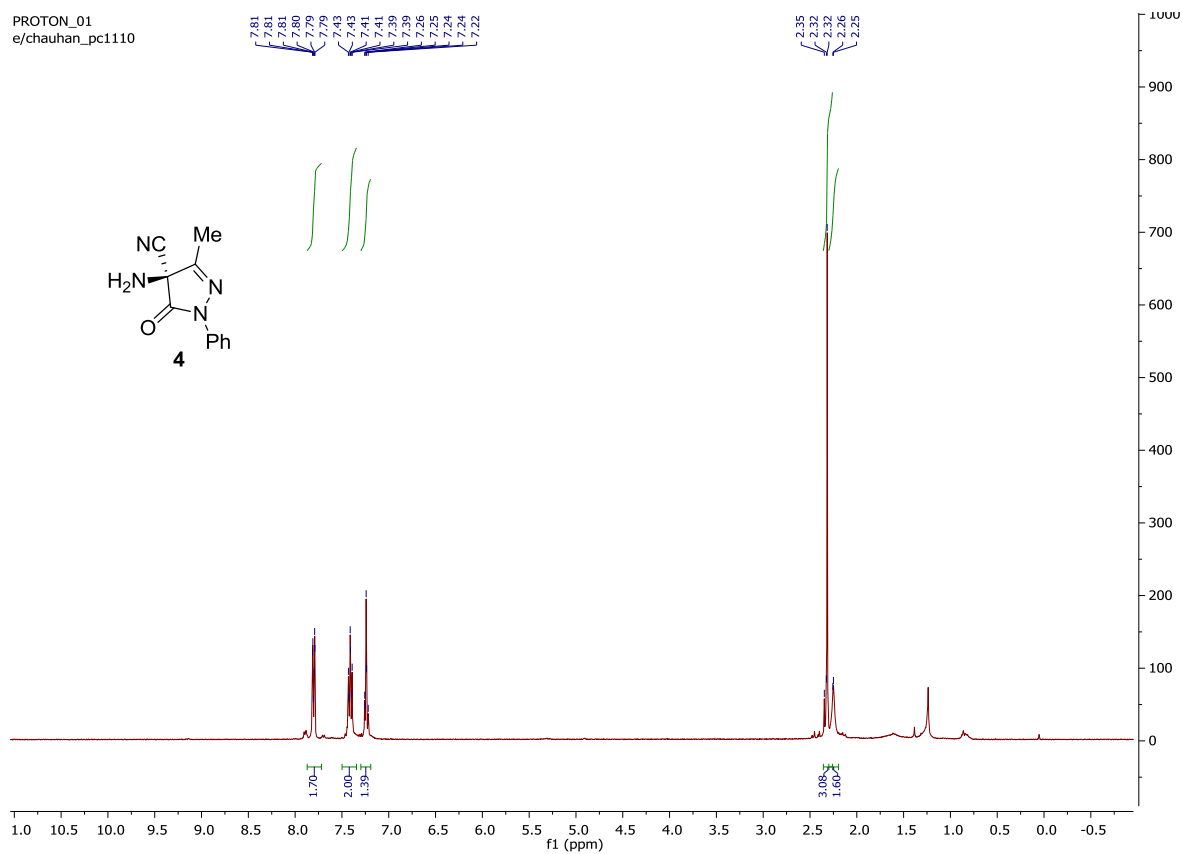

CARBON\_01  
e/Chaugan\_PC1109

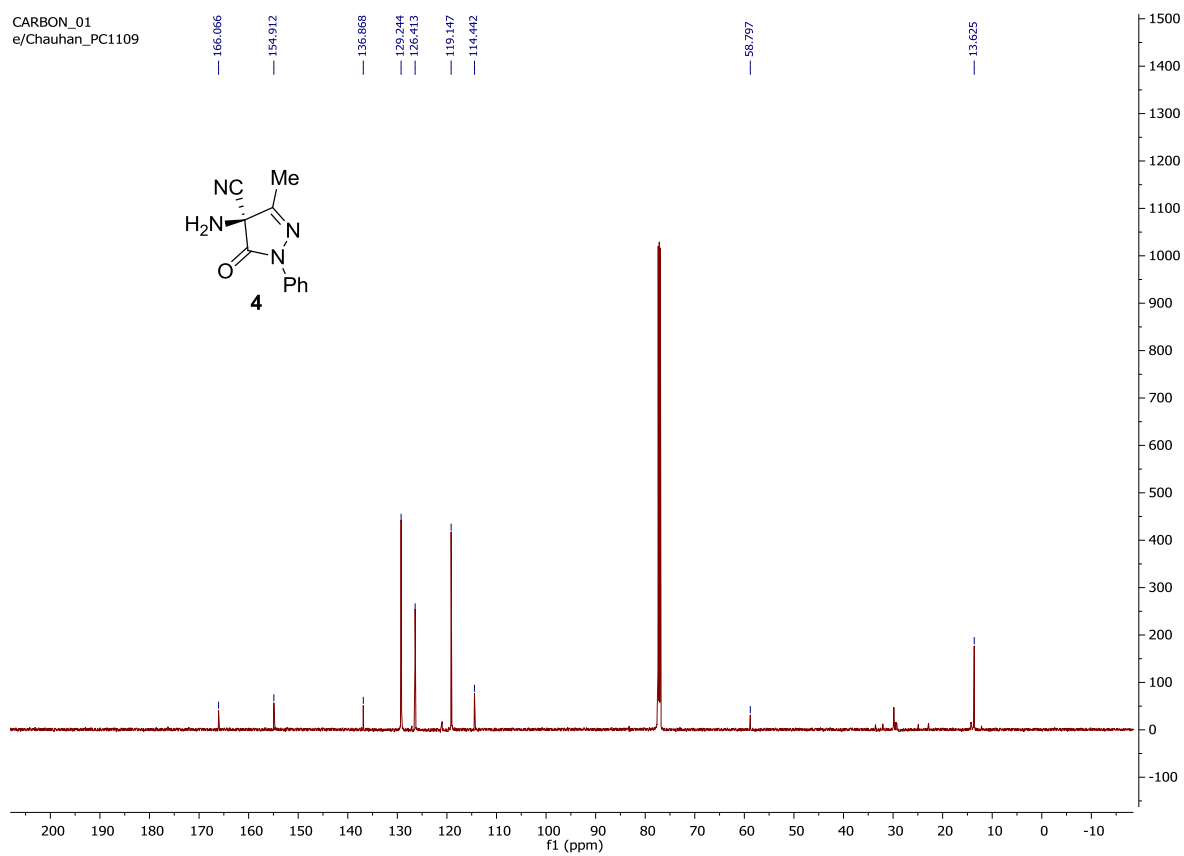

## HPLC Data:

AK Prof. Enders - Analytiklabor 4.04

**RWTH AACHEN**  
UNIVERSITY

Sample name: **SM 226 L**

Data file: C:\SNOOPY\SM\226LIC.D

Description: Mobile phase: n-Heptane/iPrOH 97:3 ;  
The sample is solved in DCM/MP

Injection date: 8/25/2016 3:36:41 PM

Acq. Analysis method: CHIRALPAKIC1-6LNP.M

Column: Chiralpak IC, (150 x 4,6) mm, 5µ, SN: IC00CD-QF015

Pressure at start: 23 bar Start flow: 0.700 ml/min Column oven: 29.98 °C

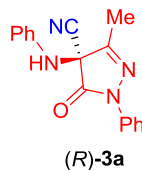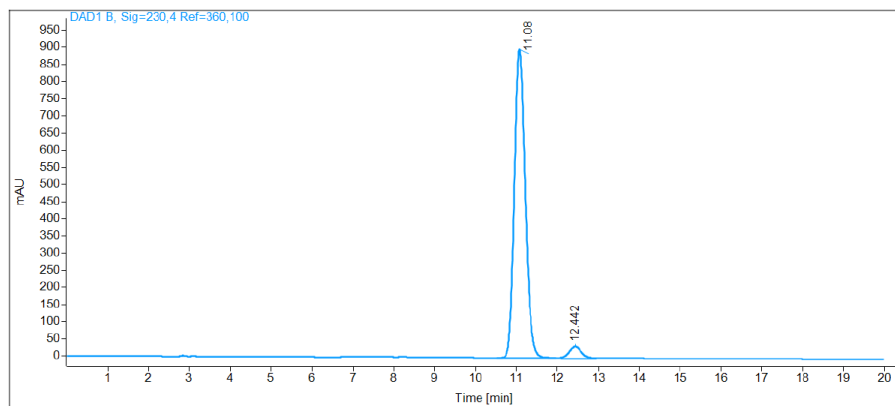

Name SM 226 L

| RT [min] | Type | Area%  | Area     | Height | Width [min] |
|----------|------|--------|----------|--------|-------------|
| 11.08    | BV   | 95.49  | 16429.87 | 899.33 | 0.28        |
| 12.44    | MM   | 4.51   | 775.52   | 35.74  | 0.36        |
| Sum      |      | 100.00 | 17205.39 |        |             |

AK Prof. Enders - Analytiklabor 4.04

**RWTH AACHEN**  
UNIVERSITY

Sample name: **SM 227 L**

Data file: C:\SNOOPY\SM\227LIC.D

Description: Mobile phase: n-Heptane/iPrOH 97:3 ;  
The sample is solved in DCM/MP

Injection date: 8/25/2016 3:57:49 PM

Acq. Analysis method: CHIRALPAKIC1-6LNP.M

Column: Chiralpak IC, (150 x 4,6) mm, 5µ, SN: IC00CD-QF015

Pressure at start: 23 bar Start flow: 0.700 ml/min Column oven: 29.98 °C

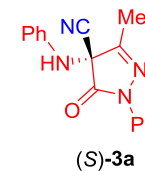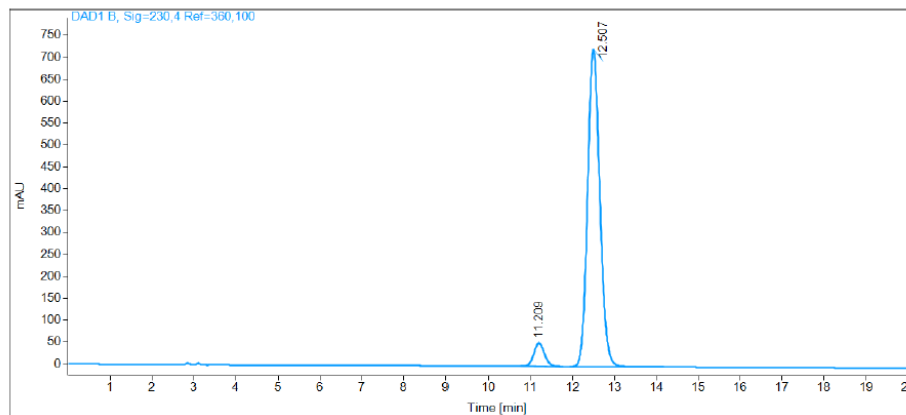

Name SM 227 L

| RT [min] | Type | Area%  | Area     | Height | Width [min] |
|----------|------|--------|----------|--------|-------------|
| 11.21    | MM   | 6.12   | 953.52   | 52.93  | 0.30        |
| 12.51    | BB   | 93.88  | 14637.44 | 723.92 | 0.31        |
| Sum      |      | 100.00 | 15590.96 |        |             |



Sample name: **SM 200**

Data file: C:\SNOOPY\SM\SM 200 IA.D

Description: Mobile phase: n-Heptane/iPrOH 7:3;  
The sample is solved in DCM/MP

Injection date: 3/23/2016 8:50:39 AM

Acq. Analysis method: CHIRALPAK-IARNP.M

Column: Chiralpak IA, (250 x 4,6) mm, 5µ, SN: IA00CE-RC036

Pressure at start: 30 bar Start flow: 0.500 ml/min Column oven: 29.99 °C

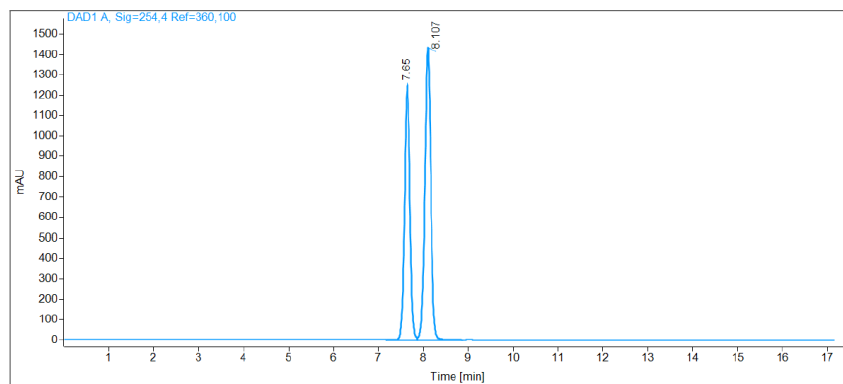

Name SM 200

| RT [min] | Type | Area%  | Area     | Height  | Width [min] |
|----------|------|--------|----------|---------|-------------|
| 7.65     | BV   | 44.81  | 10882.83 | 1249.23 | 0.14        |
| 8.11     | VV   | 55.19  | 13402.97 | 1432.66 | 0.15        |
| Sum      |      | 100.00 | 24285.80 |         |             |

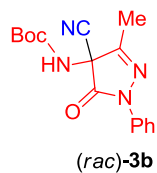Sample name: **SM2270 chiral**

Data file: C:\SNOOPY\PC\2270IA.D

Description: Mobile phase: n-Heptane/iPrOH 7:3; 0.5 ml min<sup>-1</sup> Chiralpak IA  
The sample is solved in DCM/MP

Injection date: 2/3/2017 10:30:43 AM

Acq. Analysis method: CHIRALPAK-IA.M

Column: Chiralpak IA, (250 x 4,6) mm, 5µ, SN: IA00CE-RC036

Pressure at start: 30 bar Start flow: 0.500 ml/min Column oven: 30 °C

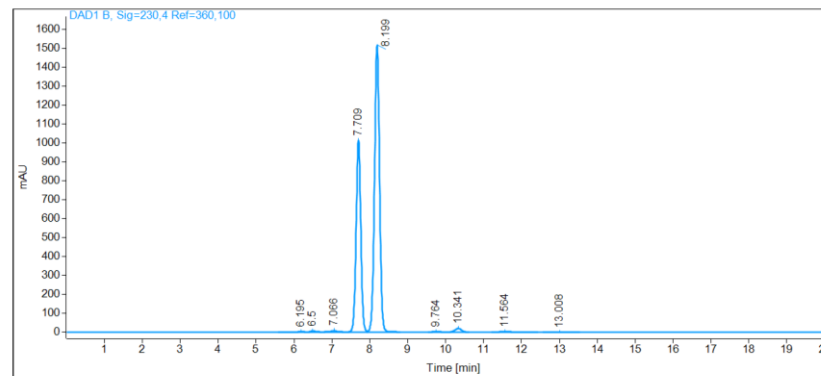

Name SM2270 chiral

| RT [min] | Type | Area% | Area     | Height  | Width [min] |
|----------|------|-------|----------|---------|-------------|
| 6.19     | BV   | 0.18  | 41.48    | 3.58    | 0.17        |
| 6.50     | VV   | 0.31  | 70.56    | 6.92    | 0.14        |
| 7.07     | VB   | 0.45  | 103.95   | 8.20    | 0.18        |
| 7.71     | BV   | 37.38 | 8630.44  | 1013.74 | 0.13        |
| 8.20     | VB   | 60.24 | 13907.24 | 1514.70 | 0.14        |

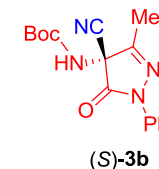

Sample Name: SM226F  
 Data file: D:\ERNIE\SM\226FAD.D  
 Sample Info: Mobile phase: n-Heptane/iPrOH 8:2

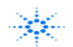

Agilent Technologies

The sample is solved in DCM/LM

Column: DAICELAD.M  
 Column info: (250 x 4)mm; 5µ non-chiral column

Operator: Analytical Lab AKEN

Injektion Time: 13:27:14  
 Injektion Date: 17.08.2016

Instrument Conditions: At Start At Stop

Temperature in °C: 30.0 30.0  
 Pressure in bar: 36.9 35.8  
 Flow in ml/min: 1.0 1.0

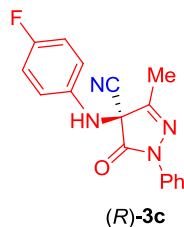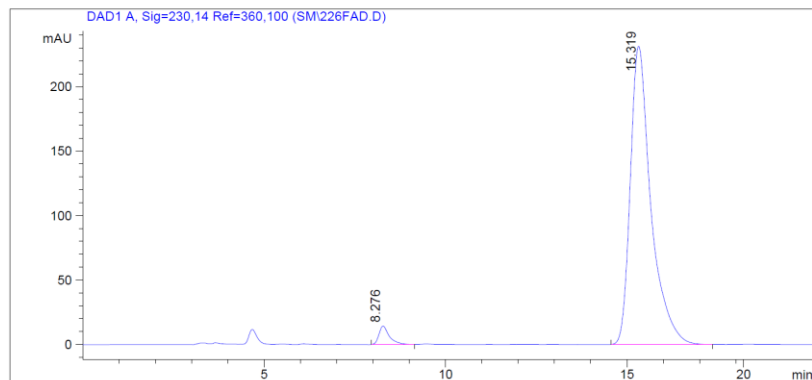

| #     | Ret. Time (min) | Width | Height (mAU) | Area (mAU*s) | Area % |
|-------|-----------------|-------|--------------|--------------|--------|
| 1     | 8.28            | 0.30  | 14.33        | 284.71       | 3.03   |
| 2     | 15.32           | 0.58  | 231.55       | 9126.17      | 96.97  |
| Total |                 |       |              | 9410.88      | 100.00 |

Sample Name: SM227F  
 Data file: D:\ERNIE\SM\227FAD.D  
 Sample Info: Mobile phase: n-Heptane/iPrOH 8:2

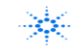

Agilent Technologies

The sample is solved in DCM/LM

Column: DAICELAD.M  
 Column info: (250 x 4)mm; 5µ non-chiral column

Operator: Analytical Lab AKEN

Injektion Time: 13:48:15  
 Injektion Date: 17.08.2016

Instrument Conditions: At Start At Stop

Temperature in °C: 30.0 30.0  
 Pressure in bar: 36.5 35.7  
 Flow in ml/min: 1.0 1.0

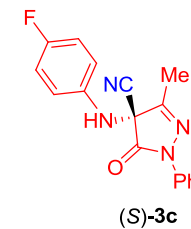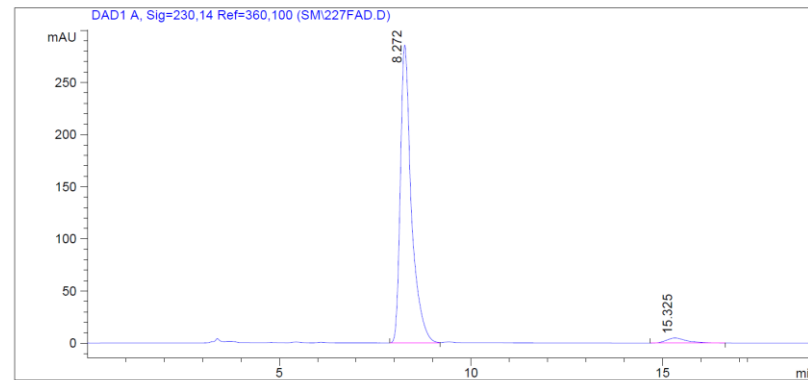

| #     | Ret. Time (min) | Width | Height (mAU) | Area (mAU*s) | Area % |
|-------|-----------------|-------|--------------|--------------|--------|
| 1     | 8.27            | 0.29  | 286.02       | 5715.41      | 96.78  |
| 2     | 15.32           | 0.57  | 4.93         | 190.26       | 3.22   |
| Total |                 |       |              | 5905.67      | 100.00 |

Sample Name: SM226G  
 Data file: D:\ERNIE\SM\226GAD.D  
 Sample Info: Mobile phase: n-Heptane/iPrOH 7:3  
 ;  
 The sample is solved in DCM/LM

Column: DAICELAD.M  
 Column info: (250 x 4)mm; 5µ non-chiral column

Operator: Analytical Lab AKEN

Injektion Time: 15:05:13  
 Injektion Date: 17.08.2016

| Instrument Conditions: | At Start | At Stop |
|------------------------|----------|---------|
| Temperature in°C:      | 30.0     | 30.0    |
| Pressure in bar:       | 42.2     | 40.8    |
| Flow in ml/min:        | 1.0      | 1.0     |

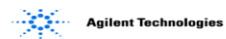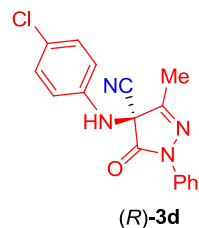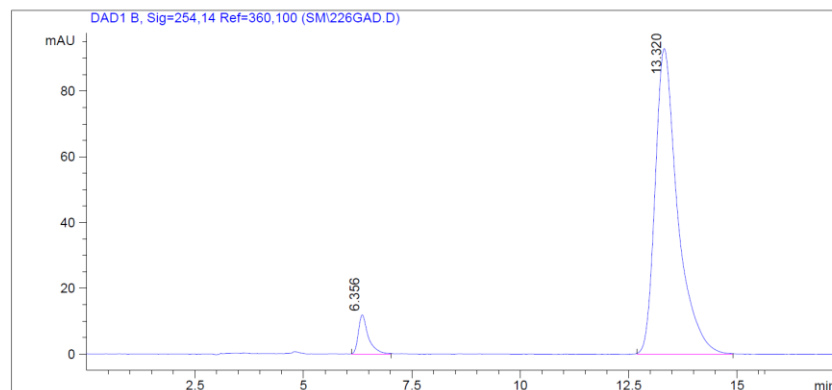

| #     | Ret. Time (min) | Width | Height (mAU) | Area (mAU*s) | Area % |
|-------|-----------------|-------|--------------|--------------|--------|
| 1     | 6.36            | 0.23  | 11.91        | 189.69       | 5.36   |
| 2     | 13.32           | 0.54  | 92.98        | 3352.00      | 94.64  |
| Total |                 |       |              | 3541.69      | 100.00 |

Sample Name: SM227G  
 Data file: D:\ERNIE\SM\227G2AD.D  
 Sample Info: Mobile phase: n-Heptane/iPrOH 7:3  
 ;  
 The sample is solved in DCM/LM

Column: DAICELAD.M  
 Column info: (250 x 4.6)mm 10µ

Operator: Analytical Lab AKEN

Injektion Time: 07:47:25  
 Injektion Date: 18.08.2016

| Instrument Conditions: | At Start | At Stop |
|------------------------|----------|---------|
| Temperature in°C:      | 30.0     | 30.0    |
| Pressure in bar:       | 42.0     | 41.1    |
| Flow in ml/min:        | 1.0      | 1.0     |

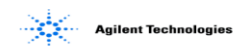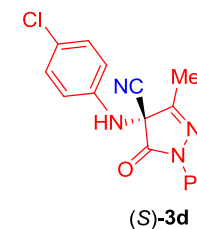

->

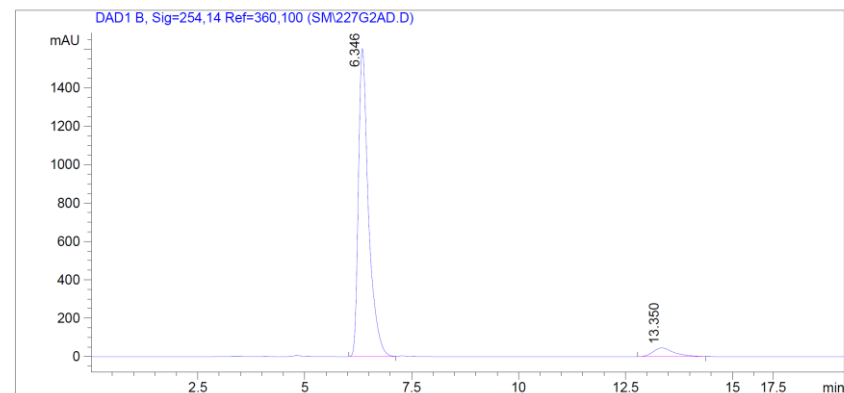

| #     | Ret. Time (min) | Width | Height (mAU) | Area (mAU*s) | Area % |
|-------|-----------------|-------|--------------|--------------|--------|
| 1     | 6.35            | 0.24  | 1606.19      | 26431.27     | 94.42  |
| 2     | 13.35           | 0.51  | 45.35        | 1562.30      | 5.58   |
| Total |                 |       |              | 27993.57     | 100.00 |

Sample name: PC-1116

Data file: C:\SNOOPY\PC\PC1116.D

Description: Mobile phase: n-Heptane/iPrOH 9:1; flow rate 1.0 ml/min  
The sample is solved in DCM/MP

Injection date: 5/22/2017 10:40:51 AM

Acq. Analysis method: CHIRALPAK-IA.M

Column: Chiralpak IA, (250 x 4,6) mm, 5 $\mu$ , SN: IA00CE-RC036

Pressure at start: 44 bar Start flow: 1.000 ml/min Column oven: 30 °C

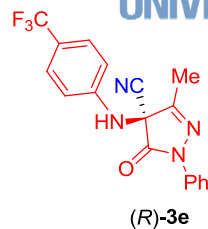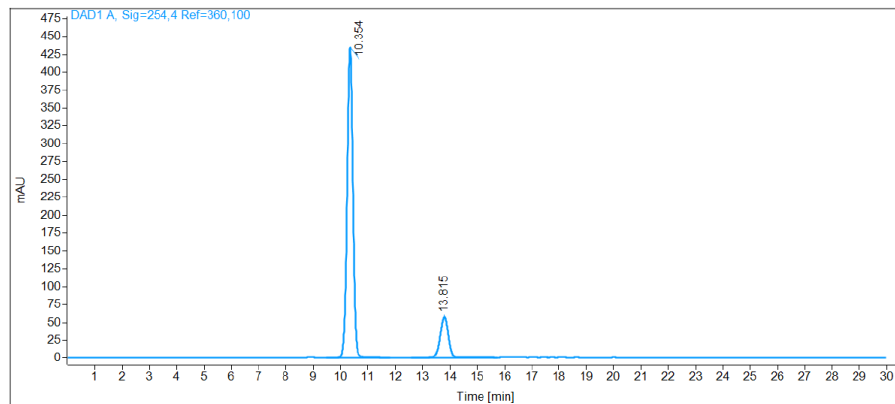

Name PC-1116

| RT [min] | Type | Area%  | Area    | Height | Width [min] |
|----------|------|--------|---------|--------|-------------|
| 10.35    | BB   | 84.51  | 6282.66 | 434.16 | 0.22        |
| 13.81    | BB   | 15.49  | 1151.75 | 56.98  | 0.31        |
| Sum      |      | 100.00 | 7434.41 |        |             |

Sample name: PC-1117

Data file: C:\SNOOPY\PC\PC1117.D

Description: Mobile phase: n-Heptane/iPrOH 9:1; flow rate 1.0 ml/min  
The sample is solved in DCM/MP

Injection date: 5/22/2017 11:11:57 AM

Acq. Analysis method: CHIRALPAK-IA.M

Column: Chiralpak IA, (250 x 4,6) mm, 5 $\mu$ , SN: IA00CE-RC036

Pressure at start: 44 bar Start flow: 1.000 ml/min Column oven: 30 °C

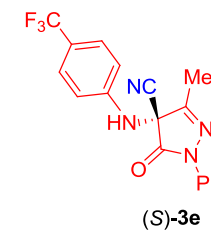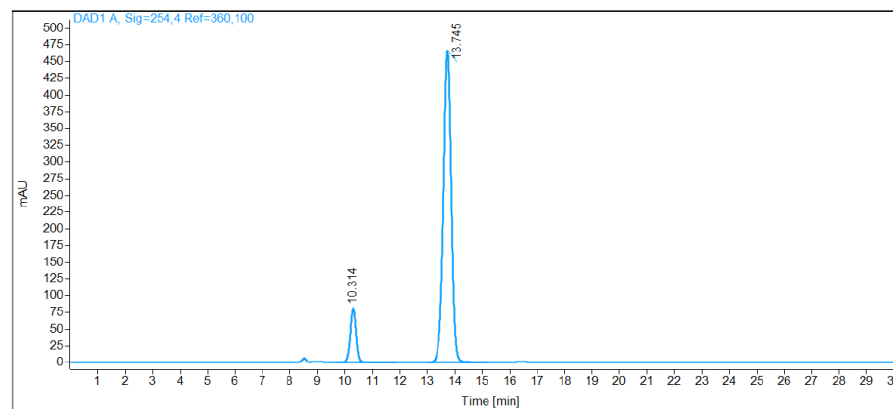

Name PC-1117

| RT [min] | Type | Area%  | Area     | Height | Width [min] |
|----------|------|--------|----------|--------|-------------|
| 10.31    | BB   | 11.15  | 1165.34  | 80.42  | 0.23        |
| 13.75    | BB   | 88.85  | 9287.22  | 466.15 | 0.31        |
| Sum      |      | 100.00 | 10452.56 |        |             |

Sample Name: SM226H  
 Data file: D:\ERNIE\SM\226HAD.D  
 Sample Info: Mobile phase: n-Heptane/iPrOH 7:3  
 ;  
 The sample is solved in DCM/LM

Column: DAICELAD.M  
 Column info: (250 x 4)mm; 5µ non-chiral column

Operator: Analytical Lab AKEN

Injektion Time: 08:06:24  
 Injektion Date: 18.08.2016

Instrument Conditions: At Start At Stop

Temperature in °C: 30.0 30.0  
 Pressure in bar: 41.5 41.2  
 Flow in ml/min: 1.0 1.0

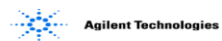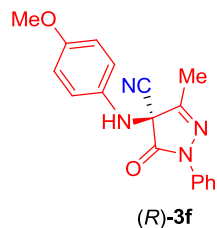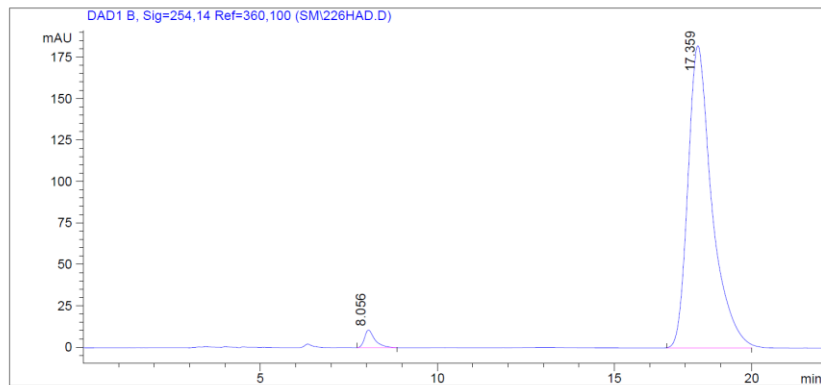

| #     | Ret. Time (min) | Width | Height (mAU) | Area (mAU*s) | Area % |
|-------|-----------------|-------|--------------|--------------|--------|
| 1     | 8.06            | 0.30  | 10.64        | 217.26       | 2.46   |
| 2     | 17.36           | 0.70  | 182.33       | 8632.19      | 97.54  |
| Total |                 |       |              | 8849.45      | 100.00 |

Sample Name: SM227H  
 Data file: D:\ERNIE\SM\227HAD.D  
 Sample Info: Mobile phase: n-Heptane/iPrOH 7:3  
 ;  
 The sample is solved in DCM/LM

Column: DAICELAD.M  
 Column info: (250 x 4)mm; 5µ non-chiral column

Operator: Analytical Lab AKEN

Injektion Time: 08:28:01  
 Injektion Date: 18.08.2016

Instrument Conditions: At Start At Stop

Temperature in °C: 30.0 30.0  
 Pressure in bar: 42.4 41.2  
 Flow in ml/min: 1.0 1.0

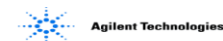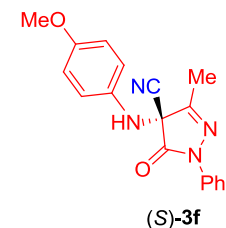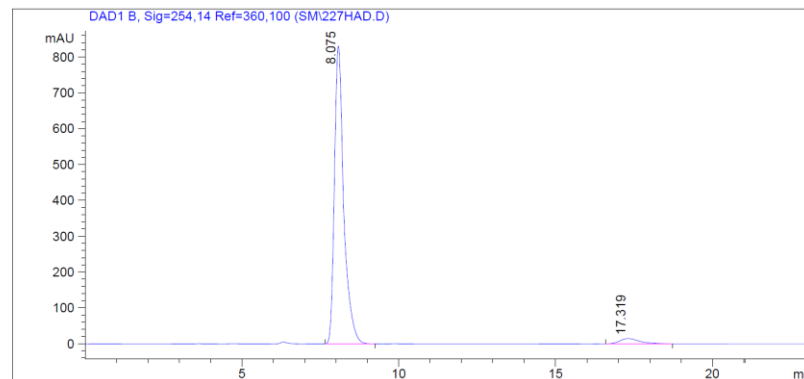

| #     | Ret. Time (min) | Width | Height (mAU) | Area (mAU*s) | Area % |
|-------|-----------------|-------|--------------|--------------|--------|
| 1     | 8.07            | 0.31  | 831.68       | 17159.04     | 96.24  |
| 2     | 17.32           | 0.66  | 15.09        | 671.02       | 3.76   |
| Total |                 |       |              | 17830.05     | 100.00 |

Sample Name: SM226J  
 Data file: D:\ERNIE\SM\226JAD.D  
 Sample Info: Mobile phase: n-Heptane/iPrOH 7:3 ;  
 The sample is solved in DCM/LM

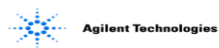

Column: DAICELAD.M  
 Column info: (250 x 4)mm; 5µ non-chiral column

Operator: Analytical Lab AKEN

Injektion Time: 09:07:35  
 Injektion Date: 29.08.2016

Instrument Conditions: At Start At Stop

Temperature in °C: 30.0 30.0  
 Pressure in bar: 42.2 40.7  
 Flow in ml/min: 1.0 1.0

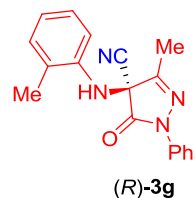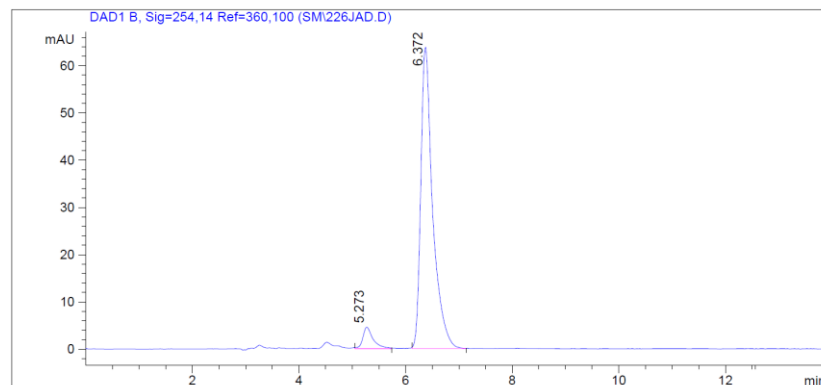

| #     | Ret. Time (min) | Width | Height (mAU) | Area (mAU*s) | Area % |
|-------|-----------------|-------|--------------|--------------|--------|
| 1     | 5.27            | 0.20  | 4.57         | 61.16        | 5.84   |
| 2     | 6.37            | 0.23  | 63.81        | 985.33       | 94.16  |
| Total |                 |       |              | 1046.49      | 100.00 |

Sample Name: SM227J  
 Data file: D:\ERNIE\SM\227JAD.D  
 Sample Info: Mobile phase: n-Heptane/iPrOH 7:3 ;  
 The sample is solved in DCM/LM

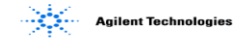

Column: DAICELAD.M  
 Column info: (250 x 4)mm; 5µ non-chiral column

Operator: Analytical Lab AKEN

Injektion Time: 09:22:12  
 Injektion Date: 29.08.2016

Instrument Conditions: At Start At Stop

Temperature in °C: 30.0 30.0  
 Pressure in bar: 41.8 41.0  
 Flow in ml/min: 1.0 1.0

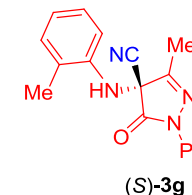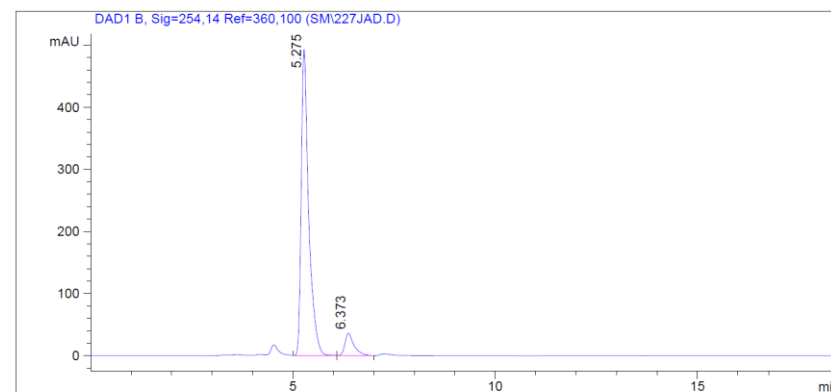

| #     | Ret. Time (min) | Width | Height (mAU) | Area (mAU*s) | Area % |
|-------|-----------------|-------|--------------|--------------|--------|
| 1     | 5.28            | 0.19  | 493.48       | 6335.99      | 91.85  |
| 2     | 6.37            | 0.23  | 36.13        | 561.87       | 8.15   |
| Total |                 |       |              | 6897.86      | 100.00 |

Sample Name: SM-226E  
 Data file: D:\ERNIE\SM\226EAD.D  
 Sample Info: Mobile phase: n-Heptane/iPrOH 7:3  
 ;  
 The sample is solved in DCM/LM

Column: DAICELAD.M  
 Column info: (250 x 4.6)mm 10µ

Operator: Analytical Lab AKEN

Injektion Time: 10:31:22  
 Injektion Date: 16.08.2016

| Instrument Conditions: | At Start | At Stop |
|------------------------|----------|---------|
| Temperature in°C:      | 30.0     | 30.0    |
| Pressure in bar:       | 41.7     | 41.2    |
| Flow in ml/min:        | 1.0      | 1.0     |

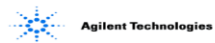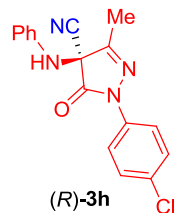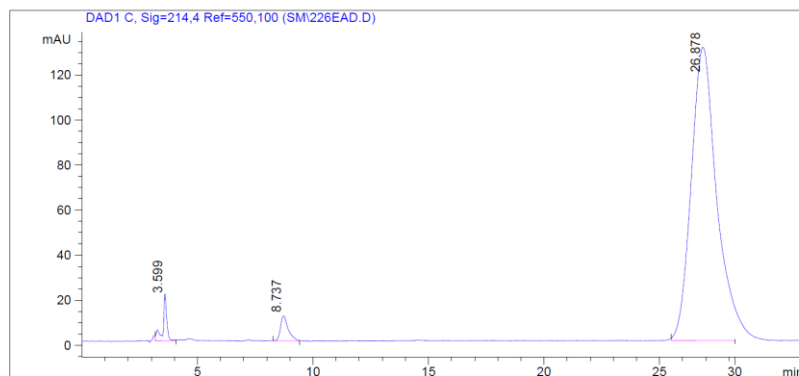

| #     | Ret. Time (min) | Width | Height (mAU) | Area (mAU*s) | Area %          |
|-------|-----------------|-------|--------------|--------------|-----------------|
| 1     | 3.60            | 0.21  | 19.67        | 240.35       | 2.27            |
| 2     | 8.74            | 0.37  | 11.06        | 257.24       | 2.43            |
| 3     | 26.88           | 1.16  | 130.16       | 10067.64     | 95.29           |
| Total |                 |       |              |              | 10565.23 100.00 |

->

Sample Name: SM-227E  
 Data file: D:\ERNIE\SM\227EAD.D  
 Sample Info: Mobile phase: n-Heptane/iPrOH 7:3  
 ;  
 The sample is solved in DCM/LM

Column: DAICELAD.M  
 Column info: (250 x 4.6)mm 10µ

Operator: Analytical Lab AKEN

Injektion Time: 11:03:35  
 Injektion Date: 16.08.2016

| Instrument Conditions: | At Start | At Stop |
|------------------------|----------|---------|
| Temperature in°C:      | 30.0     | 30.0    |
| Pressure in bar:       | 42.4     | 41.3    |
| Flow in ml/min:        | 1.0      | 1.0     |

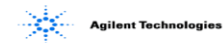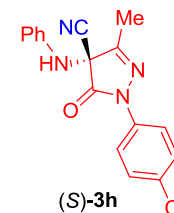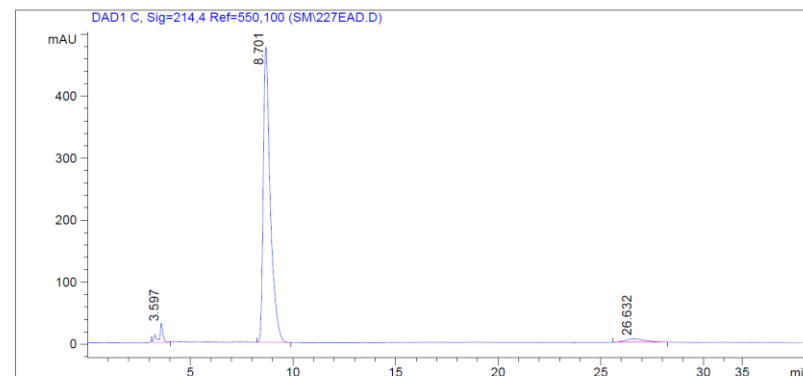

| #     | Ret. Time (min) | Width | Height (mAU) | Area (mAU*s) | Area %          |
|-------|-----------------|-------|--------------|--------------|-----------------|
| 1     | 3.60            | 0.24  | 27.59        | 410.22       | 3.39            |
| 2     | 8.70            | 0.39  | 454.51       | 11323.53     | 93.56           |
| 3     | 26.63           | 1.12  | 5.50         | 369.57       | 3.05            |
| Total |                 |       |              |              | 12103.33 100.00 |

->

Sample name: SM-227N  
 Data file: C:\SNOOPY\SM\227NIC.D  
 Description: Mobile phase: n-Heptane/i-PrOH 8:2 ;  
 The sample is solved in DCM/MP  
 Injection date: 11/16/2016 2:48:46 PM  
 Acq. Analysis method: CHIRALPAKIC1-6LNP.M  
 Column: Chiralpak IC, (150 x 4,6) mm, 5 $\mu$ , SN: IC00CD-QF015

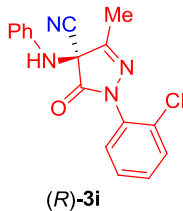

Pressure at start: 40 bar Start flow: 1.000 ml/min Column oven: 29.99 °C

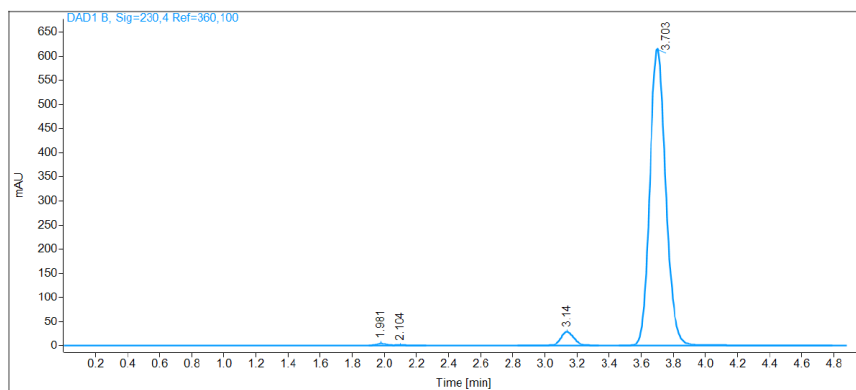

Name SM-227N

| RT [min] | Type | Area%  | Area    | Height | Width [min] |
|----------|------|--------|---------|--------|-------------|
| 1.98     | BV   | 0.49   | 21.75   | 5.15   | 0.07        |
| 2.10     | VV   | 0.11   | 4.93    | 1.00   | 0.07        |
| 3.14     | BB   | 3.74   | 166.05  | 29.03  | 0.09        |
| 3.70     | BB   | 95.66  | 4243.14 | 614.64 | 0.11        |
| Sum      |      | 100.00 | 4435.87 |        |             |

Sample name: SM-226N  
 Data file: C:\SNOOPY\SM\226NIC.D  
 Description: Mobile phase: n-Heptane/i-PrOH 8:2 ;  
 The sample is solved in DCM/MP  
 Injection date: 11/16/2016 2:40:34 PM  
 Acq. Analysis method: CHIRALPAKIC1-6LNP.M  
 Column: Chiralpak IC, (150 x 4,6) mm, 5 $\mu$ , SN: IC00CD-QF015

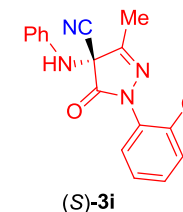

Pressure at start: 40 bar Start flow: 1.000 ml/min Column oven: 29.99 °C

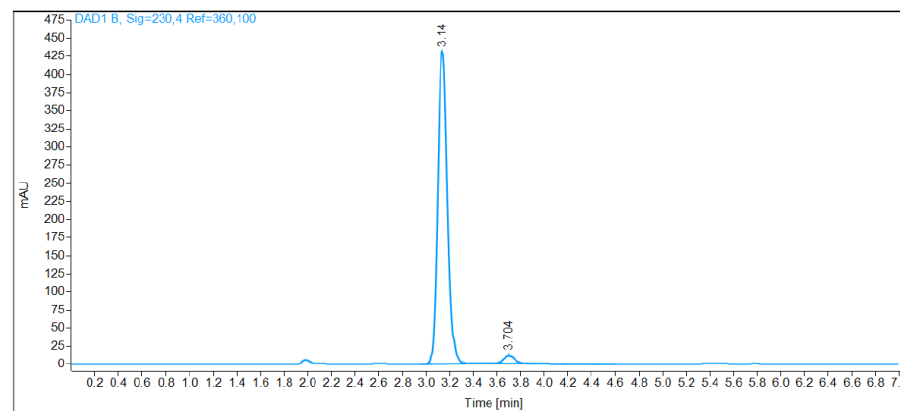

Name SM-226N

| RT [min] | Type | Area%  | Area    | Height | Width [min] |
|----------|------|--------|---------|--------|-------------|
| 3.14     | BB   | 96.77  | 2446.97 | 432.07 | 0.09        |
| 3.70     | BB   | 3.23   | 81.56   | 11.27  | 0.11        |
| Sum      |      | 100.00 | 2528.53 |        |             |



Sample Name: SM-226D  
 Data file: D:\ERNIE\SM\226DRAD.D  
 Sample Info: Mobile phase: n-Heptane/iPrOH 7:3

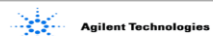

The sample is solved in DCM/LM

Column: DAICELAD.M  
 Column info: (250 x 4.6)mm 10µ

Operator: Analytical Lab AKEN

Injektion Time: 08:47:57  
 Injektion Date: 16.08.2016

Instrument Conditions: At Start At Stop

Temperature in °C: 30.0 30.0  
 Pressure in bar: 42.1 41.2  
 Flow in ml/min: 1.0 1.0

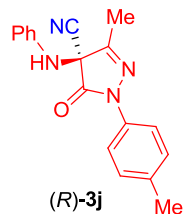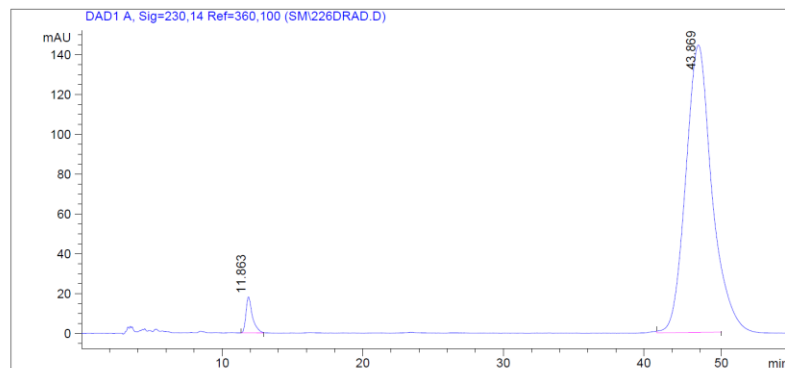

| #     | Ret. Time (min) | Width | Height (mAU) | Area (mAU*s) | Area % |
|-------|-----------------|-------|--------------|--------------|--------|
| 1     | 11.86           | 0.46  | 18.06        | 579.71       | 3.00   |
| 2     | 43.87           | 1.66  | 144.35       | 18747.02     | 97.00  |
| Total |                 |       |              | 19326.73     | 100.00 |

->

Sample Name: SM-227D  
 Data file: D:\ERNIE\SM\227DRAD.D  
 Sample Info: Mobile phase: n-Heptane/iPrOH 7:3

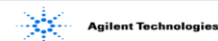

The sample is solved in DCM/LM

Column: DAICELAD.M  
 Column info: (250 x 4.6)mm 10µ

Operator: Analytical Lab AKEN

Injektion Time: 09:39:22  
 Injektion Date: 16.08.2016

Instrument Conditions: At Start At Stop

Temperature in °C: 30.0 30.0  
 Pressure in bar: 41.8 41.4  
 Flow in ml/min: 1.0 1.0

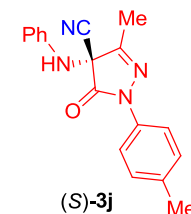

->

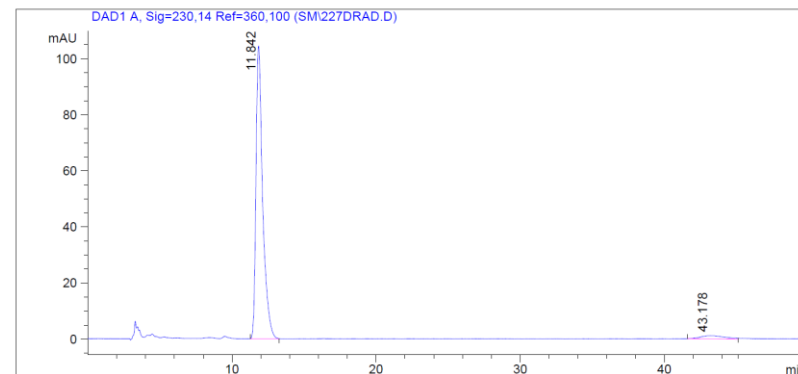

| #     | Ret. Time (min) | Width | Height (mAU) | Area (mAU*s) | Area % |
|-------|-----------------|-------|--------------|--------------|--------|
| 1     | 11.84           | 0.48  | 104.49       | 3366.11      | 95.76  |
| 2     | 43.18           | 2.12  | 1.17         | 149.08       | 4.24   |
| Total |                 |       |              | 3515.19      | 100.00 |

Sample Name: SM 226 K  
 Data file: D:\ERNIE\SM\226KAD.D  
 Sample Info: Mobile phase: n-Heptane/iPrOH 7:3 ;  
 The sample is solved in DCM/LM

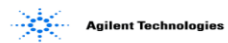

Column: DAICELAD.M  
 Column info: Chiralpak AD (250 x 4.6)mm 10μ

Operator: Analytical Lab AKEN

Injektion Time: 13:15:39  
 Injektion Date: 23.08.2016

Instrument Conditions: At Start At Stop

Temperature in °C: 30.0 30.0  
 Pressure in bar: 41.4 41.3  
 Flow in ml/min: 1.0 1.0

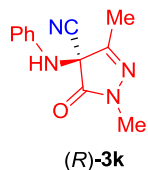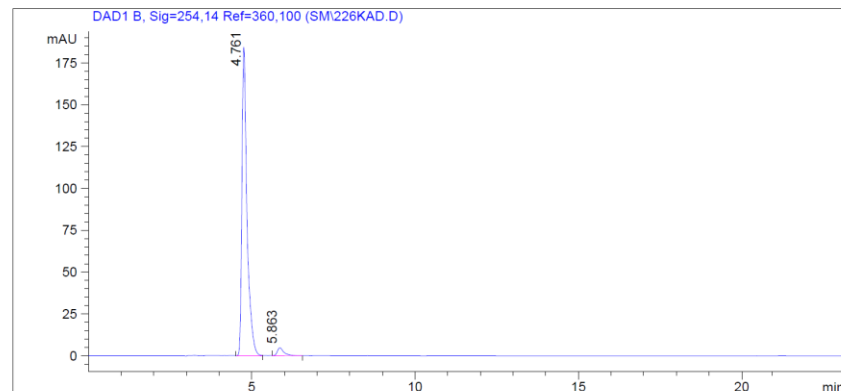

| #     | Ret. Time (min) | Width | Height (mAU) | Area (mAU*s) | Area % |
|-------|-----------------|-------|--------------|--------------|--------|
| 1     | 4.76            | 0.16  | 184.84       | 2007.76      | 96.62  |
| 2     | 5.86            | 0.21  | 4.86         | 70.34        | 3.38   |
| Total |                 |       |              |              | 100.00 |

Sample Name: SM 227 K  
 Data file: D:\ERNIE\SM\227KAD.D  
 Sample Info: Mobile phase: n-Heptane/iPrOH 7:3 ;  
 The sample is solved in DCM/LM

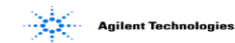

Column: DAICELAD.M  
 Column info: Chiralpak AD (250 x 4.6)mm 10μ

Operator: Analytical Lab AKEN

Injektion Time: 13:39:50  
 Injektion Date: 23.08.2016

Instrument Conditions: At Start At Stop

Temperature in °C: 30.0 30.0  
 Pressure in bar: 43.1 41.5  
 Flow in ml/min: 1.0 1.0

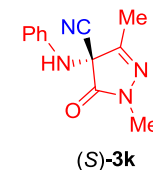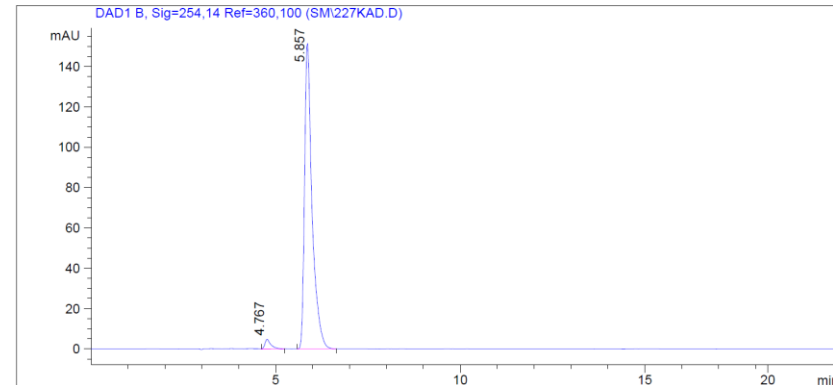

| #     | Ret. Time (min) | Width | Height (mAU) | Area (mAU*s) | Area % |
|-------|-----------------|-------|--------------|--------------|--------|
| 1     | 4.77            | 0.18  | 4.94         | 59.42        | 2.69   |
| 2     | 5.86            | 0.21  | 151.68       | 2150.16      | 97.31  |
| Total |                 |       |              |              | 100.00 |

Sample Name: SM226I  
 Data file: D:\ERNIE\SM\226IAD.D  
 Sample Info: Mobile phase: n-Heptane/iPrOH 7:3 ;  
 The sample is solved in DCM/LM

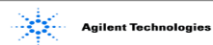

Column: DAICELAD.M  
 Column info: Chiralpak AD (250 x 4.6)mm 10μ

Operator: Analytical Lab AKEN

Injektion Time: 08:10:33  
 Injektion Date: 29.08.2016

Instrument Conditions: At Start At Stop

Temperature in °C: 30.0 30.0  
 Pressure in bar: 41.6 40.8  
 Flow in ml/min: 1.0 1.0

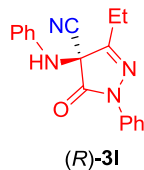

->

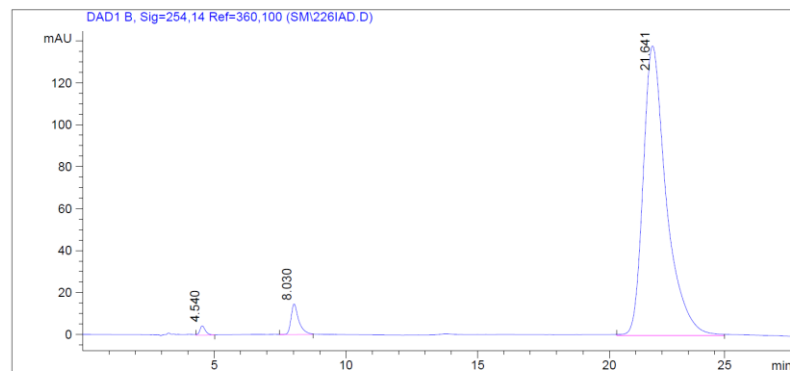

| #     | Ret. Time (min) | Width | Height (mAU) | Area (mAU*s) | Area % |
|-------|-----------------|-------|--------------|--------------|--------|
| 1     | 4.54            | 0.22  | 4.49         | 67.90        | 0.77   |
| 2     | 8.03            | 0.30  | 14.65        | 303.77       | 3.44   |
| 3     | 20.72           | 0.00  | 1.92         | 0.00         | 0.00   |
| 4     | 21.64           | 1.02  | 138.27       | 8460.10      | 95.79  |
| 5     | 22.00           | 0.00  | 90.66        | 0.00         | 0.00   |
| 6     | 22.56           | 0.00  | 28.71        | 0.00         | 0.00   |
| 7     | 22.96           | 0.00  | 11.74        | 0.00         | 0.00   |
| 8     | 23.52           | 0.00  | 2.51         | 0.00         | 0.00   |
| Total |                 |       |              | 8831.76      | 100.00 |

Sample Name: SM227I  
 Data file: D:\ERNIE\SM\227IAD.D  
 Sample Info: Mobile phase: n-Heptane/iPrOH 7:3 ;  
 The sample is solved in DCM/LM

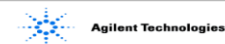

Column: DAICELAD.M  
 Column info: Chiralpak AD (250 x 4.6)mm 10μ

Operator: Analytical Lab AKEN

Injektion Time: 08:40:24  
 Injektion Date: 29.08.2016

Instrument Conditions: At Start At Stop

Temperature in °C: 30.0 30.0  
 Pressure in bar: 42.1 41.1  
 Flow in ml/min: 1.0 1.0

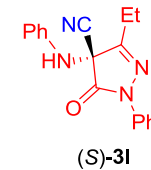

->

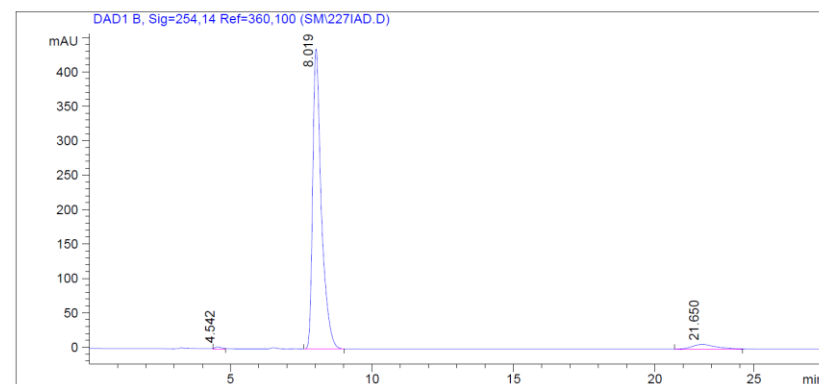

| #     | Ret. Time (min) | Width | Height (mAU) | Area (mAU*s) | Area % |
|-------|-----------------|-------|--------------|--------------|--------|
| 1     | 4.54            | 0.29  | 3.58         | 62.59        | 0.64   |
| 2     | 4.73            | 0.00  | 1.69         | 0.00         | 0.00   |
| 3     | 8.02            | 0.32  | 436.25       | 9272.51      | 94.81  |
| 4     | 21.61           | 0.00  | 7.01         | 0.00         | 0.00   |
| 5     | 21.65           | 1.04  | 7.12         | 445.50       | 4.55   |
| 6     | 22.90           | 0.00  | 0.96         | 0.00         | 0.00   |
| Total |                 |       |              | 9780.60      | 100.00 |

Sample Name: SM226m  
 Data file: D:\ERNIE\SM\226MAD.D  
 Sample Info: Mobile phase: n-Heptane/iPrOH 8:2 ;  
 The sample is solved in DCM/LM

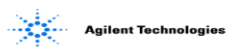

Column: DAICELAD.M  
 Column info: Chiralpak AD (250 x 4.6)mm 10μ

Operator: Analytical Lab AKEN

Injektion Time: 14:25:36  
 Injektion Date: 29.08.2016

| Instrument Conditions: | At Start | At Stop |
|------------------------|----------|---------|
| Temperature in °C:     | 30.0     | 30.0    |
| Pressure in bar:       | 36.4     | 35.3    |
| Flow in ml/min:        | 1.0      | 1.0     |

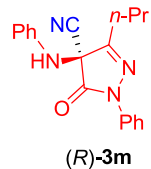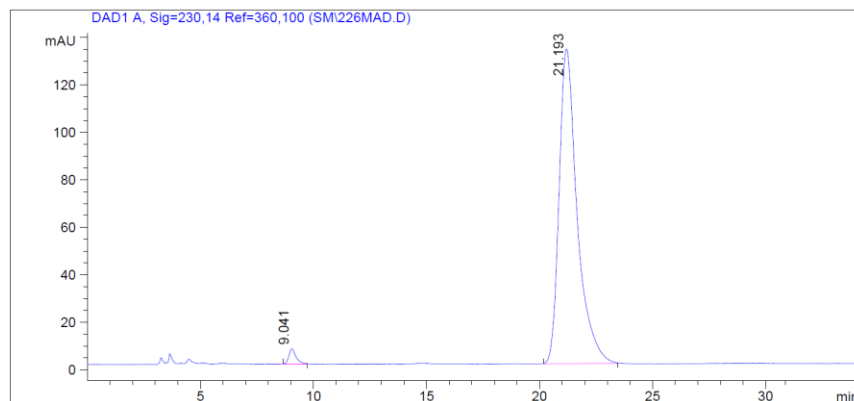

| #     | Ret. Time (min) | Width | Height (mAU) | Area (mAU*s) | Area %         |
|-------|-----------------|-------|--------------|--------------|----------------|
| 1     | 9.04            | 0.32  | 6.46         | 142.21       | 1.89           |
| 2     | 21.19           | 0.81  | 132.58       | 7366.34      | 98.11          |
| Total |                 |       |              |              | 7508.54 100.00 |

Sample Name: SM227m  
 Data file: D:\ERNIE\SM\227MAD.D  
 Sample Info: Mobile phase: n-Heptane/iPrOH 8:2 ;  
 The sample is solved in DCM/LM

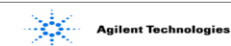

Column: DAICELAD.M  
 Column info: Chiralpak AD (250 x 4.6)mm 10μ

Operator: Analytical Lab AKEN

Injektion Time: 15:00:29  
 Injektion Date: 29.08.2016

| Instrument Conditions: | At Start | At Stop |
|------------------------|----------|---------|
| Temperature in °C:     | 30.0     | 30.0    |
| Pressure in bar:       | 36.4     | 35.7    |
| Flow in ml/min:        | 1.0      | 1.0     |

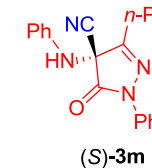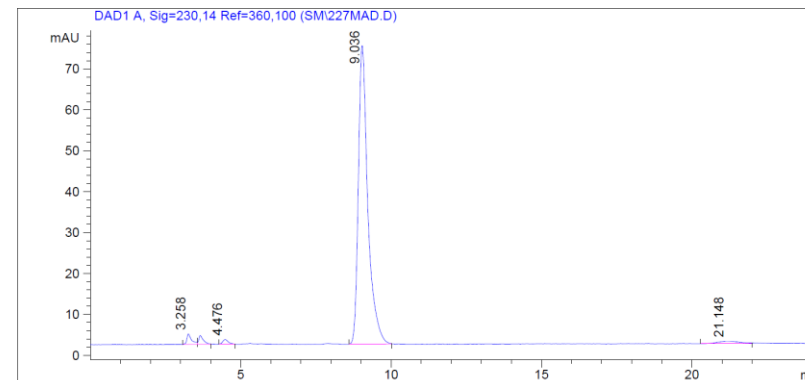

| #     | Ret. Time (min) | Width | Height (mAU) | Area (mAU*s) | Area %         |
|-------|-----------------|-------|--------------|--------------|----------------|
| 1     | 3.26            | 0.15  | 2.58         | 28.12        | 1.66           |
| 2     | 3.65            | 0.15  | 2.16         | 22.59        | 1.33           |
| 3     | 4.48            | 0.18  | 1.11         | 13.78        | 0.81           |
| 4     | 9.04            | 0.32  | 73.00        | 1598.09      | 94.19          |
| 5     | 21.15           | 0.86  | 0.66         | 34.12        | 2.01           |
| Total |                 |       |              |              | 1696.69 100.00 |

Sample Name: SM-226C  
 Data file: D:\ERNIE\SM\226CRAD.D  
 Sample Info: Mobile phase: n-Heptane/iPrOH 7:3

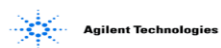

The sample is solved in DCM/LM

Column: DAICELAD.M  
 Column info: (250 x 4)mm; 5µ non-chiral column

Operator: Analytical Lab AKEN

Injektion Time: 12:39:19  
 Injektion Date: 15.08.2016

Instrument Conditions: At Start At Stop

Temperature in °C: 30.0 30.0  
 Pressure in bar: 42.8 41.6  
 Flow in ml/min: 1.0 1.0

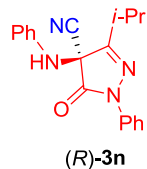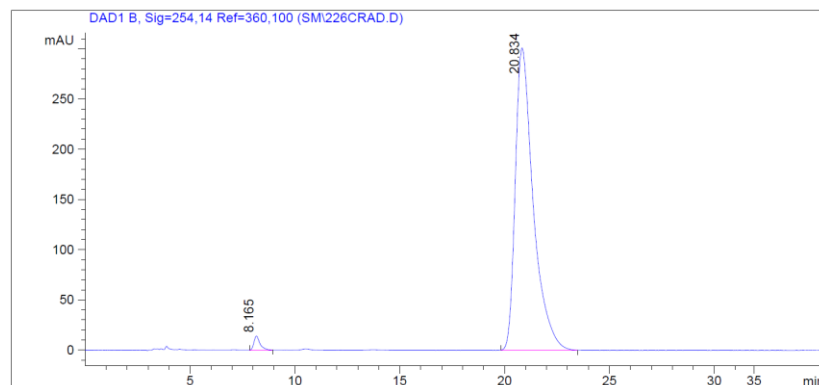

| #     | Ret. Time (min) | Width | Height (mAU) | Area (mAU*s) | Area % |
|-------|-----------------|-------|--------------|--------------|--------|
| 1     | 8.16            | 0.31  | 14.01        | 287.26       | 1.57   |
| 2     | 20.83           | 0.89  | 301.06       | 17962.86     | 98.43  |
| Total |                 |       |              | 18250.12     | 100.00 |

Sample Name: SM-227C  
 Data file: D:\ERNIE\SM\227CAD.D  
 Sample Info: Mobile phase: n-Heptane/iPrOH 7:3

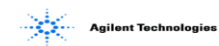

The sample is solved in DCM/LM

Column: DAICELAD.M  
 Column info: (250 x 4)mm; 5µ non-chiral column

Operator: Analytical Lab AKEN

Injektion Time: 13:15:28  
 Injektion Date: 15.08.2016

Instrument Conditions: At Start At Stop

Temperature in °C: 30.0 30.0  
 Pressure in bar: 42.2 41.6  
 Flow in ml/min: 1.0 1.0

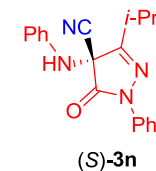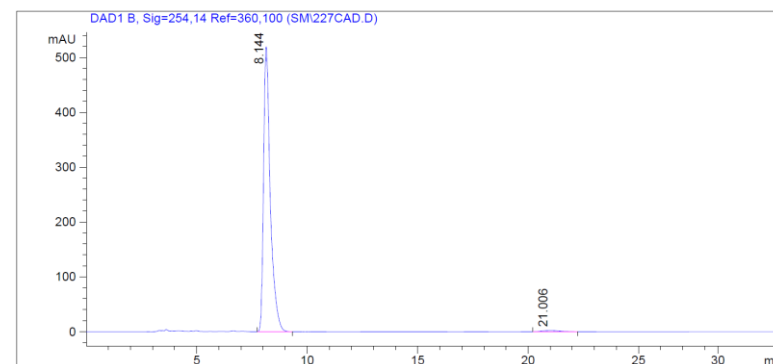

| #     | Ret. Time (min) | Width | Height (mAU) | Area (mAU*s) | Area % |
|-------|-----------------|-------|--------------|--------------|--------|
| 1     | 8.14            | 0.32  | 520.11       | 11039.21     | 98.92  |
| 2     | 21.01           | 0.71  | 2.25         | 120.06       | 1.08   |
| Total |                 |       |              | 11159.27     | 100.00 |

Sample Name: SM-226B  
 Data file: F:\2016#PNI.19D\SM\226BOD.D  
 Sample Info: Mobile phase: n-Heptane/EtOH 97:3;  
 The sample is solved in DCM/MP

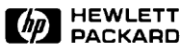

Säule: DAICELOD.M  
 Säuleninfo: Chiralpak AD (250x4,6)mm  
 Operator: Analytik Labor AKEN

Injektion Time: 13:11:45  
 Injektion Date: 25.11.2016

Instrument Conditions: At Start At Stop  
 Temperature in °C: 30.0 °C 30.0 °C  
 Pressure in bar: 19.1 18.9  
 Flow in ml/min: 0.50 0.50

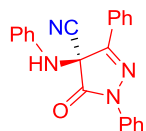

(R)-3p

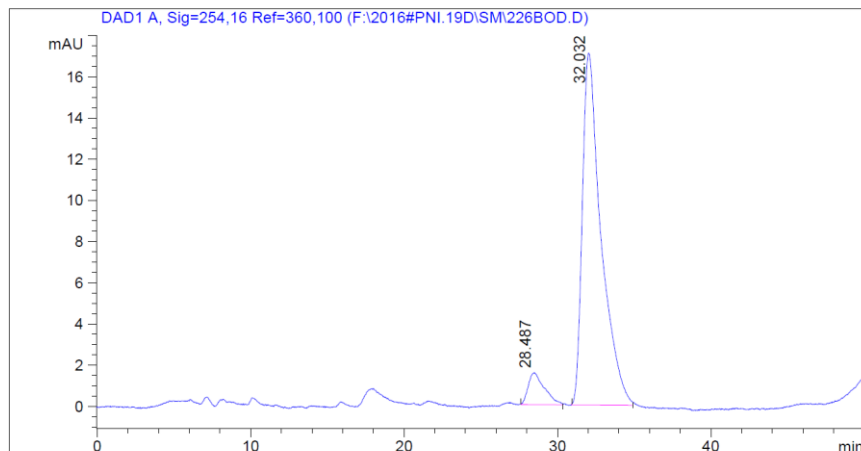

| #     | Ret. Time<br>(min) | Width | Height<br>(mAU) | Area<br>(mAU*s) | Area % |
|-------|--------------------|-------|-----------------|-----------------|--------|
| 1     | 28.49              | 0.87  | 1.56            | 114.20          | 7.30   |
| 2     | 32.03              | 1.16  | 17.09           | 1450.54         | 92.70  |
| Total |                    |       |                 | 1564.74         | 100.00 |

Sample Name: SM-227B  
 Data file: F:\2016#PNI.19D\SM\227BOD.D  
 Sample Info: Mobile phase: n-Heptane/EtOH 97:3;  
 The sample is solved in DCM/MP

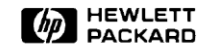

Säule: DAICELOD.M  
 Säuleninfo: Chiralpak AD (250x4,6)mm  
 Operator: Analytik Labor AKEN

Injektion Time: 14:02:58  
 Injektion Date: 25.11.2016

Instrument Conditions: At Start At Stop  
 Temperature in °C: 30.0 °C 30.0 °C  
 Pressure in bar: 19.2 19.3  
 Flow in ml/min: 0.50 0.50

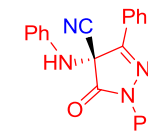

(S)-3p

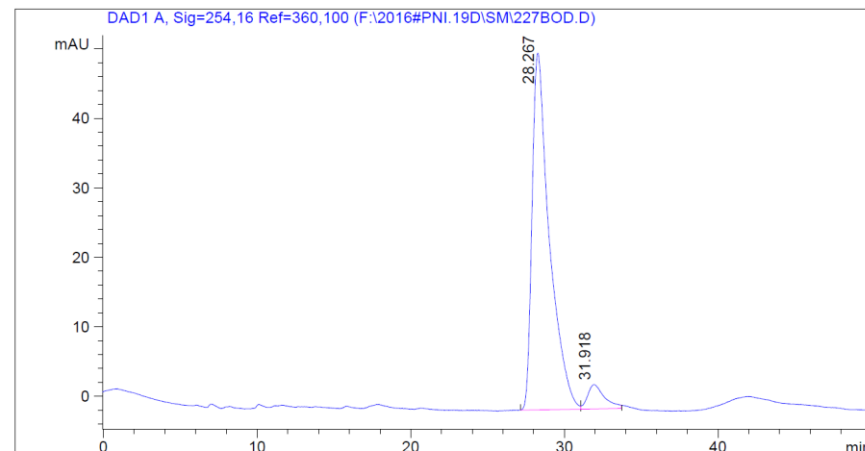

| #     | Ret. Time<br>(min) | Width | Height<br>(mAU) | Area<br>(mAU*s) | Area % |
|-------|--------------------|-------|-----------------|-----------------|--------|
| 1     | 28.27              | 1.12  | 51.32           | 4021.58         | 93.71  |
| 2     | 31.92              | 1.28  | 3.51            | 269.72          | 6.29   |
| Total |                    |       |                 | 4291.30         | 100.00 |

Sample Name: PC1110RAC  
 Data file: D:\GONZO\PC\PC1110RA.D  
 Sample Info: Chiralpak AD, 8:2 (Heptan:IPROH), 1 ml min<sup>-1</sup>  
 The sample is solved in DCM/MP

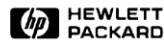

Säule: DAICELAD.M  
 Säuleninfo: Chiralpak AD (250x4,6)mm  
 Operator: Analytik Labor AKEN

Injektion Time: 15:49:55  
 Injektion Date: 09.03.2017

Instrument Conditions: At Start At Sto  
 Temperature in °C: 30.0°C 30.0  
 Pressure in bar: 35.6 35.8  
 Flow in ml/min: 1.00 1.00

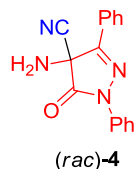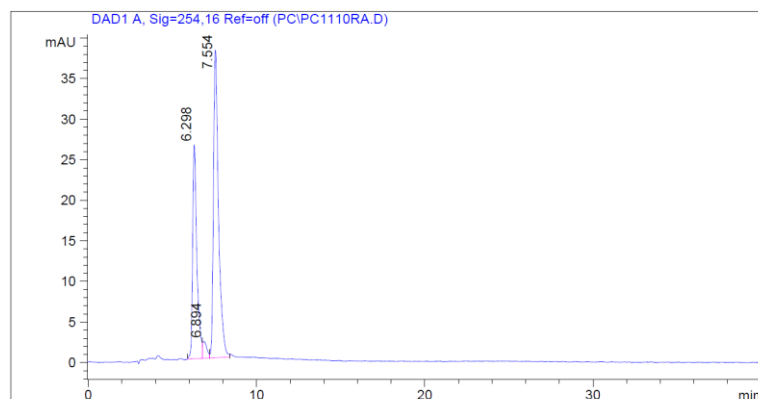

| #     | Ret. Time (min) | Width | Height (mAU) | Area (mAU*s) | Area % |
|-------|-----------------|-------|--------------|--------------|--------|
| 1     | 6.30            | 0.26  | 26.35        | 465.24       | 36.03  |
| 2     | 6.89            | 0.22  | 2.07         | 36.19        | 2.80   |
| 3     | 7.55            | 0.31  | 37.92        | 789.87       | 61.17  |
| Total |                 |       |              | 1291.31      | 100.00 |

Sample Name: PC1112  
 Data file: D:\GONZO\PC\PC1112.D  
 Sample Info: n-Heptane/iPrOH 8:2; Flow= 1.0 ml min<sup>-1</sup>, Chiralpak AD  
 The sample is solved in DCM/MP

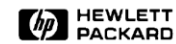

Säule: DAICELAD.M  
 Säuleninfo: Chiralpak AD (250x4,6)mm  
 Operator: Analytik Labor AKEN

Injektion Time: 10:17:46  
 Injektion Date: 03.04.2017

Instrument Conditions: At Start At Sto  
 Temperature in °C: 30.0°C 30.0  
 Pressure in bar: 33.3 33.3  
 Flow in ml/min: 1.00 1.00

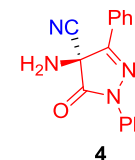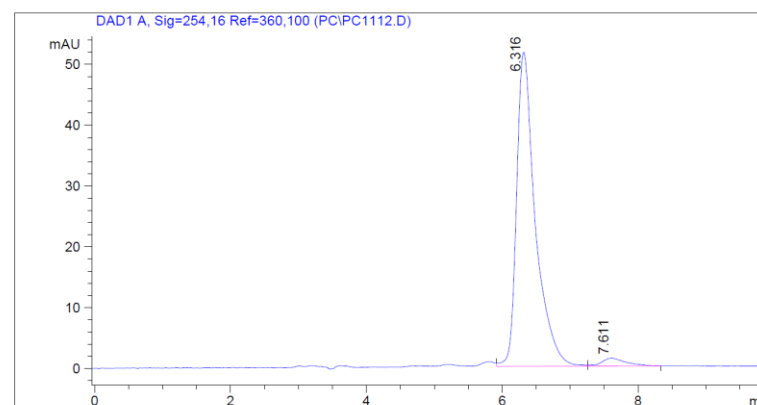

| #     | Ret. Time (min) | Width | Height (mAU) | Area (mAU*s) | Area % |
|-------|-----------------|-------|--------------|--------------|--------|
| 1     | 6.32            | 0.28  | 51.67        | 990.34       | 96.80  |
| 2     | 7.61            | 0.32  | 1.32         | 32.78        | 3.20   |
| Total |                 |       |              | 1023.13      | 100.00 |
